1 **A *Mesp1*-dependent developmental breakpoint in transcriptional and epigenomic**  
2 **specification of early cardiac precursors**

3  
4

5 Alexis Leigh Krup<sup>1,2</sup>, Sarah A.B. Winchester<sup>2</sup>, Sanjeev S. Ranade<sup>2</sup>, Ayushi Agrawal<sup>2</sup>, W. Patrick  
6 Devine<sup>3</sup>, Tanvi Sinha<sup>4</sup>, Krishna Choudhary<sup>2</sup>, Martin H. Dominguez<sup>2,4,5,6</sup>, Reuben Thomas<sup>2</sup>, Brian  
7 L. Black<sup>4,7</sup>, Deepak Srivastava<sup>2,7,8,9</sup>, and Benoit G. Bruneau<sup>2,8,9,10,11</sup>

8

- 9 1. Biomedical Sciences Program, University of California, San Francisco, CA 94158 USA  
10 2. Gladstone Institutes, San Francisco, CA 94158, USA  
11 3. Department of Pathology, University of California, San Francisco, CA 94158, USA  
12 4. Cardiovascular Research Institute, University of California, San Francisco, CA 94158,  
13 USA  
14 5. Department of Medicine, Division of Cardiology, University of California, San Francisco,  
15 CA 94158, USA  
16 6. Cardiovascular Institute, University of Pennsylvania, Philadelphia, PA, USA  
17 7. Department of Biochemistry and Biophysics, University of California, San Francisco, CA  
18 94158, USA  
19 8. Department of Pediatrics, University of California, San Francisco, CA 94158, USA  
20 9. Roddenberry Center for Stem Cell Biology and Medicine at Gladstone, San Francisco,  
21 CA, USA  
22 10. Institute for Human Genetics, University of California, San Francisco, CA 94158, USA  
23 11. Eli and Edythe Broad Center of Regeneration Medicine and Stem Cell Research,  
24 University of California, San Francisco, CA 94158, USA

25  
26

27  
28

29

30 **Abstract**

31 Transcriptional networks governing cardiac precursor cell (CPC) specification are incompletely  
32 understood due in part to limitations in distinguishing CPCs from non-cardiac mesoderm in early  
33 gastrulation. We leveraged detection of early cardiac lineage transgenes within a granular single  
34 cell transcriptomic time course of mouse embryos to identify emerging CPCs and describe their  
35 transcriptional profiles. *Mesp1*, a transiently-expressed mesodermal transcription factor (TF), is  
36 canonically described as an early regulator of cardiac specification. However, we observed  
37 perdurance of CPC transgene-expressing cells in *Mesp1* mutants, albeit mis-localized,  
38 prompting us to investigate the scope of *Mesp1*'s role in CPC emergence and differentiation.  
39 *Mesp1* mutant CPCs failed to robustly activate markers of cardiomyocyte maturity and critical  
40 cardiac TFs, yet they exhibited transcriptional profiles resembling cardiac mesoderm  
41 progressing towards cardiomyocyte fates. Single cell chromatin accessibility analysis defined a  
42 *Mesp1*-dependent developmental breakpoint in cardiac lineage progression at a shift from  
43 mesendoderm transcriptional networks to those necessary for cardiac patterning and  
44 morphogenesis. These results reveal *Mesp1*-independent aspects of early CPC specification  
45 and underscore a *Mesp1*-dependent regulatory landscape required for progression through  
46 cardiogenesis.

## 47 INTRODUCTION

48           Cardiogenesis requires precise specification and patterning of the cardiac precursor  
49 cells (CPCs) as they emerge from the gastrulating mesoderm in very early stages of  
50 embryogenesis. Errors in this process lead to congenital heart defects (CHDs), which affect 1-  
51 2% of live births (Bruneau, 2008). The genetic etiology of CHDs indicates that genes encoding  
52 transcriptional regulators are overrepresented as causative and are predominantly  
53 haploinsufficient, indicating that fine dysregulation of gene expression is a critical mechanism for  
54 disease (Zug, 2022; Nees & Chung, 2019). A thorough delineation of the transcriptional  
55 networks governing cardiogenesis is foundational to understanding how defects in this process  
56 manifest as CHDs, and may inform the design of strategies to treat CHDs and heart disease  
57 broadly.

58           Cardiogenesis begins when mesoderm progenitors emerge from the primitive streak and  
59 migrate towards the anterior-lateral aspects of the developing embryo (Saga, Kitajima &  
60 Miyagawa-Tomita, 2000; Saga et al., 1999). Interrogating the earliest cardiac progenitors  
61 distinctly from the developing mesoderm has historically been challenging due to a paucity of  
62 molecular markers available to distinguish a CPC from the rest of the developing mesoderm.  
63 Prior studies used lineage tracing of mesoderm progenitors expressing the basic-helix-loop-  
64 helix (bHLH) transcription factor (TF) *Mesp1*, which is transiently expressed in cells that go on to  
65 contribute to the heart, somitic mesoderm derivatives, and craniofacial mesoderm (Devine et al.,  
66 2014; Lescroart et al., 2014; Saga et al., 1999). Clonal lineage tracing studies have shown that  
67 a subset of *Mesp1*<sup>+</sup> cells at early gastrulation are fated for distinct cardiac substructures well  
68 before anatomy is patterned, highlighting extensive diversification among early mesodermal  
69 progenitors (Devine et al., 2014; Lescroart et al., 2014; Liu, 2017).

70           Deletion of *Mesp1* in mice variably disrupts specification and migration of cardiac  
71 progenitors (Ajima et al., 2021; Saga, Kitajima & Miyagawa-Tomita, 2000; Saga et al., 1999;  
72 Kitajima et al., 2000; Lescroart et al., 2018). During *in vitro* cardiac differentiation,  
73 overexpression of *Mesp1* induces expression of subsequent cardiac TFs, indicating a potentially  
74 instructive role in cardiogenesis (Chiapparo et al., 2016; Bondue et al., 2008; Lindsley et al.,  
75 2008; Wu, 2008; Kelly, 2016; Bondue & Blanpain, 2010; Lin et al., 2022; Soibam et al., 2015).  
76 Gain of function experiments suggest a broad and important function for *Mesp1* in mesoderm  
77 differentiation, but the *in vivo* gene regulatory landscape controlled by *Mesp1* remains unclear  
78 (Costello et al., 2011; Saga et al., 1999; Liu, 2017; Saga, Kitajima & Miyagawa-Tomita, 2000;  
79 Ajima et al., 2021; Saga et al., 1996; Kitajima et al., 2000; Lin et al., 2022).

80 Previous studies identified an enhancer of *Smarcd3*, “F6”, which is specifically active in  
81 CPCs fated to become the totality of heart cells, and is active shortly after *Mesp1* expression  
82 and before other early cardiac-specific TFs are expressed (Devine et al., 2014; Yuan et al.,  
83 2018). Thus, *Smarcd3*-F6 activity enables distinct identification of CPCs as they emerge from  
84 the developing mesoderm. We found that the *Smarcd3*-F6 enhancer remains active in posterior  
85 regions of *Mesp1* KOs, indicating perdurance of cardiogenesis in some capacity. Here, we  
86 utilized the *Smarcd3*-F6 transgene to comprehensively delineate the dynamic transcriptional  
87 and epigenomic consequences of *Mesp1* loss during early cardiogenesis and reveal *Mesp1*-  
88 independent aspects of cardiac specification. This study challenges the concept of a master  
89 regulator for cardiac specification by defining transcriptional phases with different vulnerabilities  
90 to *Mesp1* loss.

91

## 92 RESULTS

### 93 Computational detection of fluorescent transgene reporters enables identification of 94 emerging cardiogenic mesoderm from whole embryo single cell transcriptomic data

95 To identify the emerging cardiogenic mesoderm cells at their earliest stages we  
96 employed a reporter transgene strategy in combination with scRNA-seq on a whole embryo time  
97 course spanning early gastrulation (E6.0) until cardiac crescent stages (E7.75) (Fig. 1A-B, Fig.  
98 S1). Embryos contained a fluorescent transgene reporter for the *Mesp1* lineage via  
99 *Mesp1<sup>Cre</sup>;Rosa26<sup>Ai14</sup>* (Saga et al., 1999; Madisen et al., 2010), and the *Smarcd3*-F6::eGFP  
100 enhancer transgene that constitutively marks CPCs (Devine et al., 2014; Yuan et al., 2018) (Fig.  
101 1C, Fig. S1). We processed whole embryos for scRNA-seq and used computational detection of  
102 the fluorescent transgene reporters to identify the emerging cardiogenic mesoderm (Fig. 1C).  
103 Following an annotation of cell types in the whole embryo atlas (Fig. S2A, Table S1, Table  
104 S2A), we subsetted cell clusters expressing the Ai14 and eGFP fluorescent transgenes and  
105 demonstrated that these cells resemble the emerging cardiac mesoderm (Fig. 1D-F, Fig. S2B,  
106 Table S1, Table S2B). *Smarcd3*-F6+ cell clusters (Fig. 1F, Fig. 2B, Table S1, Table S2B) co-  
107 expressed early cardiac and mesoderm genes in the mesoderm exiting the primitive streak  
108 (meso exiting PS), anterior mesendoderm (antME), and cells of the lateral plate mesoderm  
109 (LPM) such as *T*, *Eomes*, *Mesp1*, *Mixl1*, and *Smarcd3* (Fig. 1D, Fig. S3A). *Smarcd3*-F6+  
110 cardiomyocytes (CMs) co-expressed cardiac structural genes such as *Myl7*, *Tnnt2*, *Actc1* (Fig.  
111 1D-F, Fig. S3B) and cardiac TFs such as *Tbx5*, *Hand1*, *Nkx2-5*, *Gata5* (Fig. 1D-F, Fig. S3C).  
112 Thus, *Smarcd3*-F6 enhancer transgene expressing cells have transcriptional signatures of early



113 emerging CPCs, extending the initial description of this transgene (Devine et al., 2014) by  
114 validating high-fidelity demarcation of emerging early CPCs within the mesoderm prior to  
115 expression of cardiac-specific TFs in scRNA-seq data (Fig. S2B, Fig. S3).

116 In summary, we generated a resource dataset and interrogated dynamic gene  
117 expression programs in the cardiogenic mesoderm using reporter transgenes, which will  
118 facilitate description of emerging heterogeneity within the cardiac lineage during gastrulation.

119

## 120 **Transcriptional profiling of *Smarcd3*-F6+ cells shows enduring expression of cardiac** 121 **genes in *Mesp1* knockout embryos**

122 To determine the requirement for *Mesp1* in establishing CPC identity, we investigated  
123 the transcriptional identities of *Smarcd3*-F6+ cells upon loss of *Mesp1*. We detected *Smarcd3*-  
124 F6 expressing cells in *Mesp1*<sup>Cre/Cre</sup> (*Mesp1* KO) embryos, although positive cells are localized  
125 posteriorly relative to control embryos at early cardiac crescent stages (Fig. 2A). The  
126 persistence of *Smarcd3*-F6+ cells led us to hypothesize that these cells represent retained  
127 CPCs, suggesting that as previously described (Saga, Kitajima & Miyagawa-Tomita, 2000;  
128 Ajima et al., 2021; Saga et al., 1999), aspects of early cardiac specification may be *Mesp1*-  
129 independent. Thus, the transcriptional and epigenomic programs regulated by and independent  
130 of *Mesp1* remain to be understood during *in vivo* cardiogenesis.

131 We performed scRNA-seq on whole *Mesp1* KO embryos and littermate controls along a  
132 timeline of developmental stages for early cardiogenesis spanning early gastrulation (E6.0) to  
133 cardiac crescent formation (E7.75) (Fig. S6A). We bioinformatically identified *Smarcd3*-F6-  
134 eGFP-expressing cells from the whole embryo time course (Fig. S6A-D, Table S4A) to generate  
135 an atlas of 4,868 *Smarcd3*-F6+ cells representing 24 cell types (Fig. 2B, Fig. S4A, Table S1,  
136 Table S3A). The majority of *Smarcd3*-F6+ cells represented early cardiac mesodermal  
137 derivatives such as the late streak mesoderm (LSMeso), *Mesp1*+ mesoderm (*Mesp1*M),  
138 posterior mesoderm (postMeso), LPM, precardiac mesoderm (preCardiacMeso), and early CMs  
139 (Fig. 2B-C, Fig. S4A). We detected cells of the allantois, lateral plate mesoderm/extraembryonic  
140 mesoderm (LPM-ExEM), and the node/notochord, consistent with *Smarcd3* expression in these  
141 domains (Fig 2B, Fig. S4B) (Takeuchi et al., 2007; Devine et al., 2014). Additionally, we found  
142 populations of blood, endothelial cells, Reichert's membrane, posterior paraxial mesoderm  
143 (postPrxM) and cells appearing endoderm-like, potentially representing early mesendoderm  
144 cells (Fig. 2B, Fig. S4A). Inducible lineage labeling of *Smarcd3*-F6+ cells at E6.5 excluded

145 lineage contributions to non-cardiac cell types (Devine et al., 2014), suggesting detection here is  
146 the result of genotype-agnostic, weak, or transient transgene expression (Fig. S4A).

147 To examine overall trends in gene expression differences between *Mesp1* KO and  
148 control, we performed a comparison of all *Smarcd3*-F6+ cells between genotypes irrespective of  
149 cell type or embryonic stage in the developmental timeline (Fig. S4B, Table S3B). We found that  
150 *Mesp1* KO *Smarcd3*-F6+ cells express mesodermal genes of the emerging cardiac lineage  
151 such as *Tdgf1*, *Lhx1*, *Eomes*, and *Myl7*, however mostly lacked expression of more mature  
152 cardiac progenitor markers such as *Nkx2-5* (Fig. 2E, Fig. S4A). When we divided the “all cells”  
153 genotype analysis into relative developmental stages separating “Early” embryos (E6.0-E6.5),  
154 “Middle” embryos (late E6.5-E7.5), and “Late” embryos (late E7.5 to early E7.75), we found that  
155 genotype discrepancies in cardiac-related gene expression were minor at Early stages and  
156 diverged with increasing embryonic age (Fig. 2E).

157 Relatedly, the distribution of genotypes across *Smarcd3*-F6+ cell types shows that  
158 *Mesp1* KO cells are not fully represented in every cell type (Fig. 2B-D, Fig. S4C). Both  
159 genotypes were present in mesoderm clusters (C1, C3), the preCardiacMeso (C4), the  
160 postMeso (C5), retinoic acid signaling cells (C6), LSMeso (C7), allantois (C8), endothelial (C9),  
161 postPrxM (C10), the endoderm-like clusters (C11, C14, C19), the LPM-ExEM cluster (C15), the  
162 primitive streak (PS) (C17), postMeso (C20), blood (C21), and Reichert’s (C23) (Fig. 2B-C, Fig.  
163 S4C). Only control cells were present in LPMs (C0, C16), CMs (C2, C12), postLPM (C13),  
164 *Mesp1*M (C18), node/notochord (C22). Many of the cell types comprised only of control were  
165 Late-stage embryo cells (Fig. 2B-D, Fig. S4C), indicating that cell type heterogeneity was  
166 affected with loss of *Mesp1* in *Smarcd3*-F6+ cells with increasing severity as development  
167 progresses. Furthermore, while the preCardiacMeso and LSMeso cell types were represented  
168 by both genotypes in Early- and Middle-staged embryos, the Late-stage embryo cells  
169 represented in the preCardiacMeso were exclusively *Mesp1* KO (Fig. 2B-D, Fig. S4C),  
170 indicating retention of precursor transcriptional profiles.

171 To understand *Mesp1*-correlated differences in emerging *Smarcd3*-F6+ CPCs in  
172 individual cell types, we performed differential expression testing within cell types present in  
173 both genotypes (Table S3C-F). Within preCardiacMeso and LSMeso cells, we found similar  
174 expression of *Tdgf1*, *Eomes*, *Fgf8*, genes involved in early mesoderm specification (Fig. S5A-C)  
175 (Probst et al., 2020; Reifers et al., 2000). These results were confirmed by multiplexed RNA *in*  
176 *situ* hybridization, which showed co-expression of *Smarcd3*-F6 with these markers in  
177 cardiogenic regions of E6.0-E6.5 (Fig. 2F, Fig. 2I) and E7.0 (Fig. 2H) embryos. Notably, *Mesp1*

178 KO embryos at early stages showed decreased or delayed expression of *Smarcd3*-F6 (Fig 2H-  
179 K), and broad posterior expansion of *Tdgf1* (Fig. 2F) and *Fgf8* (Fig. 2H) expression beyond  
180 *Smarcd3*-F6+ cardiogenic regions. Additionally, *Tdgf1* and *Eomes* expression aberrantly  
181 perdured through late E7.5 (Fig. 2F,G) and E7.0 (Fig. 2I-J), respectively. Other genes involved  
182 in early mesoderm specification (*Fgf10*), lineage specification and pluripotency exit (*Chchd2* and  
183 *Nme2*), and non-cardiac mesoderm genes (*Amot*) were upregulated in *Mesp1* KO cells relative  
184 to controls, while genes involved in migration and patterning (*Lefty2*, *Rac1*, *Foxf1*) were  
185 downregulated (Fig. S5B,C) (Zhu et al., 2009, 2016; Migeotte, Grego-Bessa & Anderson, 2011;  
186 Sang et al., 2021).

187 Within the Late-stage-dominated LPM-ExEM and endoderm-like1 cell types, we found  
188 similar expression levels of *Myl7* between genotypes (Fig. 2K, Fig. S5A, Fig. S5D,E). *Mesp1* KO  
189 cells displayed relative upregulation of early mesoderm specification genes (*Tdgf1*, *Eomes*,  
190 *Fgf8*, *S100a10*, *Ifitm2*, *Fn1*) and downregulation of morphogenesis and migration genes (*Dlk1*,  
191 *Elavl1*) (Fig. S5D,E) (Probst et al., 2020; Cheng et al., 2013; Klymiuk et al., 2012; Saykali et al.,  
192 2019; Katsanou et al., 2009)

193 Collectively, these analyses indicate that the *Mesp1* KO transcriptional phenotype of  
194 *Smarcd3*-F6+ cells becomes increasingly disrupted as embryonic development progresses,  
195 consistent with the divergent morphology of *Mesp1* KO embryos at cardiac crescent stages (Fig.  
196 2A-D).

197

### 198 **Alterations to cardiac mesoderm in *Mesp1* KO embryos become increasingly severe as** 199 **gastrulation progresses**

200 Following characterization of *Mesp1* KO effects in *Smarcd3*-F6+ cells specifically, we  
201 sought to understand alterations to the mesoderm, inclusive of *Smarcd3*-F6+ cells and the  
202 cardiac mesoderm, more broadly. We applied our method of dual-reporter transgene  
203 identification (Fig. 1) to generate an atlas of 35,792 mesodermal cells from both control and  
204 *Mesp1* KO embryos (Fig. S6A-F, Table S1, Table S4). The relative Early- and Middle-stage  
205 embryos showed a similar census of mesodermal cell types between genotypes, including  
206 preCardiacMeso (Fig. S6E-I). However, *Mesp1* KO Late-stage embryo mesoderm lacked many  
207 of the cell types present in control, such as mature CMs, PrxM, and PrSoM cells (Fig. S6E-I). To  
208 interrogate how these changes occur in developmental time, we divided the mesoderm dataset  
209 into the Early, Middle, and Late developmental stages as defined in Fig. 2E. Mesodermal cells

210 for each stage were re-clustered, and differential gene expression was assessed between  
211 genotypes (Fig. 3, Table S4).

212 Within the Early mesoderm dataset (Fig. 3A, Fig. S7A, Table S4C), we identified the  
213 LSMeso2 and *Eomes*+ primitive streak mesoderm (*Eomes*PSMeso) as clusters of interest for  
214 cardiac specification based on enriched *Smarcd3*-F6+ expression (Fig. 3C). Both genotypes  
215 were present in each cell type (Fig. 3B), indicating that *Mesp1* KO cells are able to engage with  
216 transcriptional programs to exit pluripotency and initiate cardiac mesoderm specification.  
217 Differential gene expression analysis revealed *Mesp1* KO cells showed upregulation of  
218 mesendoderm and PS markers (*Fgf5*, *Mixl1*, *Upp1*, *Fgf5*, *Sox2*, *Tdgf1*), downregulation of LPM  
219 differentiation genes (*Foxf1*, *Taf10*), downregulation of migration and patterning genes (*Rac1*,  
220 *Elavl1*), and persistent but decreased expression of cardiac *Myl7* (Fig. 3D-E, Table S4D,E).

221 Within the Middle mesoderm dataset (Fig. 3F-H, Fig. S7B, Table S4F) we focused on  
222 the *Smarcd3*-F6 enriched *Mesp1*+ mesendoderm cluster (*Mesp1*ME) and its developmental  
223 predecessors, LSMeso2 cells. Middle-stage LSMeso2 cells (Fig. 3I, Table S4G) showed similar  
224 expression patterns between genotypes to Early-stage LSMeso cells (Fig. 3D). *Mesp1* KO cells  
225 of the *Mesp1*ME upregulated posterior mesoderm organization genes (*Fgf10* and *Gsc*) (Probst  
226 et al., 2020; Meijer et al., 2000; Branney et al., 2009) and the non-cardiac mesoderm gene  
227 *Anxa2* (Schwartz et al., 2014; Wang et al., 2015), and downregulated *Lefty2*, *Rac1*, and  
228 myogenesis differentiation gene *Pcbp1* (Shi & Grifone, 2021) (Fig. 3J, Table S4H). Notably,  
229 there was an absence of *Mesp1* KO cells in *Smarcd3*-F6 and *Mesp1* enriched clusters  
230 representing *Foxc2*+ mesoderm cells (Fig. 3F-H, Fig. S8A). *Foxc2* operates in cardiac field  
231 diversification and morphogenesis (Seo & Kume, 2006; Lescroart et al., 2018). Examination in  
232 E6.75 embryos by immunohistochemistry and light sheet imaging showed that anterior-proximal  
233 marker domains were misaligned in *Mesp1* KO embryos, and *Foxc2* was absent (Fig. S8A-B).  
234 Together, these results indicate dysregulation of networks controlling cellular movements and  
235 domain boundaries, as well as reduced cellular diversification in *Mesp1* KO embryos of pre-  
236 crescent stages.

237 Analysis of Late mesoderm *Mesp1* KO cells revealed restricted diversity of both cardiac  
238 and other mesodermal cell types (Fig. 3K-L, Fig. S7C, Table S4I). Furthermore, while both  
239 genotypes were found in *Smarcd3*-F6 enriched clusters (*Meso1*, *Meso\_2*) and the postLPM,  
240 there were no *Mesp1* KO cells in the CM clusters (Fig. 3K,M). *Mesp1* KO cells from *Meso1* and  
241 *Meso2* clusters had highly disrupted transcriptional profiles characterized by upregulation of  
242 several mesodermal genes (*Cited2*, *Ifitm2*, *Mif*, *Ahnak*, *Ankrd11*, *Myl6*) (Weninger et al., 2005;

243 Lange et al., 2003; Huang et al., 2022) and downregulation of cardiac maturation genes (*Dlk1*,  
244 *Acta2*, *Ifitm1*) (Pursani et al., 2017; Klymiuk et al., 2012) (Fig. 3N,O, Table S4J,K). Additionally,  
245 the few *Mesp1* KO cells present in the postLPM cluster upregulated genes involved in  
246 mesendoderm specification and organization (*Lhx1*, *Eomes*, *Asb4*) (Fernandez-Guerrero et al.,  
247 2021) and downregulated or else lacked patterning, morphogenesis, and maturation genes  
248 (*Crabp1*, *Foxc2*, *Meis2*) (Fig. 3P, Table S4L). From these results we conclude that Late stage  
249 *Mesp1* KO embryos fail to produce mature CMs and various mesoderm cell types, and display  
250 highly disrupted transcriptional profiles in the cardiac mesoderm cells that are present.

251 Thus, similar to the patterns described specifically in *Mesp1* KO *Smarcd3*-F6+ CPCs,  
252 *Mesp1* KO cardiac mesoderm cells show transcriptional dysregulation that becomes  
253 increasingly divergent as embryonic development progresses. Additionally, we observed gross  
254 disruption of mesoderm diversification beyond purely cardiogenic cell types in Middle- and Late-  
255 stage *Mesp1* KO embryos (Fig. 3F-H,K-M, Fig. S8), consistent with their altered morphology.

256

### 257 ***Mesp1* knockout cardiac mesoderm cells progress incompletely and imperfectly towards** 258 **cardiomyocyte fates**

259 We next investigated the steps of cardiac fate progression to understand how *Mesp1* KO  
260 embryos initiate cardiogenesis but fail to produce mature CMs. Utilizing pseudotemporal  
261 trajectory ordering with URD (Farrell et al., 2018) on the full mesoderm dataset, we defined the  
262 epiblast cells, the cluster also containing the earliest staged embryos (C1-Epiblast in Fig.  
263 S6E,G), as the root, and clusters containing the most differentiated mesodermal cells from the  
264 oldest stage embryos as the tips (Fig. 4A, Fig. S6E,G, Fig. S9A,B). We layered expression of  
265 *Smarcd3*-F6-eGFP to identify the main cardiogenic fate paths within the tree space, which also  
266 co-expressed CM genes such as *Nkx2-5*, *Myl7*, and *Smarcd3* (Fig. 4C, Fig. S9C). Within CM  
267 and CardiacMeso fate branches, *Mesp1* KO cells occupied the youngest pseudotemporal  
268 positions near the top of the branch segment, and were more represented in younger  
269 pseudotime segment branches of the tree, including their own earlier-pseudotime branch fate  
270 “C22” which was defined by multiple mesodermal genes not representative of any particular  
271 wildtype cell type (Fig. 4A-B, Fig. S6E,I).

272 Focusing on the cardiogenic fate tree section beginning at segment 34, we performed  
273 differential gene expression analysis to compare cell types of similar fate potentials within  
274 branch segments or pseudotemporal levels of the trajectory (Fig. 4D-H). Among CM-fated cells,  
275 *Mesp1* KO cells were enriched for expression of *Anxa2*, *Hand1*, *Krt8* and other genes



276 reminiscent of extraembryonic mesoderm, expressed lower levels of structural myocyte genes  
277 such as *Myf7* and *Tnnt2* relative to control, and lacked *Nkx2-5* transcripts. (Fig. 4D, Table S5A).  
278 *Hand1* was similarly enriched in *Mesp1* KO CardiacMeso-fated cells, along with *Vim*, a  
279 fibroblast gene, and *Tagln2*, a gene involved in cell transformation and cell morphology (Han et  
280 al., 2017) (Fig. 4E, Table S5B). In the CardiacMeso-fated segment, *Myf7* and *Id2* were reduced  
281 relative to controls, as was *Ankrd1*, a gene implicated in sarcomere-binding and dilated  
282 cardiomyopathy that is known to be upregulated with overexpression of *Mesp1* (Bondue &  
283 Blanpain, 2010; Moulik et al., 2009) (Fig. 4E, Table S5B). In the branch that gave rise to CM  
284 and CardiacMeso fates, segment 30, *Amot*, *Hand1*, and *Ifitm2*, genes expressed in the posterior  
285 proximal extraembryonic border of the murine embryo and ExEMeso, were increased in *Mesp1*  
286 KO cells (Fig. 4F, Table S5C). By contrast, myocyte and cardiac progenitor genes *Myf7*, *Gata5*,  
287 and *Gata4* were decreased in *Mesp1* KO cells relative to control (Fig. 4F, Table S5C). In *Mesp1*  
288 KO cells in segment 34, the predecessors to LPM mesodermal derivatives, pronephros gene  
289 *Cox6b1*, spongiotrophoblast and extraembryonic energy storage gene *Phlda2*, and ESC self-  
290 renewal gene *Nme2* (Zhu et al., 2009) were enriched, while retinoic acid gene *Crabp2* and early  
291 gastrulation genes *Dnmt3b*, *Pou5f1* were downregulated (Fig. 4G, Table S5D). Finally, we  
292 compared the *Mesp1* KO cell-dominated segment 22 to its pseudotime-branching contemporary  
293 segment 30, and found enriched expression of mesoderm-fate promoting gastrulation TFs *Cdx2*  
294 and *T*, along with mesendoderm allocation gene *Tdgf1* (Fig. 4H, Table S5E). Conversely,  
295 cardiac progenitor morphogenesis TFs *Mef2c*, *Gata6*, and *Gata4* were downregulated (Fig. 4H,  
296 Table S5E).

297 We summarize these analyses of *Mesp1* KO cardiac mesoderm fates into two  
298 categories; 1) retained expression of some cardiac progenitor genes (*Myf7*, *Gata4/5/6*, *Id2*,  
299 *Tnnt2*), albeit at decreased levels relative to control, and absence of others (*Nkx2-5*, *Ankrd1*),  
300 and 2) ectopic enrichment of ExEMeso and other mesoderm associated genes (*Hand1*, *Anxa2*,  
301 *Amot*, *Vim*, *Tagln2*). We used multiplexed fluorescent RNA *in situ* hybridization to validate the  
302 spatial domains of differentially expressed genes in Late-stages, and confirmed presence of  
303 *Myf7*<sup>+</sup> cells co-expressing *Smarcd3-F6* in the posterior distal compartment of *Mesp1* KO  
304 embryos (Fig. 4I) along with absence of *Nkx2-5* expression in *Mesp1* KO embryos (Fig. 4J). We  
305 also showed ectopic *Anxa2* expression into the embryo proper, overlapping with *Smarcd3-F6*<sup>+</sup>  
306 cells in their posterior position in *Mesp1* KO embryos, in contrast to the anterior extraembryonic-  
307 restricted expression pattern of controls (Fig. 4K). These results further highlight that *Mesp1* KO  
308 CPCs ectopically express non-cardiac mesodermal genes, and reveals that *Mesp1* KO CPCs

309 progress towards CM fates incompletely in part through a failure to express requisite TFs. Thus,  
310 *Mesp1* KO CPCs reach a cardiogenic breakpoint during gastrulation prior to cardiac crescent  
311 formation.

312

### 313 **scATAC-seq analysis reveals a regulatory barrier in *Mesp1* KO mesoderm progression** 314 **towards cardiomyocyte fates**

315 To characterize the regulatory landscape prohibiting *Mesp1* KO cells from progressing  
316 fully towards CM fates, we turned to single cell Assay for Transposase Accessible Chromatin  
317 (scATAC-seq) (Buenrostro et al., 2015) of Middle- and Late-stage embryos ages E7.5 - E7.75  
318 (Fig. S10). We processed whole embryos and performed preliminary atlasing analysis in ArchR  
319 (Granja et al., 2021). We utilized integration with the complementary whole embryo scRNA-seq  
320 dataset along with chromatin accessibility profiles near marker genes (gene scores) to subset  
321 mesodermal cell type clusters (Fig. S11A-D, Table S6A) in order to generate a subset scATAC-  
322 seq atlas of 16 mesodermal cell types (Fig. 5A). *Mesp1* KO and controls had strikingly divergent  
323 regulatory landscapes (Fig. 5B). *Mesp1* KO cells were confined to scATAC-seq clusters  
324 representing epiblast (Epi), mesendoderm, and LPM cell types, while control cells were  
325 represented in the LPM cell types, the more mature cardiac progenitor (CP) and CM cluster,  
326 and mesodermal derivative cell types (Fig. 5A-C). Integration with the complementary  
327 mesoderm scRNA-seq dataset (Table S6B), visualization of key marker gene scores and  
328 integrated expression (Fig. 5D-E), and Jaccard indexing (Fig. S12) were used to assign relative  
329 cell identities to each mesoderm scATAC-seq cluster (Fig. 5C). While some cardiac TFs such  
330 as *Nkx2-5* were not active in *Mesp1* KO cells, others such as *Tbx5* had chromatin accessibility  
331 in *Mesp1* KO cells, but integrated expression only in control CM/CP cells (Fig. 5B,D-E). Other  
332 cardiac TFs *Hand1* and *Gata4* had similar activity between *Mesp1* KO and control cells (Fig.  
333 5B,D-E), and while *Mesp1* KO cells downregulated *Smarcd3* and *Myl7* expression, chromatin  
334 accessibility for these genes was similar between genotypes (Fig. 5B,D-E). These results  
335 indicate a perdurance of active chromatin states in the steps preceding cardiogenic  
336 differentiation.

337 To interrogate the developmental relationship between *Mesp1* KO cells failing to mature  
338 and control CMs, we performed an ArchR trajectory inference analysis assessing pseudotime  
339 along the cardiac fate path. We defined a trajectory backbone in the *Mesp1* KO cells traversing  
340 the expected differentiation path of Epi, *Eomes*+ mesendoderm (EomesME), *Mesp1*+  
341 mesoendoderm (Mesp1ME), lateral plate mesoderm (LPM2, LPM1), to cardiac progenitors (CP)

342 and cardiomyocytes (CM) clusters. This trajectory analysis revealed that while *Mesp1* KO cells  
343 traversed the normal path from epiblast to LPM, they abruptly failed to progress further towards  
344 CPs and CMs (Fig. 5F). Notably, the most mature cell identity *Mesp1* KO cells achieved (LPM1)  
345 also contained control cells capable of progressing to CPs past this point where *Mesp1* KO cells  
346 halted, indicating the LPM1-to-CP transition represents the breakpoint in cardiogenesis for  
347 *Mesp1* KO cells (Fig. 5F).

348 From this trajectory analysis, we assessed dynamic shifts in the correlation of TF gene  
349 scores and gene expression with corresponding TF motifs in accessible chromatin peaks across  
350 pseudotime (Fig. S13A-B) to reveal a biologically-sensical order of TF regulators involved in  
351 cardiogenesis. Notably, TFs represented in early pseudotime and *Mesp1* KO cells (*Lhx1*, *T*,  
352 *Eomes*, *Zic2/3*, *Pitx2*, *Isl1*, Fig. S13A-B) were consistent with early gastrulation mesodermal  
353 regulatory networks, indicating that aspects of these networks are either *Mesp1*-independent or  
354 resilient to *Mesp1* loss. TFs represented in later pseudotime (*Hand2*, *Gata4/5/6*, *Hoxb1*, Fig.  
355 S13A-B) were concordant with downregulated gene expression in *Mesp1* KO CPCs and  
356 mesoderm by scRNA-seq (Fig. 2-4), suggesting that failed induction of these TFs and their  
357 programs is either *Mesp1*-dependent or vulnerable to secondary effects of *Mesp1* loss.

358 To ascertain which gene regulatory networks were present in which cell types, and thus  
359 which genotypes, along the cardiogenic trajectory, we performed an orthogonal analysis to  
360 identify putative positive transcriptional drivers (Fig. 5G, Table S6C) and visualized resulting  
361 TFs' motif enrichments in UMAP space (Fig. 5H, S13A-B). In particular, the *Mesp1* KO Epi  
362 cluster is driven in part by pluripotency TFs *Pou5f1* and *Mesp1*-cofactor *Zic3* (Lin et al., 2022)  
363 (Fig. 5D-E, 5H). Mesendoderm TFs *Eomes* and *Zic3* were drivers of *EomesME* and *Mesp1ME*  
364 (Fig. 5D-E, 5H). ExEM and first heart field TF *Hand1* appeared in the "last-stop" LPM1 cell types  
365 where *Mesp1* KO cells failed to progress towards more mature cardiac fates (Fig. 5D-E, 5H),  
366 consistent with the upregulated expression observed in *Mesp1* KO CM-fated cells (Fig. 4D-F).  
367 While *Gata* motifs were present in LPM2 and LPM1, the latter of which contains both genotypes,  
368 *Gata4* was most enriched in the later cardiac fate destinations of CPs and CMs (Fig. 5H). This  
369 result coupled with the *Gata4*'s representation in late trajectory pseudotime (Fig. S13A) and  
370 downregulated expression in cardiac-fated *Mesp1* KO mesoderm cells (Fig. 4F) likely signifies  
371 *Mesp1*-dependent induction and/or influence of *Gata* factor-associated networks within  
372 emerging CMs. Indeed, *Gata4* was shown to be activated by *Mesp1* during *in vitro*  
373 differentiation (Soibam et al., 2015), and while *Gata4* binds the minority of *Mesp1*-bound  
374 enhancers, *Gata4* binds nearly half of enhancers opened following *in vitro* induction of *Mesp1*



375 (Lin et al., 2022). Separately, *Mesp1* target gene *Hoxb1*'s motif was distinctly expressed in  
376 PrSoM cell types, coincident with the “late phase” role for *Mesp1* (Lin et al., 2022; Haraguchi et  
377 al., 2001) in mesoderm diversification beyond the cardiac lineage (Fig. 5H). The preponderance  
378 and accordance of these results supports that early cardiogenic phases proceed resilient to  
379 *Mesp1*-loss, however *Mesp1* KO cells cannot proceed to later phases.

380         Given enrichment of *Eomes* motifs, gene score, and gene expression in mesendoderm  
381 clusters (Fig. 5D-E, 5I), its apparent role as a positive TF driver (Fig. 5G,I) and its direct  
382 involvement in *Mesp1* induction (Tosic et al., 2019; Costello et al., 2011; Alexanian et al., 2017;  
383 Guo et al., 2018; Probst et al., 2020), we investigated *Eomes* as a potential driver of *Mesp1*-  
384 independent early phases of cardiogenesis. *Eomes* directly binds *Myf7* regulatory regions (Tosic  
385 et al., 2019), and *Eomes* loss disrupts induction of *Myf7* (Costello et al., 2011), supporting that  
386 expression of *Myf7* in *Mesp1* KO CPCs (Fig. 2E,K, Fig. S5A,C-E, Fig. 3D, Fig. 4C-F,J) is  
387 regulated by *Eomes* at least partially independently of *Mesp1*. Furthermore, domains of *Eomes*  
388 expression anomalously endured in cardiogenic *Smarcd3*-F6+ regions and are ectopically  
389 expanded in lateral aspects of the embryo proper in cardiac-crescent staged *Mesp1* KOs (Fig.  
390 5I), indicating improper repression of *Eomes* in cardiogenic regions.

391         Taken together, these results describe a shift between mesendoderm and cardiac  
392 patterning regulatory programs during cardiogenesis. *Mesp1* KO cells are unable to traverse  
393 beyond LPM cell types to initiate cardiac patterning programs and instead retain gene  
394 expression indicative of earlier cardiac mesoderm regulatory programs. The perdurant  
395 expression of *Eomes* may be a driving mechanism for this halt in cardiogenesis.

396

### 397 **The disrupted regulatory landscape of *Mesp1* KO embryos is characterized by ectopic** 398 **endurance of mesendoderm gene programs**

399         To understand how the *Mesp1* KO disrupted regulatory landscape underlies the  
400 transcriptional barriers to progression towards more mature cardiac fates, we characterized cell  
401 type peak accessibility profiles and the motif enrichment within these peaks (Fig. S14A-B). We  
402 performed differential accessibility testing of peaks between cell types along the cardiac  
403 trajectory (Fig. S14C-G). Focusing specifically on the “last stop” for *Mesp1* KO cells, we  
404 compared motif enrichment within differential peaks of CMs/CPs containing only control and  
405 LPM1 containing both control and *Mesp1* KO cells (Fig. 6A). In agreement with motif enrichment  
406 scores for positive TF regulators (Fig. 5G, 5H), Gata and Mef2c motifs were among those  
407 enriched in the more mature cardiac fates, while motifs for cardiac differentiation and

408 myogenesis-promoting Tead factors were relatively enriched within LPM1, offering further  
409 explanation for retention of some myocyte identity within *Mesp1* KO CPCs (Fig. 6A, Fig. 2E, 2K,  
410 Fig. S5D, Fig. 4J) (Han et al., 2020; Akerberg et al., 2019). To measure correlations between  
411 the differential accessibility profiles behind these motifs and the complementary gene  
412 expression profiles of these cells, we performed an association analysis measuring the  
413 probability that peak accessibility near genes corresponds to gene expression. We applied this  
414 analysis to find an odds ratio of 16.7 for the probability that significantly differentially open peaks  
415 corresponded to upregulated gene expression (Q3, Fig. 6B) while significantly differentially  
416 closed peaks corresponded to downregulated gene expression (Q1, Fig. 6B) in CMs/CPs  
417 relative to LPM1. Thus, gene expression profiles enriched in control-only CMs/CPs (Q3: *Mef2c*,  
418 *Tbx5*, *Gata5*, *Nkx2-5*, *Tnnt2*, Fig. 6B) and transcriptional profiles of LPM1 cells (Q1: *Hand1*,  
419 *Anxa2*, *Cdx2*, *Krt8/18*, Fig. 6B) are associated with these cells' differing chromatin landscapes.

420 We next compared control-only CMs/CPs to *Mesp1* KO-only *Mesp1*ME and LPM2 (Fig.  
421 6C-D) because these cells had similar gene scores for the *Smarcd3* locus (Fig. 5D), a proxy for  
422 *Smarcd3*-F6 enhancer activity. Motifs including those for Gata and Hox factors were relatively  
423 enriched in CMs/CPs, and T-box motifs including *Eomes* and *T* were enriched in *Mesp1*ME and  
424 LPM2 (Fig. 6C). The correlation odds ratio of 8.08 highlighted corresponding peak accessibility  
425 and gene expression enrichment for CP patterning and CM genes in control CMs/CPs (Q3:  
426 *Nkx2-5*, *Tbx5*, *Wnt2*, *Mef2c*, *Meis1*, *Ttn*, *Tnnt2*) and relative enriched peak accessibility near  
427 upregulated genes for earlier cardiac mesoderm and mesendoderm programs in *Mesp1*ME and  
428 LPM2 *Mesp1* KO-only cells (Q1: *Tdgf1*, *Fgf3*, *Eomes*, *Mixl1*, *T*, *Krt8*, *Hand1*, *Pou5f1*) (Fig. 6D).

429 Applying this analysis paradigm to multiple pairwise comparisons along the cardiogenic  
430 trajectory (Fig. S14H-M) showed that the predominant regulatory signature of control CMs/CPs,  
431 is characterized by TFs such as *Gata4/5/6*, *Hoxb1*, *Mef2c*, *Foxf1*, and *Tbx5*, which are required  
432 for initiation of cardiac patterning and morphogenesis programs upon formation of the cardiac  
433 crescent, subsequent heart fields, and higher level organogenesis (Pikkarainen et al., 2004;  
434 Kokkinopoulos et al., 2015; Bruneau, 2013; Stefanovic et al., 2020; Harvey, 2002; Kelly,  
435 Buckingham & Moorman, 2014). *Mesp1* KO cells were unable to activate these same regulatory  
436 programs, instead retaining TFs for mesendoderm and other mesoderm networks (*T*, *Eomes*,  
437 *Hand1*) (Fig. S14H-M).

438 To visualize regulatory interactions between chromatin accessibility and integrated gene  
439 expression agnostic of differential accessibility and expression testing between specific cell  
440 types, we utilized the ArchR pipeline's orthogonal "peak2gene" linkage approach (Granja et al.,

441 2021). This linkage prediction method identified both known and uncharacterized distal  
442 regulatory elements (Fig. 6E-J). The *Smarcd3*-F6 enhancer (Devine et al., 2014) expectedly  
443 showed linkage to *Smarcd3* and similar accessibility across cardiogenesis, including the *Mesp1*  
444 KO cells *Mesp1*ME, LPM2 (Fig. 6E), consistent with our detection of the transgene by scRNA-  
445 seq.

446 Accordant with the modular enhancer landscape of *Nkx2-5*, multiple peak linkages were  
447 defined for the *Nkx2-5* locus, including two distal uncharacterized regions (Fig. 6F). Two  
448 linkages were appropriately mapped to the characterized *Gata4*-, *Nfat*-, *Mesp1*/*Mzf1*-, and *Isl1*-  
449 regulated 9 kb-upstream *Nkx2-5* cardiac enhancer sequence (*Nkx2-5*-AR1) (Lien et al., 1999;  
450 Chen & Cao, 2009; Clark et al., 2013; Doppler et al., 2014; Bondue et al., 2008) and the distal-  
451 linked AR1 peak was increased in control CM/CP cells only (Fig. 6F). Similarly, the *Gata*-,  
452 *Smad4*-, *Nfat*-, *Isl1*-regulated *Nkx2-5*-AR2 enhancer (Searcy et al., 1998; Liberatore et al., 2002;  
453 Lien et al., 2002) and the two uncharacterized linked regions ~25 kb and ~30 kb-upstream of  
454 the TSS showed enriched accessibility in control CM/CP cells (Fig. 6F) while *Gata4*- and  
455 *Smad1/4*-responsive 6 kb-upstream enhancer (*Nkx2-5*-GS) (Brown et al., 2004) didn't show  
456 accessibility in any cells (Fig. 6F). These results are consistent with absence of *Nkx2-5* in  
457 *Mesp1* KO embryos (Fig. 4), underscore the complexity of regulation on this critical cardiac TF,  
458 and provide further evidence for the regulatory shift between LPM1 and CM/CP cells (Fig. 5F)  
459 that *Mesp1* KO cells are unable to progress through.

460 Examination of the *Gata5* locus revealed a linkage to the characterized cardiac crescent  
461 and mesodermal derivatives enhancer (*Gata5*-CC-meso) (MacNeill et al., 2000) as well as  
462 several uncharacterized linked distal elements with accessibility in *Mesp1*ME, LPM2, LPM1, and  
463 CM/CP cells (Fig. 6G). Several characterized *Gata4* enhancer regions were linked, including  
464 lateral mesoderm enhancer *Gata4*-G2 (Rojas et al., 2005) and cardiac crescent enhancer  
465 *Gata4*-G9 (Schachterle et al., 2012). *Foxf1* and *Gata4*-bound enhancer *Gata4*-C2 showed  
466 enriched accessibility in mesendoderm *Mesp1* KO cells, while ETS-activated *Gata4*-G9 was  
467 similarly accessible between between *Mesp1*ME, LPM2, LPM1, and CM/CPs (Fig. 6H),  
468 highlighting retention of active chromatin states preceding cardiac patterning and differentiation  
469 despite loss of *Mesp1*.

470 Evaluation of loci for mesendoderm genes *Eomes* and *Tdgf1*, which ectopically perdure  
471 in *Mesp1* KO embryos, showed a corresponding pattern of enriched linked peaks in *Mesp1* KO  
472 cell types (Fig. 6I). The characterized distal element *Meteor*, a lncRNA (Alexanian et al., 2017),  
473 was linked to *Eomes* with greatest accessibility enrichment in Epi, *Eomes*ME, and *Mesp1*ME

474 *Mesp1* KO cells (Fig. 6I). Similarly, characterized PSEa, PSEb, and VME regulatory regions  
475 (Simon et al., 2017) were linked (Fig. 6I), supporting that the early cardiac mesoderm  
476 transcriptional landscape is intact despite *Mesp1* absence, however retained later in  
477 development than it should be for the age of these embryos. Upstream of *Tdgf1*, a previously  
478 characterized enhancer sequence and direct transcriptional target of Mef2c (Barnes et al., 2016)  
479 displayed enrichment of proximal peaks in *Mesp1* KO cells (Fig. 6J), which we confirmed by  
480 increased *Tdgf1* enhancer transgene activity in posterior domains of E7.5 *Mesp1* KO embryos  
481 (Fig. 6K). Increased *Tdgf1* enhancer activity mimicked the enriched *Tdgf1* gene expression in  
482 *Mesp1* KO embryos (Fig. 2F-G), further supporting the hypothesis that early programs are de-  
483 repressed in absence of *Mesp1*.

484 We examined additional linked peak profiles around differentially expressed genes (Fig.  
485 S15). We detected linkages between *Mesp1* and the characterized “EME” enhancer (Haraguchi  
486 et al., 2001; Ajima et al., 2021; Costello et al., 2011; Guo et al., 2018) with enrichment in *Mesp1*  
487 KO cell types likely indicative of retained early chromatin landscape or de-repression of the  
488 locus without appropriate regulation from downstream targets (Fig. S15A). We detected  
489 linkages to 3 uncharacterized distal regions near the *Gata6* locus, as well as the Nkx2-5-  
490 targeted enhancer regions (Molkentin et al., 2000) which had similar accessibility profiles across  
491 *Mesp1* KO Mesp1ME, LPM2 cells, and the LPM1 cells containing both genotypes (Fig. S15B).  
492 We noted linkages to multiple characterized *Hand1* enhancer regions (Vincentz et al., 2021,  
493 2019; George & Firulli, 2021) across both genotypes and multiple cell types, with accessibility  
494 for some enhancers decreasing in CM/CP cells (Fig. S15C), consistent *Hand1*'s more robust  
495 activity in LPM1 cells (Fig. 5D,E,H). Peaks with similar accessibility across Mesp1ME and LPM  
496 cell types containing both genotypes were detected in linkages near *Tbx5*, including the Tbx5-  
497 CRE16 (Smemo et al., 2012), and downregulated but retained structural myocyte genes *Tnnt2*  
498 (Fig. S15E) and *Myl7* (Fig. S15F). Increased accessibility for *Anxa2*-linked peaks in *Mesp1* KO  
499 LPM2 cells and control/*Mesp1* KO LPM1 cells contrasted near-inaccessibility in control CM/CPs  
500 (Fig. S15G), consistent with the upregulated *Anxa2* expression in Late-stage embryo  
501 cardiogenic regions (Fig. 4K). Downstream distal peaks were linked to *Mesp1*-induced EMT-  
502 gene *Snai1* (Fig. S15H) (Lin et al., 2022), including the *Mesp1*-binding site. These peak2gene  
503 linkage analyses further illustrate the correlation between differentially expressed genes and the  
504 altered chromatin landscape in *Mesp1* KO mesoderm cells that prevents progression towards

505 mature cardiac fates, but also highlights that despite this disrupted regulatory landscape, some  
506 distal-regulatory elements relevant to early cardiogenesis are still retained.

507

## 508 **DISCUSSION**

509 We generated scRNA-seq and scATAC-seq datasets from whole mouse embryos in a  
510 timeline of gastrulation, creating a valuable *in vivo* resource for high-resolution studies of gene  
511 regulatory networks in early embryonic development. We utilized computational detection of the  
512 CPC-labeling transgenes to focus on early cardiac specification, showing that while *Mesp1* KO  
513 embryos are capable of initiating and progressing through early cardiac mesoderm specification,  
514 a *Mesp1*-dependent regulatory barrier prevents *Mesp1* KO CPCs from progressing completely  
515 towards CM fates. We characterized improper repression of early mesendoderm programs at  
516 this breakpoint, such as how absence of *Mesp1* leads to enduring *Eomes* activity, which in turn  
517 promotes ectopic perdurance of mesendoderm transcriptional networks when cardiac crescent-  
518 staged embryos should instead be upregulating cardiac patterning programs. Additionally, this  
519 disrupted regulatory landscape likely contributes to *Mesp1* KO cardiac mesoderm and CPCs  
520 ectopically expressing non-cardiac mesoderm genes. Despite this ectopic expression, CPCs do  
521 not appear to deviate from a cardiac-directed mesodermal fate path. Ultimately, while *Mesp1*  
522 KO embryos specify early cardiac lineage cell types, their deficient regulatory landscapes prove  
523 prohibitive against further lineage development (Fig. 7).

524 Positioning *Mesp1* as a master transcriptional regulator of early cardiac fate is largely informed  
525 by overexpression studies (Chiapparo et al., 2016; Bondue et al., 2008; Lindsley et al., 2008;  
526 Wu, 2008; Kelly, 2016; Bondue & Blanpain, 2010; Lin et al., 2022) in contrast to earlier *in vivo*  
527 studies which suggested a *Mesp1*-dependent role for cardiac mesoderm migration (Saga,  
528 Kitajima & Miyagawa-Tomita, 2000). Indeed, in this work we note downregulation of migratory  
529 genes in *Mesp1* KO cells, and a companion work demonstrates that *Mesp1*-dependent  
530 migration patterns are critical for spatial organization of CPCs during cardiogenesis (Dominguez  
531 et al., 2022). Additional interpretations in *Mesp1/Mesp2* double knockouts underscore the  
532 potential for more complex networks of TF dependency in cardiac specification not fully  
533 explained by regulatory hierarchies (Ajima et al., 2021; Kitajima et al., 2000; Saga, 1998). While  
534 the concept of a “master transcription factor” is a broadly applied hierarchical framework for  
535 interrogation of gene regulatory networks (Cai et al., 2020; Davis & Rebay, 2017; Yin & Wang,  
536 2014), and *Mesp1*’s coincident expression in emerging CPCs supports an instructive role for  
537 *Mesp1* in cardiogenesis, this model likely oversimplifies cardiogenesis. Indeed, our high



538 resolution, single cell transcriptional and epigenomic analyses reveal both transcriptional  
539 resilience and vulnerability of early cardiogenesis in a regulatory landscape lacking *Mesp1*.

540 Transcriptional profiling of *Smarcd3*-F6+ cells highlighted that *Mesp1* KO cells were  
541 mostly represented in cell types of early cardiogenesis and in Early- and Middle-stage embryos,  
542 indicating that *Mesp1* KO CPCs not only initiate but also progress through early stages of  
543 cardiac specification. This finding contrasts with the *Mesp1*-dependent failure to exit  
544 pluripotency previously highlighted (Lescroart et al., 2018). We interpret the failed induction of  
545 *Nkx2-5*, which is critical for patterning of the first and second heart fields (Harvey, 2002), and  
546 the inappropriate levels of *Gata* factors in *Mesp1* KO CPCs as representing a breakpoint  
547 between phases of the cardiogenic process.

548 To characterize this breakpoint, we utilized complementary scATAC-seq and scRNA-seq  
549 mesoderm datasets to conclude that mesendoderm regulatory programs, instructed at least  
550 partially by *Eomes*, are responsible for the initiation and progression through Middle phases of  
551 cardiac specification prior to cardiac crescent formation. However, the perdurance of these  
552 programs coupled with the failure of LPM to properly migrate anterior-laterally in *Mesp1* KO  
553 embryos leads to aberrant upregulation and ectopic expression of early cardiac mesoderm, non-  
554 cardiac mesoderm, and mesendoderm genes and TFs. Additionally, we hypothesize that the  
555 posterior positioning of CPCs in *Mesp1* KO embryos further compounds cardiac maturation and  
556 CPC transcriptional profiles via improper exposure to signaling gradients and growth factors.  
557 The dysregulated identity of *Mesp1* KO cardiac mesoderm in this phase between Middle and  
558 Late embryonic stages stalls *Mesp1*-deficient cardiogenesis due to failed induction of cardiac  
559 progenitor patterning, morphogenesis, and CM maturation regulatory programs.

560 Although this developmental breakpoint is observed between E7.5-E7.75, well after  
561 transient *Mesp1* expression has declined, these processes appear to be *Mesp1*-dependent.  
562 Possible explanations for this phenomenon are 1) improper repression of earlier regulators,  
563 such as *Eomes*; 2) compounded, *Mesp1*-dependent secondary effects influencing de-repression  
564 or ectopic activation; or 3) *Mesp1* KO CPCs are exposed to improper embryonic signaling cues  
565 as a result of their aberrant posterior localization. Future studies with additional genetic models  
566 and assays of embryos representing earlier developmental timepoints are needed to  
567 disentangle these possibilities.

568 Overall, our work shows that complex transcriptional networks and interdependent  
569 hierarchies govern CPC emergence and differentiation. We characterize an initial,  
570 transcriptionally resilient, phase of CPC specification and identify that the epigenomic landscape

571 necessary for CPCs to transition from LPM to CPs and CMs is dependent on upstream Mesp1  
572 activity. Our results point to generalizable transcriptional regulatory principles during gastrulation  
573 for the allocation of precursor cells from embryonic germ layers towards restricted fates, and  
574 differentiation to distinct functional cell types.

575

576

577 **MAIN FIGURE LEGENDS**

578

579 **Fig. 1. Identification of the emerging cardiogenic mesoderm using fluorescent**  
580 **transgenes in whole embryo single cell transcriptomic data.** (A) Uniform manifold  
581 approximation and projection (UMAP) of 94,824 cells representing 27 cell types from  
582 gastrulating embryos. (B) UMAP labeled with embryo ages included in atlas and representative  
583 embryo images showing domains of fluorescent Ai14 (*Mesp1* lineage) and eGFP (*Smarcd3-F6*)  
584 transgenes. Images not scaled. (C) UMAP feature plots showing expression of fluorescent  
585 transgenes isolated to mesodermal cell types. (D) UMAP of 34,724 mesodermal cells subsetted  
586 from full atlas, representing 30 cell types. (E) UMAP labeled with embryo ages and (F) UMAP  
587 feature plots showing expression of fluorescent transgenes, Ai14 for *Mesp1* lineage and eGFP  
588 for *Smarcd3-F6+* CPCs.

589

590 **Fig. 2. Transcriptional profiles of *Smarcd3-F6+* cells in *Mesp1* KO embryos.** (A)  
591 Fluorescence *in situ* hybridization for *Smarcd3-F6* expression (green) in cardiac crescent stage  
592 (E7.75) *Mesp1* KO and control littermate embryos. (B) UMAP atlas of 4,868 *Smarcd3-F6+* cells  
593 representing 24 cell types. (C-D) UMAPs colored by (C) genotype and (D) relative  
594 developmental stages, Early ( E6.0-E6.5), Middle (late E6.5 – E7.5), Late (late E7.5- early  
595 E7.75). (E) Dotplot representation of gene expression across genotypes at relative  
596 developmental stages. Size of dot denotes percent of cells expressing gene, color of dot  
597 represents average gene expression. (F-K) Multiplexed fluorescence *in situ* hybridization for  
598 *Smarcd3-F6* (green) and (F-G) *Tdgf1* (red) in representative (F) Early and (G) Middle stages,  
599 (H) *Fgf8* (red) in Middle stages, (I-J) *Eomes* (red) in (I) Early and (J) Middle stages, (K) *Myl7*  
600 (red) in Early stages. Arrowheads denote *Smarcd3-F6+* cardiogenic regions. Scale bars are  
601 100  $\mu$ m.

602

603 **Fig. 3. Transcriptional profiles of cardiac mesoderm in *Mesp1* KO embryos.** Mesoderm  
604 scRNA-seq UMAP atlases for (A) Early (5,504 cells), (F) Middle (7,666 cells), and (K) Late  
605 (22,622 cells) developmental stages. Associated UMAPs for each stage atlas colored by (B, G,  
606 L) genotype and (C, H, M) *Smarcd3-F6*-eGFP expression. Differentially expressed genes in  
607 Early mesoderm in (D) LSMeso2 and (E) EomesPSMeso. Differentially expressed genes in  
608 Middle mesoderm in (I) LSMeso2 and (J) *Mesp1*ME. Differentially expressed genes in Late



609 mesoderm in (N) Meso2, (O) Meso1, and (P) postLPM. Significant changes are denoted with  
610 adjusted p values < 0.05.

611

612 **Fig. 4. Pseudotime trajectory analysis of mesoderm fates in *Mesp1* KO embryos.** (A) URD  
613 pseudotime tree for fate progression towards mature mesoderm fates colored by genotypes  
614 together and (B) separately. (C) Overlay of cardiac marker gene expression. (D-H) Differentially  
615 expressed genes in cells of shared fates and pseudotime identities; (D) CM fated cells, (E)  
616 CardiacMeso fated cells, (F) predecessors to CM and CardiacMeso fates, (G) predecessors to  
617 LPM derivate fates, (H) comparison of mutant fate branch C22 to predecessors to CardiacMeso  
618 fates. (I-J) Multiplexed fluorescence *in situ* hybridization for *Smarcd3-F6* (green) and (I) *Myf7*  
619 (red) and (J) *Nkx2-5* (red), and (K) *Anxa2* in cardiac crescent stage embryos. Arrowheads  
620 denote *Smarcd3-F6*+ cardiogenic regions in *Mesp1* KO embryos. Scale bars are 100  $\mu$ m.

621

622 **Fig. 5. Characterizing transcriptional drivers in *Mesp1* KO mesoderm during**  
623 **cardiogenesis.** (A) Mesoderm scATAC-seq atlas of 16 cell types with overlays for (B)  
624 genotypes and (C) relative cell type identities from integration of a complementary scRNA-seq  
625 dataset. (D) GeneScoreMatrix plots for chromatin accessibility around gene loci and (E)  
626 GeneIntegrationMatrix plots for scRNA-seq integrated gene expression for cardiac mesoderm  
627 marker genes and TFs. (F) Pseudotime values for cells along the *Mesp1* KO cardiac-fate  
628 trajectory path. (G) Maximum z-score delta for TF motif variance between clusters correlated to  
629 gene expression within clusters to identify positive TF drivers (red). (G-H) Highlighted positive  
630 regulator TFs' motif z-scores mapped in UMAP space, with associated position weight matrix  
631 plots. (I) Multiplexed fluorescence *in situ* hybridization for *Smarcd3-F6* (green) and *Eomes* (red)  
632 in cardiac crescent stage embryos. Arrowheads denote cardiogenic regions in *Mesp1* KO  
633 embryo. Scale bars are 100  $\mu$ m.

634

635 **Fig. 6. Disrupted regulatory landscape of *Mesp1* KO mesoderm.** (A,C) Motifs enriched in  
636 differentially accessible peaks between (A) CM/CP vs. LPM1 and (C) CM/CP vs *Mesp1*ME and  
637 LPM2. (B,D) Plots for peak, gene associations showing correlations between differential peak  
638 accessibility and gene expression in comparisons between cells type1 vs type2. Q3 peak, gene  
639 pairs represent significantly more accessible peaks paired with upregulated gene expression in  
640 type1 cells. Q1 peak, gene pairs represent significantly more accessible peaks paired with

641 upregulated gene expression in type2 cells. Odds ratio denotes probability for observed  
642 peak,gene relationships. (B) Peak,gene association plot for cells in CM/CP vs LPM1  
643 comparison and (D) in CM/CP vs Mesp1ME and LPM2 comparison. (E-J) Peak2Gene linkage  
644 browser tracks for cell types showing predicted regulatory connections between distal  
645 accessible regions (Peaks) and nearby genes. Shaded bars denote predicted distal regulatory  
646 regions; \*denotes characterized elements; red\* denotes regions with Mesp1-binding; \*\*denotes  
647 uncharacterized elements. Characterized elements named when available. (E) *Smarcd3* linkage  
648 to the “F6” enhancer. Peak linkages to genes (F) *Nkx2-5*, (G) *Gata5*, (H) *Gata4*, (I) *Eomes*, and  
649 (J) *Tdgf1*. (K) X-gal stain for activity of characterized *Tdgf1* enhancer, scale bars are 200  $\mu$ m.  
650

651 **Fig. 7. Model for transcriptional regulatory landscape of cardiogenesis and loss of**  
652 ***Mesp1*.** Schematic model of gene regulatory program phases during cardiac mesoderm  
653 specification and differentiation. *Mesp1* KO cardiac mesoderm cells exit pluripotency, induce  
654 early cardiac specification genes under control of mesendoderm programs, yet fail to activate  
655 critical cardiac TFs at cardiac crescent stages to initiate cardiac patterning programs.  
656  
657

658 **SUPPLEMENTAL FIGURE LEGENDS**

659 **Fig. S1. Fluorescent lineage transgenes in whole embryos.** Images of all embryos utilized in  
660 generation of wildtype gastrulation atlas. *Mesp1* lineage visualized by Ai14 fluorescent reporter  
661 transgene. *Smarcd3-F6* visualized by eGFP fluorescent reporter transgene. Images not  
662 acquired and processed identically. Embryos distinguished with \* lacked *Mesp1* lineage tracing  
663 by Ai14 transgene.

664

665 **Fig. S2. Cell type cluster gene expression profiles.** (A) Dotplot denoting marker genes and  
666 cell type annotations by cluster in full embryo wildtype gastrulation atlas. (B) Dotplot denoting  
667 marker genes and cell type annotations by cluster in mesoderm wildtype atlas. Size of dot  
668 represents percent of cells expressing gene and color represents average expression level.  
669 Cluster number used to denote cell types when annotation was not possible.

670

671 **Fig. S3. Co-expression of cardiac mesoderm genes in *Smarcd3-F6+* cell types.** UMAP  
672 feature plots of wildtype mesoderm atlas showing gene expression of (A) early cardiac and  
673 mesoderm genes *T*, *Eomes*, *Mesp1*, *Mixl1*, *Smarcd3*, (B) structural cardiomyocyte genes *Myl7*,  
674 *Tnnt2*, *Actc1*, and (C) cardiac transcription factors *Tbx5*, *Hand1*, *Nkx2-5*, *Gata5*.

675

676 **Fig. S4. Transcriptional profiles of *Smarcd3-F6+* cells.** (A) Dotplot denoting marker genes  
677 and cell type annotations by cluster in *Smarcd3-F6+* cells atlas. (B) Dotplot representation of  
678 differential gene expression between genotypes across all cells. Size of dot denotes percent of  
679 cells expressing gene, color of dot represents average gene expression. (C) Barplot denoting  
680 distribution of number of cells from genotypes across cluster identities for *Smarcd3-F6+* atlas.

681

682 **Fig. S5. Differentially expressed genes in *Smarcd3-F6+* cells from *Mesp1* KO embryos.** (A)  
683 Overlay of gene expression in UMAP space for early cardiac marker genes *Tdgf1*, *Eomes*, *Fgf8*,  
684 *Myl7*. (B-E) Differential gene expression profiling highlights similar cardiac marker gene  
685 expression between genotypes in (B) preCardiacMeso, (C) LSMeso, (D) LPM-ExEM, and (E)  
686 endoderm-like1 cells. (B-E) Differentially expressed genes plotted with adj p values < 0.05.

687

688 **Fig. S6. Identification of emerging cardiac mesoderm in control and *Mesp1* KO embryo**  
689 **scRNA-seq data.** (A) Atlas UMAP of 96,027 cells representing whole embryos with overlay of  
690 (B) genotypes (C) relative developmental stages Early, Middle, and Late. (D) UMAPs showing

691 expression of *Mesp1* lineage transgene Ai14, CPC-specific *Smarcd3*-F6 transgene eGFP,  
692 cardiac mesoderm markers *Mesp1*, *Nkx2-5*, endoderm markers *Sox17*, *Sox7*, neural markers  
693 *Pax3*, *Ptn*. (E) Atlas UMAP of 35,792 mesoderm cells with overlay of (F) genotypes and (E)  
694 relative developmental stages. (H) UMAPs showing gene expression of cardiac and mesoderm  
695 genes. (I) Doplots denoting marker genes and cell type annotations by cluster in mesoderm atlas.  
696 Size of dot represents percent of cells expressing gene and color represents average  
697 expression level. Cluster number used to denote cell types when annotation was not possible.  
698

699 **Fig. S7. Cell type labels in mesoderm developmental stages atlases.** (A) Doplots denoting  
700 marker genes and cell type annotations by cluster in Early mesoderm atlas. (B) Doplots denoting  
701 marker genes and cell type annotations by cluster in Middle mesoderm atlas. (C) Doplots  
702 denoting marker genes and cell type annotations by cluster in Late mesoderm atlas. Size of dot  
703 represents percent of cells expressing gene and color represents average expression level.  
704

705 **Fig. S8. Disrupted organization of mesoderm in Middle stage *Mesp1* KO embryos.** (A)  
706 Overlay of *Mesp1*, *Foxc2*, and Ai14 *Mesp1*-lineage gene expression in cell types of Middle  
707 mesoderm atlas UMAP. (B) Immunostaining and Light Sheet Confocal microscopy for *Foxc2*  
708 (magenta), *Smarcd3*-F6 (green) and *Mesp1* via Cre detection (blue) in Middle stage embryos  
709 (~E6.75). Arrowheads denote domain boundaries in control and disruption in *Mesp1* KO  
710 embryo. Scale bars are 100  $\mu$ m.

711  
712 **Fig. S9. URD trajectory for pseudotime ordering of control and *Mesp1* KO mesoderm.** (A)  
713 URD tree labeled with relative developmental stages of embryos. (B) URD tree labeled *with*  
714 *Mesp1* lineage transgene reporter Ai14. (C) URD trees labeled with gene expression of various  
715 mesodermal genes and TFs involved in regulatory cardiogenesis.

716  
717 **Fig. S10. Middle- and Late-stage embryos assayed for scATAC-seq.** Images of embryos  
718 utilized in generation of control and *Mesp1* KO scATAC-seq dataset. *Mesp1* lineage visualized  
719 by endogenous Ai14 fluorescent reporter transgene. *Smarcd3*-F6 visualized by endogenous  
720 eGFP fluorescent reporter transgene. Images not acquired and processed identically.

721  
722 **Fig. S11. Identification of mesoderm in scATAC-seq data from whole embryos.** (A) Whole  
723 embryo scATAC-seq atlas with overlays for (B) genotype and (C) relative cell type identities

724 from integration of the complementary scRNA-seq dataset. (D) GeneScoreMatrix plots for  
725 chromatin accessibility around gene loci of various mesoderm, cardiac, endoderm, ectoderm,  
726 neuronal marker genes.

727

728 **Fig. S12. Jaccard Similarity Index for scATAC-seq cluster annotation.** Scaled strength of  
729 similarity match for scRNA-seq complementary dataset label transfer (rows) onto scATAC-seq  
730 clusters (columns). Values 0-1 indicate strength of similarity match for relative cell type  
731 annotations. Greater values indicate stronger label matching.

732

733 **Fig. S13. Integrative scATAC-seq trajectory pseudotime correlation analysis.** Heatmap  
734 visualizations of dynamic shifts along pseudotime progress for correlation matrices (A) between  
735 accessibility near TF loci, GeneScoreMatrix, with associated TF motifs, MotifMatrix and (B)  
736 between TF gene expression, GeneIntegrationMatrix, with associated TF motifs, MotifMatrix.  
737 Motifs in red represent selected putative positive regulators.

738

739 **Fig. S14. Differential peak and motif enrichment in cardiogenic cell types of control and**  
740 ***Mesp1* KO mesoderm cells.** (A) Heatmap for Marker Peak (FDR  $\leq 0.05$ , Log2FC  $\geq 1$ )  
741 accessibility profiles of mesoderm cell types comprised of control, *Mesp1* KO, or both  
742 genotypes. (B) Heatmap for enriched motifs (FDR  $\leq 0.05$ , Log2FC  $\geq 1$ ) in cluster Marker  
743 Peaks. (C-G) MA plots for pairwise comparisons of differential peak enrichment between  
744 cardiogenic cell types with genotypes noted. (H, J, L) Motifs enriched in differentially accessible  
745 peaks between noted cell types and cluster genotypes. (I, K, M) Plots for peak, gene  
746 associations showing correlations between differential peak accessibility and gene expression in  
747 comparisons between cells type1 vs type2. Q3 peak, gene pairs represent significantly more  
748 accessible peaks paired with upregulated gene expression in type1 cells. Q1 peak, gene pairs  
749 represent significantly more accessible peaks paired with upregulated gene expression in type2  
750 cells. Odds ratio denotes probability for observed peak, gene relationships. (I) Peak, gene  
751 association plot for cells in CMCP vs LPM2 comparison, (K) CMCP vs *Mesp1*ME comparison,  
752 (M) LPM2 vs LPM1 comparison.

753

754 **Fig. S15. Peak2Gene linkage plots for dysregulated genes in *Mesp1* KO embryos.**

755 Peak2Gene linkage browser tracks for cell types showing predicted regulatory connections  
756 between distal accessible regions (Peaks) and nearby genes. Shaded bars denote predicted

757 distal regulatory regions; \*denotes characterized elements; red\* denotes regions with Mesp1-  
758 binding; \*\*denotes uncharacterized elements. Characterized elements named when available.  
759 Peak linkages to genes (A) *Mesp1* (B) *Gata6*, (C) *Hand1*, (D) *Tbx5*, (E) *Tnnt2*, (F) *Myl7*, (G)  
760 *Anxa2*, (H) *Snai1*.  
761

762 **SUPPLEMENTAL DATA TABLES**

763

764 **Supplemental Table 1.** Key abbreviations used in this paper.

765 **Supplemental Table 2.** Corresponds to Fig. 1.

766 **Supplemental Table 3.** Corresponds to Fig. 2.

767 **Supplemental Table 4.** Corresponds to Fig. 3.

768 **Supplemental Table 5.** Corresponds to Fig. 4.

769 **Supplemental Table 6.** Corresponds to Fig. 5.

770 **Supplemental Table 7.** Corresponds to Fig. 6.

## 771 MATERIALS AND METHODS

### 772 Mouse models

773 Animal studies were performed in strict compliance with the UCSF Institutional Animal  
774 Care and Use Committee. Mice were housed in a standard 12 hour light/dark animal husbandry  
775 barrier facility at the Gladstone Institutes. The *Mesp1*<sup>Cre/+</sup> knock-in mice were obtained from  
776 Yumiko Saga (Ajima et al., 2021; Saga et al., 1999). *Rosa26R*<sup>Ai14</sup> mice were from Jackson  
777 Laboratory (strain #007914, (Madisen et al., 2010). *Tdgf1::LacZ* mice containing a transgene for  
778 *Tdgf1* enhancer with a LacZ reporter were obtained from Brian Black (Barnes et al., 2016).

779 Control embryos were generated from crosses of *Mesp1*<sup>Cre/+</sup>;*Rosa26R*<sup>Ai14</sup>;*Hipp11*<sup>Smarcd3-F6::eGFP</sup>-  
780 *F6::eGFP* males to C57BL/6J wildtype, *Mesp1*<sup>Cre/+</sup>, or *Mesp1*<sup>Cre/+</sup>;*Rosa26R*<sup>Ai14</sup>;*Hipp11*<sup>Smarcd3-F6::eGFP</sup>  
781 females. *Mesp1* KO embryos were generated from crosses of  
782 *Mesp1*<sup>Cre/+</sup>;*Rosa26R*<sup>Ai14</sup>;*Hipp11*<sup>Smarcd3-F6::eGFP</sup> males to *Mesp1*<sup>Cre/+</sup>, or  
783 *Mesp1*<sup>Cre/+</sup>;*Rosa26R*<sup>Ai14</sup>;*Hipp11*<sup>Smarcd3-F6::eGFP</sup> females. Transgenic embryos for single cell  
784 transcriptomic and epigenomic sequencing experiments were all on a C57BL/6J background.  
785 Transgenic embryos for whole mount *in situ* hybridizations and immunohistochemistry  
786 validations were on C57BL/6J backgrounds or a mixed CD1 / C57BL/6J background, in order to  
787 facilitate better littermate stage matching via larger litters, with litters born to *Mesp1*<sup>Cre/+</sup> CD1 /  
788 C57BL/6J hybrid females mated to *Mesp1*<sup>Cre/+</sup>;*Rosa26R*<sup>Ai14</sup>;*Hipp11*<sup>Smarcd3-F6::eGFP</sup> C57BL/6J  
789 males. “Control” denotes embryos with at least one wildtype allele in the *Mesp1* locus and  
790 includes genotypes *Mesp1*<sup>Cre/+</sup>;*Rosa26R*<sup>Ai14</sup>;*Hipp11*<sup>Smarcd3-F6::eGFP</sup>, *Mesp1*<sup>Cre/+</sup>;*Rosa26R*<sup>Ai14/+</sup>  
791 ;*Hipp11*<sup>Smarcd3-F6::eGFP/+</sup>, *Mesp1*<sup>+/+</sup>;*Rosa26R*<sup>Ai14</sup>;*Hipp11*<sup>Smarcd3-F6::eGFP</sup>, or *Mesp1*<sup>+/+</sup>;*Rosa26R*<sup>Ai14/+</sup>  
792 *Hipp11*<sup>Smarcd3-F6::eGFP/+</sup>. Heterozygosity of *Mesp1*<sup>Cre/+</sup> or *Mesp1*<sup>+/+</sup> is noted when control embryos  
793 were utilized in scRNA-seq (Fig. S1) or scATAC-seq (Fig. S10) library generation. “*Mesp1* KO”  
794 denotes embryos with homozygosity of the Cre insertion disrupting the *Mesp1* locus and  
795 includes genotypes *Mesp1*<sup>Cre/Cre</sup>;*Rosa26R*<sup>Ai14</sup>;*Hipp11*<sup>Smarcd3-F6::eGFP</sup> or  
796 *Mesp1*<sup>Cre/Cre</sup>;*Rosa26R*<sup>Ai14/+</sup>;*Hipp11*<sup>Smarcd3-F6::eGFP/+</sup>.

797 Control embryos for activity assessment of the *Tdgf1* enhancer had genotypes  
798 *Mesp1*<sup>Cre/+</sup>;*Tdgf1::LacZ* or *Tdgf1::LacZ*, and *Mesp1* KO embryos had genotypes  
799 *Mesp1*<sup>Cre/Cre</sup>;*Tdgf1::LacZ*.

800

### 801 Cloning and generation of TARGATT transgenic knock-in mice

802 The *Smarcd3-F6* fragment was isolated and cloned with inclusion of an *nlsEGFP* under  
803 control of an *Hsp68* minimal promoter for TARGATT (Applied Stem Cells) insertion to the



804 *Hipp11* locus as previously described (Devine et al., 2014) to create the *Hipp11<sup>Smarcd3-F6::eGFP</sup>*  
805 mouse. Purified construct DNA was injected into embryo pronuclei along with mRNA for the  
806 *Phi31o* transposase according to manufacturer's protocols.

807

808

### 809 **Timed matings and whole embryo dissections**

810 To achieve timed matings, male and female mice were housed together in the evening  
811 and pregnancy was assessed by vaginal plug the following morning. Gestational stage was  
812 determined starting as day E0.5 at noon of plug detection. Females were confirmed pregnant by  
813 abdominal ultrasound (Vevo 3100, Visual Sonics) the afternoon of day 6 or morning of day 7  
814 and sacrificed according to IACUC standard procedure at noon on day 7, or the early morning of  
815 day 8. The embryonic ages captured in individual litters ranged from E6.0 to E7.5 on day 7, and  
816 E7.5 to E7.75 on day 8. The diversity of ages in litters aided in the construction of a fine  
817 timecourse for both mutant and control timelines.

818 Embryos were dissected and in later stages when yolk is present, also de-yolked, in ice-  
819 cold PBS (Life Technologies, 14190250) with 1% FBS (Thermo Fisher Scientific, 10439016) on  
820 ice. Embryos were screened using an upright epifluorescent dissecting microscope (Leica  
821 MZFLIII microscope, Lumen Dynamics XCite 120LED light source, Leica DFC 3000G camera)  
822 for presence of both red and green fluorescent reporters, indicative of *Mesp1* lineage tracing  
823 from *Mesp1<sup>Cre</sup>;Rosa26<sup>R<sup>Ai14</sup></sup>* alleles and expression of the *Smarcd3-F6::eGFP* transgene reporter  
824 from the *Hipp11<sup>Smarcd3-F6::eGFP</sup>* allele, respectively. Embryos were staged according to (Downs &  
825 Davies, 1993). For difficult-to-capture control stages used in construction of the wildtype scRNA-  
826 seq timeline, absence of *Mesp1* lineage (*Ai14*) reporter was permitted and noted for those  
827 embryos (Fig. S1). Additionally, *Mesp1<sup>+/+</sup>* alleles were specifically included in addition to  
828 *Mesp1<sup>Cre/+</sup>* as controls for scATAC-seq library generation in the event locus-specific effects of  
829 Cre insertion required additional consideration, which we didn't find to be the case as both  
830 control genotypes appeared identically in the dataset (Fig. S10). DNA for genotyping was  
831 extracted using QuickExtract DNA Extraction Solution (Lucigen, QE09050) from harvested yolk  
832 sac tissue if available or else from a micro-dissected nick of the extraembryonic anterior  
833 proximal region. Genotyping was performed to distinguish *Mesp1* KO embryos from control  
834 embryos using Phire Green Hot Start II DNA Polymerase (Thermo Fisher Scientific, F124L)  
835 according to manufacturer's protocols using primers to detect wildtype bands (control, P1+P3)  
836 and Cre alleles (*Mesp1* KO, P1+P2):

837 *Mesp1* FWD, P1: GGC CAT AGG TGC CTG ACT TA

838 Cre2 REV, P2: CCT GTT TTG CAC GTT CAC GG

839 *Mesp1* REV, P3: ACC AGC GGG ACT CAG GAT

840

841

## 842 **Embryo preparation for single-cell library generation**

843 Due to the small size and lack of morphological distinction between tissue types of  
844 embryos at these early stages, whole embryos were dissected and harvested for single cell  
845 library generation.

846 Whole embryos were incubated in 200  $\mu$ L 0.25% TrypLE (ThermoFisher Scientific,  
847 12563029) solution for 5 min at 37°C and triturated gently. Dissociated cell suspension was  
848 quenched with 600  $\mu$ L of PBS with 1% FBS, singularized via passage through a 70  $\mu$ m cell  
849 strainer (BD Falcon, 352235), pelleted by centrifugation at 150xg for 3 min, and resuspended in  
850 34  $\mu$ L of PBS with 1% FBS. At least 2 embryos were collected per genotype per embryonic  
851 stage in all datasets except for the *Mesp1* KO embryos in the scRNA-seq dataset where this  
852 was not possible, and the use of relative developmental stages was employed in analysis along  
853 with replicate validations via *in-situ* hybridization for differentially expressed genes.

854

## 855 **Single-cell transcriptome library preparation and sequencing**

856 Libraries for scRNA-seq were prepared according to manufacturer's instructions using  
857 the 10X Genomics Chromium controller, Chromium Single Cell 5' Library and Gel Bead Kit v1  
858 (10X Genomics, 1000006) and Chromium Single Cell A Chip Kit (10X Genomics, 1000151). A  
859 maximum of 10,000 cells per sample were loaded onto the 10X Genomics Chromium  
860 instrument, and each sample was indexed with a unique sample identifier (10X Genomics  
861 Chromium i7 Multiplex Kit, 120262). Final libraries were pooled and sequenced shallowly  
862 according to 10X protocol parameters on a NextSeq500 (Illumina), and then re-pooled for  
863 deeper sequencing on HighSeq4000 (Illumina) and/or NovaSeq using an S4 lane (Illumina).  
864 Littermate, stage-matched comparisons of control and *Mesp1* KO libraries were always  
865 sequenced together in the same library pool. All scRNA-seq libraries were sequenced to a  
866 mean read depth of at least 50,000 total aligned reads per cell.

867

## 868 **Processing raw scRNA-seq**

869 Raw sequencing reads were processed using the 10X Genomics Cellranger v3.0.2  
870 pipeline. Reads were demultiplexed using cellranger mkfastq and aligned with cellranger count  
871 to the Mm10 reference genome containing additional sequences for the Ai14 and eGFP.  
872 Cellranger “aggr” was used to aggregate and read depth normalize multiple GEM libraries for  
873 either the wildtype atlas dataset or the atlas dataset containing control and *Mesp1* KO embryo  
874 libraries.

875

### 876 **Seurat analysis of scRNA-seq data**

877 Outputs from the Cellranger pipeline were analyzed using the Seurat Package v3.0.2 in  
878 R (Butler et al., 2018; Stuart et al., 2019; Satija et al., 2015). The dataset containing all wildtype  
879 embryos and the “WTvsMut” dataset containing control (wildtype) and *Mesp1* KO embryos were  
880 analyzed as separate Seurat objects. A single aggregated counts matrix for each separate  
881 dataset were used as inputs for Read10X and CreateSeuratObject functions. Quality control  
882 steps were performed to remove dead cells or doublets.

883

#### 884 *Wildtype Atlas*

885 For the wildtype atlas, cells with <10% mitochondrial reads, UMI counts less than  
886 50,000, and detected genes between 200 and 6,300 were retained. SCTransform (Hafemeister  
887 & Satija, 2019) was used to normalize and scale data with regressions performed with respect  
888 to mitochondrial percent, number of genes, and number of UMI counts detected. PCA analysis  
889 and batch correction were performed using FastMNN (Haghverdi et al., 2018) split by  
890 experimental group (experiment number denoted with library prefixes ALK06, ALK08, ALK07,  
891 ALK05, ALK04). 94,824 cells were clustered based on the top 50 principal components and  
892 visualized using RunUMAP, FindNeighbors, and FindClusters and outputs were visualized as  
893 Uniform Manifold Approximation and Projection (UMAP) embeddings generated with DimPlot.  
894 Cell types were annotated at clustering resolution 0.4 using the FindAllMarkers function with  
895 Wilcoxon rank-sum test (min.pct = 0.1, logfc threshold = 0.25) to identify cluster specific marker  
896 genes. Relevant mesoderm cell types were subsetted based on cluster-wise detection of  
897 *Smarcd3-F6::eGFP* and Ai14 transgenes for CPCs and the *Mesp1* lineage, respectively. The  
898 resulting 34,724 were re-clustered and re-annotated at resolution 1.2 to create the cardiac  
899 mesoderm wildtype atlas.

900

#### 901 *Whole Embryo Control vs. Mesp1 KO Atlas*

902 For the WTvsMut atlas, cells with <10% mitochondrial reads, UMI counts less than  
903 50,000, and detected genes between 200 and 7,000 were retained. SCTransform was used to  
904 normalize and scale data with regressions performed with respect to mitochondrial percent,  
905 number of genes, and number of UMI counts detected. PCA analysis and batch correction were  
906 performed using FastMNN split by experimental group as in wildtype dataset. Cells were  
907 clustered as described for wildtype atlas above, with iterative clustering performed following  
908 removal of low quality clusters. This WTvsMut dataset represents 96,027 cells containing  
909 79,725 control and 16,302 *Mesp1* KO cells. Cluster cell types were annotated at resolution 1.0  
910 using FindAllMarkers as described above.

911 The relevant developmental stages were annotated within Seurat meta data. Cells from  
912 6 embryos staged E6.0 - E6.5 (ALK06\_2\_E60\_con\_rep1, ALK06\_4\_E60\_con\_rep2,  
913 ALK08\_20\_E60\_con\_rep3, ALK08\_14\_lateE60\_con\_rep1, ALK07\_15\_E65\_con\_rep1,  
914 ALK08\_6\_E65\_Mesp1KO\_rep1) were denoted as “Early” stages. Cells from 4 embryos staged  
915 late E6.5 – early E7.5 (ALK07\_3\_lateE65\_con\_rep1, ALK07\_14\_E70\_con\_rep1,  
916 ALK08\_11\_E70\_Mesp1KO\_rep1, ALK07\_7\_earlyE75\_con\_rep1) were denoted as “Middle”  
917 stages. Cells from 5 embryos staged late E7.5 to early E7.75 when cardiac crescent is formed  
918 (ALK07\_6\_lateE75\_con\_rep1, ALK04\_3\_lateE75\_con\_rep2, ALK05\_7\_E775\_con\_rep1,  
919 ALK05\_2\_lateE75\_Mesp1KO\_rep1, ALK07\_8\_E775\_con\_rep2) were denoted as “Late” stages.  
920 While we set out to acquire replicates of both genotypes per each stage as the most optimal  
921 statistical scenario, the 25% yield of *Mesp1* KO embryos within C57BL/6J litter sizes at these  
922 early gastrulation stages proved prohibitive. Thus we relied on validations of key scRNA-seq  
923 findings via the orthogonal approach of multiplexed whole mount *in situ* hybridizations.

#### 924 925 *Smarcd3-F6+ Control vs Mesp1 KO Atlas*

926 To analyze putative CPCs, all cells expressing the *Smarcd3-F6-eGFP* transgene were  
927 subsetted from the full WTvsMut atlas and re-clustered into their own Seurat object containing  
928 4,868 cells (4,276 control and 592 *Mesp1* KO cells). FindAllMarkers function was used to  
929 identify cluster marker genes of represented cell types at resolution 1.7. The analysis between  
930 control and *Mesp1* KO genotypes irrespective of cell type was performed using FindMarkers  
931 function between genotypes with Wilcoxon rank-sum test (min.pct = 0.1, logfc threshold = 0.25).  
932 Cluster-wise differential gene expression testing was performed using FindMarkers function and  
933 Wilcoxon rank-sum test (min.pct = 0.1, logfc threshold = 0.25) between genotypes within  
934 specific cell type clusters, and visualized with the VlnPlot function. Differential gene expression

935 results irrespective of cell type were visualized by DotPlot function separated by genotypes and  
936 also genotypes separated by developmental stages.

937

#### 938 *Mesoderm Control vs Mesp1 KO Atlas*

939 Relevant mesoderm cells were subsetted from the full WTvsMut atlas based on cluster-  
940 wise detection via FeaturePlot and VlnPlot at cluster resolution 1.0 of *Smarcd3-F6::eGFP* and  
941 *Ai14* transgenes for CPCs and the *Mesp1* lineage, respectively. The resulting 35,792 cells  
942 (29,924 control and 5,868 *Mesp1* KO cells) of the WTvsMut mesoderm dataset was re-clustered  
943 and annotated at resolution 1.5 using FindAllMarkers function as above to identify cell type  
944 marker genes as described above.

945 Embryos representing the relative developmental stages of “Early” (5,504 cells; 4,472  
946 control and 1,032 *Mesp1* KO), “Middle” (7,666 cells; 6,734 control and 932 *Mesp1* KO), and  
947 “Late” (22,622 cells; 18,718 control and 3,904 *Mesp1* KO) as described above were subsetted  
948 into respective individual Seurat objects, re-clustered as described, and cell type clusters were  
949 further re-annotated (at resolutions 0.7, 0.7, 0.7 for Early, Middle, and Late objects,  
950 respectively). Clusters representing cell types relevant for cardiac development were identified  
951 through cluster-wise enrichment of *Smarcd3-F6::eGFP* transgene expression overlaid in  
952 UMAP space via FeaturePlot. Differential gene expression testing between genotypes within  
953 cardiogenic cell type clusters was performed using FindMarkers function with Wilcoxon rank-  
954 sum test (min.pct = 0.1, logfc threshold = 0.25). Differentially expressed genes with adjusted p-  
955 values < 0.05 were plotted as violin plots in Seurat except in cases to highlight total absence of  
956 transcript in one genotype condition.

957

#### 958 *Whole Embryo Control vs Mesp1 KO Atlas for scATAC-seq integration*

959 For the scRNA-seq WTvsMut atlas for integration with scATAC-seq data, libraries from  
960 Middle stage embryos (ALK07\_3\_lateE65\_con\_rep1, ALK07\_14\_E70\_con\_rep1,  
961 ALK08\_11\_E70\_Mesp1KO\_rep1, ALK07\_7\_earlyE75\_con\_rep1) and Late stage embryos  
962 (ALK07\_6\_lateE75\_con\_rep1, ALK04\_3\_lateE75\_con\_rep2, ALK05\_7\_E775\_con\_rep1,  
963 ALK05\_2\_lateE75\_Mesp1KO\_rep1, ALK07\_8\_E775\_con\_rep2) were subsetted from the  
964 aggregated WTvsMut counts matrix. Cells with <7.5% mitochondrial reads, UMI counts less  
965 than 50,000, and detected genes between 200 and 7,000 were retained. SCTransform was  
966 used to normalize and scale data with regressions performed with respect to mitochondrial  
967 percent, number of genes, and number of UMI counts detected. PCA analysis and batch

968 correction were performed using FastMNN split by experimental group. After initial clustering as  
969 previously described, cell clusters representing low quality cells were removed and clustering  
970 was iterated again. The resulting dataset represents 82,536 cells containing 68,717 control and  
971 13,819 *Mesp1* KO cells. Cluster cell types were annotated at resolution 1.2 using  
972 FindAllMarkers as described above.

973

974

### 975 *Mesoderm Control vs Mesp1 KO Atlas for scATAC-seq integration*

976 Relevant mesoderm cells were subsetted from the whole embryo matched scATAC-seq  
977 WTVsMut atlas based on cluster-wise detection via FeaturePlot and VlnPlot of *Smarcd3*-  
978 F6::eGFP and Ai14 transgenes for CPCs and the *Mesp1* lineage, respectively. The resulting  
979 30,427 cells (26,054 control and 4,373 *Mesp1* KO cells) of the scATAC-seq matched mesoderm  
980 WTVsMut dataset were re-processed from RNA assay slot with the standard Seurat workflow  
981 NormalizeData, FindVariableFeatures and ScaleData. SCTransform was not used in this  
982 mesoderm scRNA-seq dataset because we found that while cell type label-transfer with  
983 scATACseq was successful as previously described for the whole embryo integration,  
984 downstream scATAC-seq analyses leveraging the scRNA-seq gene integration matrix  
985 performed in the mesoderm scATAC-seq dataset were incompatible with SCT-normalized  
986 values. PCA analysis and batch correction were performed using FastMNN split by  
987 experimental group. From here clustering was performed as previously described and cell types  
988 were annotated at resolution 1.2 using FindAllMarkers function as above to identify cell type  
989 marker genes as described above.

990 Differential gene expression testing between genotypes within cell type clusters and  
991 between cell type clusters was performed using FindMarkers function with Wilcoxon rank-sum  
992 test (min.pct = 0.1, logfc threshold = 0.25). These lists of differentially expressed genes served  
993 as inputs to the (peak, gene) association analyses with scATAC-seq differential peaks using  
994 rGreat (below in methods).

995

### 996 **Single cell transcriptomic cell trajectories and pseudotime analysis**

997 Pseudotime analysis was performed using the URD package (version 1.0.2 and 1.1.1)  
998 (Farrell et al., 2018). The WTVsMut mesoderm Seurat object containing all three relative  
999 developmental stages, processed as previously described, was converted to an URD object  
1000 using the seuratToURD function. Cell-to-cell transition probabilities were constructed by setting



1001 the number of near neighbors (knn) to 189 and sigma to 10. Pseudotime was then calculated by  
1002 running 80 flood simulations with *Pou5f1*+ epiblast cells containing “Early” staged embryos  
1003 (cluster 1 of WTVsMut mesoderm Seurat object at resolution 1.5) as the “root” cells. Clusters  
1004 containing the most defined mesodermal derivative cell types and containing the “Late” staged  
1005 embryos were set as the “tip” cells (C15-,C16-HPCs, C11-, C7-Endothelial, C20-CFMeso, C2-  
1006 Allantois, C12-CMs, C29-CardiacMeso, C0-postLPM, C22, C26-LPM, C14-PrSoM-like, C4-  
1007 postPrxM1,C18-Meso). The resulting URD tree was subsequently built by simulated random  
1008 walks from each tip. Overlay of relative developmental stages from embryo data was used to  
1009 show consensus in pseudotime estimations of cell trajectories. Overlay of *Smarcd3*-F6::eGFP  
1010 and various cardiac marker genes such as *Nkx2-5*, *Myl7*, *Smarcd3*, *Tnnt2*, and various *Gata*  
1011 transcription factors were used to identify the relevant cardiac-fated branching segments of the  
1012 URD tree.

1013 To identify differentially expressed genes in fate-related cells of the cardiac branches,  
1014 cell barcodes from relevant branch segments were extracted from the URD object and assigned  
1015 their relevant segment branch identities in the corresponding Seurat object. Differential gene  
1016 testing using the Wilcoxon rank sum test (min.pct = 0.1, logfc threshold = 0.25) was then  
1017 performed between genotypes within a segment or between noted segments related in their  
1018 pseudotemporal progression. Differentially expressed genes with adjusted p-values less than  
1019 0.05 were plotted as violin plots in Seurat and representative genes were overlaid on the URD  
1020 tree to visualize expression patterns in pseudotime space.

1021

### 1022 **Single cell Assay for Transposase Accessible Chromatin (scATAC-seq) library** 1023 **generation**

1024 For scATACseq library generation we used the 10X Genomics Chromium, scATACseq  
1025 library kit v1 (10X Genomics, 1000110) and Chromium Chip E (10X Genomics, 1000156)  
1026 according to manufacturer’s protocols. Embryos were dissected and dissociated into single cells  
1027 as described above and cells were resuspended in pre-chilled Lysis buffer for isolation of single  
1028 nuclei. A maximum of 10,000 nuclei per sample were subjected to transposition and loaded into  
1029 the 10X Genomics Chromium instrument. Final libraries were pooled and sequenced shallowly  
1030 according to 10X protocol parameters on a NextSeq500 (Illumina). Littermate, stage-matched  
1031 comparisons comprising a total of 5 control and 4 *Mesp1* KO embryos were ultimately re-pooled  
1032 and sequenced together for deep sequencing on a NovaSeq6000 S4 lane (Illumina). All libraries

1033 were sequenced to depths of at least 24,000 median fragments per cell, and at most 35,000  
1034 median fragments per cell.

1035

### 1036 **Processing raw scATAC-seq**

1037 Raw sequencing reads were processed using the 10X Cellranger ATAC v1.2.0 software  
1038 pipeline. Reads were demultiplexed using cellranger-atac mkfastq. Cell barcodes were filtered  
1039 and aligned to the Mm10 reference genome using cellranger-atac count. The resulting output  
1040 indexed fragment files from each library were not aggregated and served as the inputs for  
1041 downstream computational analysis in ArchR (Granja et al., 2021).

1042

### 1043 **ArchR analysis of scATAC-seq**

1044 Downstream computational analysis of scATAC-seq data was done with the ArchR  
1045 software package v1.0.1 in R (Granja et al., 2021). Initial Arrow files were generated for all  
1046 samples from inputs of respective indexed fragment files and sample meta-data. Samples from  
1047 embryos aged E7.5 were called “Middle” stage (libraries ALK10\_5\_E75\_con\_rep1,  
1048 ALK10\_3\_E75\_con\_rep2, ALK10\_1\_lateE75\_con\_rep1, ALK10\_7\_E75\_Mesp1KO\_rep1,  
1049 ALK10\_2\_E75\_Mesp1KO\_rep2). Samples from embryos aged E7.75 were called “Late” stage  
1050 (libraries ALK09\_3\_E775\_con\_rep1, ALK09\_2\_E775\_con\_rep2,  
1051 ALK09\_1\_E775\_Mesp1KO\_rep1, ALK10\_6\_E775\_Mesp1KO\_rep2). The function  
1052 createArrowFiles was run on each sample, removing cells with a transcription start site (TSS)  
1053 enrichment score less than 4, and fragments less than 5000. This initialization also creates a  
1054 genome-wide TileMatrix of 500 base pair bins and a weighted calculation of accessibility within  
1055 and surrounding gene loci annotated from the Mm10 genome, called a GeneScoreMatrix. While  
1056 CellRanger v1.2.0 implements removal of multi-cell capture, ArchR recommends an additional  
1057 round of cell doublet removal using functions addDoubletScores and filterDoublets. Individual  
1058 ArrowFiles for each sample were aggregated into a single WTvsMut whole embryo  
1059 ArchRProject containing 46,819 cells (26,295 control, 20,524 *Mesp1* KO) with a median TSS  
1060 enrichment score of 10.675 and median of 30,703 fragments per cell. Dimensionality reduction  
1061 was performed with addIterativeLSI (2 iterations, resolution 0.2, 30 dimensions). Clustering was  
1062 performed using addClusters with “Seurat” method (resolution 0.8) and addUMAP was used to  
1063 embed values for dimensionality reduced visualizations with the function plotEmbedding.  
1064 Relative cell-type annotation of clusters was performed with consideration of combined



1065 information from GeneScore plots and label transfer from the complementary annotated whole  
1066 embryo WTvsMut scRNA-seq Seurat analysis object of stage-matched control and *Mesp1* KO  
1067 embryos for the relative Middle (embryos ALK07\_3\_lateE65\_con\_rep1,  
1068 ALK07\_14\_E70\_con\_rep1, ALK08\_11\_E70\_Mesp1KO\_rep1, ALK07\_7\_earlyE75\_con\_rep1)  
1069 and Late (embryos ALK07\_6\_lateE75\_con\_rep1, ALK04\_3\_lateE75\_con\_rep2,  
1070 ALK05\_7\_E775\_con\_rep1, ALK05\_2\_lateE75\_Mesp1KO\_rep1, ALK07\_8\_E775\_con\_rep2)  
1071 stages. For scRNA-seq integration, the addGeneIntegrationMatrix function utilizes Seurat's  
1072 FindTransferAnchors to perform Canonical Correlation Analysis. Relevant mesoderm clusters  
1073 ("C15", "C9", "C24", "C17", "C16", "C18", "C12", "C11", "C8") were identified based on relative  
1074 overlay of scRNA-seq cell type labels onto scATAC-seq clusters and GeneScoreMatrix for key  
1075 marker genes, and subsetted into a WTvsMut mesoderm ArchRProject containing 25,848 cells  
1076 (14,212 control and 11,636 *Mesp1* KO).

1077        Dimensionality reduction was performed on the subsetted WTvsMut mesoderm  
1078 ArchRProject with addIterativeLSI (4 iterations, resolution 0.2, 30 dimensions), which was then  
1079 batch corrected using addHarmony. Harmonized clustering was then performed using  
1080 addClusters with "Seurat" method (resolution 0.8) and addUMAP was performed. Clusters were  
1081 visualized using plotEmbedding. Relative cell-type annotation of clusters was again performed  
1082 following integration with the mesoderm WTvsMut complementary, annotated, Seurat analysis  
1083 scRNA-seq object from stage-matched control and *Mesp1* KO embryos for the relative Middle  
1084 and Late stages. The addGeneIntegrationMatrix function was used to generate GeneIntegration  
1085 plots, which were compared to GeneScore plots for understanding of cluster markers. A Jaccard  
1086 Similarity Analysis from the predicted scRNA-seq integration for scATAC-seq clusters  
1087 annotation was performed similarly to as described (Sarropoulos et al., 2021) to assess the  
1088 strength of predictive labels, and the resulting proportions were visualized with the pheatmap  
1089 function from the ComplexHeatmap R package (Gu, Eils & Schlesner, 2016). Cluster identities  
1090 from the mesoderm subset scATAC-seq dimensionality reduction were utilized for downstream  
1091 cluster-wise analyses.

1092

### 1093 *Peak calling and motif enrichment*

1094        Peaks were called using pseudo-bulkification and MACS2. Cell replicates for  
1095 pseudobulks were created using addGroupCoverages on scATAC-seq clusters (40 minimum  
1096 and 500 maximum cells in a replicate, minimum 2 replicates per cluster, 0.8 sampling ratio,  
1097 kmerlength for Tn5 bias correction of 6). Peaks were called using addReproduciblePeakSet

1098 (500 peaks per cell, 1.5E5 maximum peaks per cluster) with MACS2 (-75 base pair shift per Tn5  
1099 insertion, 150 basepair extension after shift, excluding mitochondrial chromosome genes and  
1100 chromosome Y genes, with a q-value significance cutoff 0.1). Peaks were then merged using  
1101 ArchR's iterative overlap method. Cluster enriched marker peaks were identified with  
1102 getMarkerFeatures (FDR <= 0.05, Log2FC >=1) and visualized with plotMarkerHeatmap.  
1103 Cluster motif enrichment was ascertained with addMotifAnnotations using the CIS-BP database  
1104 motif set. Cluster enriched motifs were visualized with peakAnnoEnrichment (FDR <=0.05,  
1105 Log2FC >=1) and then the top 7 motifs per cluster were plotted with plotEnrichHeatmap and  
1106 ComplexHeatmap. Single cell resolution motif enrichment was computed using the chromVAR  
1107 package (Schep et al., 2017) by adding background peaks (addBgdPeaks) and then motif z-  
1108 score deviations were computed per cell with addDeviationsMatrix. Motif enrichments were  
1109 visualized in UMAP embeddings with plotEmbedding.

1110

#### 1111 *Pseudotime ordering of cardiogenic trajectory*

1112 A pseudotime trajectory approximating the differentiation of progenitor cell types to  
1113 mature cell types was curated using the addTrajectory function (preFilterQuantile = 0.9,  
1114 postFilterQuantile = 0.9) to order cells along the trajectory backbone C6, C5, C12, C13, C7, C8,  
1115 C14. This backbone represents the biologically relevant cardiogenic differentiation path;  
1116 epiblast, EomesME, Mesp1ME, LPM2, LPM1, CMs/CPs. We leveraged ArchR's series of  
1117 pseudotime vector calculations to fit and align individual cells based on their Euclidean  
1118 distances to the defined backbone's cell type clusters' mean coordinates in order to fit a  
1119 continuous trajectory path in batch corrected LSI dimensional space. This resulting path with  
1120 scaled, per-cell pseudotime values was then visualized in UMAP space using the plotTrajectory  
1121 function. We then performed an integrative analysis to identify positive TF regulators along  
1122 trajectory pseudotime. We integrated gene accessibility scores and gene expression data with  
1123 motif accessibility across pseudotime using correlateTrajectories function and visualized  
1124 correlated matrices in trajectory space with plotTrajectoryHeatmap function.

1125

#### 1126 *Assessment of positive transcription factor regulators*

1127 A putative positive regulator represents a TF whose gene expression is positively  
1128 correlated to changes in accessibility of its corresponding motifs. Using the previously  
1129 calculated motif z-score deviations, we stratified motif z-scores variation between all clusters to  
1130 identify the maximum motif z-score delta. We next used the correlateMatrices function to

1131 correlate motifs to gene expression in batch-corrected LSI dimensional space, then used these  
1132 correlations to identify motifs with maximized deviance from expected accessibility averages in  
1133 other cells, and ranked TFs accordingly. We required positive TF regulators to have correlations  
1134 greater than 0.5 (and adjusted p value < 0.01) between their gene expression and  
1135 corresponding motifs, and deviation z-scores with maximum inter-cluster variation difference in  
1136 the top quartile (quantile 0.75). Correlations were plotted for visualization using the ggplot  
1137 function. While the ranking association with analysis might be vulnerable to generating false-  
1138 negatives, wherein potential TF drivers aren't recognized, we found overlay of motifs with TF  
1139 gene expression and gene score values along the cardiogenic trajectory and in UMAP cluster  
1140 space served to sufficiently identify the highest confidence drivers.

1141

#### 1142 *Differential peaks and differential motif enrichment comparisons between cell types*

1143 Pairwise comparisons between cell types of accessible peak differences was performed  
1144 using the getMarkerFeatures function (Wilcoxon test, TSS enrichment and log<sub>10</sub>(nFrag) bias,  
1145 100 nearby cells for biased-matched background, 0.8 buffer ratio, 500 maximum cells) by  
1146 setting one cell type as the lead comparison (useGroup) and one cell type as the relative  
1147 comparison (bgdGroup). These pairwise comparisons of differential peaks were saved as .RDS  
1148 objects and served as inputs to the (peak, gene) association analyses with rGreat (below in  
1149 Methods). Differentially enriched peaks (FDR ≤ 0.05, abs(Log<sub>2</sub>FC) ≥ 1) were visualized as  
1150 MA plots. Motif enrichment of differential peaks was determined using the peakAnnoEnrichment  
1151 function (FDR ≤ 0.05 and Log<sub>2</sub>FC ≥ 1 for useGroup enrichment or else Log<sub>2</sub>FC ≤ -1 for  
1152 bgdGroup enrichment) to determine motifs enriched in differential peaks between cell type  
1153 groups. Enriched motifs were rank-sorted and colored by significance of enrichment, then  
1154 plotted using the ggplot function.

1155

#### 1156 *Assessment of peak-to-gene linkages*

1157 Peak-to-gene linkage analysis to assess correlations between chromatin accessibility  
1158 and gene expression was performed using the addPeak2GeneLinks function on batch corrected  
1159 LSI dimensions (correlation cut off > 0.45, FDR < 1E-4, resolution 1000 bp for optimized  
1160 browser track visualization). Peak-to-gene linkages for differentially expressed genes (identified  
1161 in scRNA-seq analyses) were visualized with cell type cluster browser tracks using  
1162 plotBrowserTrack.

1163

1164 **Association between scATAC-seq differential peaks and scRNA-seq differentially**  
1165 **expressed genes**

1166 The rGREAT1(v1.26.0) bioconductor R package (Gu, 2022) was used to generate gene  
1167 lists linked to scATAC-seq differential peaks based on gene regulatory domains defined as 5 kb  
1168 upstream, 1 kb downstream of the Transcription Start Site (TSS) and up to 100 kb to the  
1169 nearest gene. The log Fold Change (logFC) for the (peak, gene) pairs where the peak was  
1170 differentially accessible (FDR  $\leq$  0.05, Log<sub>2</sub>FC  $\geq$  1) were plotted to show how the log fold  
1171 change of the gene expression is associated with the log fold change of the accessibility of  
1172 peaks. The (peak, gene) pairs in the top-right quadrant (Q3) of the plot correspond to  
1173 differentially open peaks linked with genes whose expressions are up-regulated. Similarly, the  
1174 (peak, gene) pairs in the bottom-left quadrant (Q1) correspond to differentially closed peaks  
1175 linked with genes whose expressions are down-regulated. Fisher's test (Pearce, 1992) was  
1176 performed on the counts of (peak, gene) pairs in each of the four quadrants; up-regulated  
1177 genes:differentially open peak regions, down-regulated genes:differentially closed peak regions,  
1178 up-regulated genes:differentially closed peak regions and down-regulated genes:differentially  
1179 open peak regions. This provided an estimate of the ratio of the odds of upregulated genes  
1180 linked to differentially open peak regions versus the odds of up-regulated genes linked to  
1181 differentially closed peak regions.

1182

1183 **Whole mount fluorescent *in situ* hybridization experiments**

1184 Validation of spatial gene expression and differentially expressed genes was conducted  
1185 in stage-matched, littermate whole-mount embryos. The assay for whole-mount embryo *in situ*  
1186 was adapted from the optimized whole-mount zebrafish embryo protocol using the RNAscope  
1187 Multiplex Fluorescent Reagent Kit v2 and ProteasePlus (ACDBio) for embryo permeabilization  
1188 as previously described (Gross-Thebing, Paksa & Raz, 2014; Soysa et al., 2019). De-yolked  
1189 whole embryos were fixed in 4% paraformaldehyde solution (Electron Microscopy Sciences  
1190 15710) overnight at 4°C. Embryos were then washed 2x in PBST and processed through 10 min  
1191 incubations in a dehydration series of 25%, 50%, 75%, 100% methanol on ice. Embryos were  
1192 stored in 100% methanol at -20°C short term until initiation of the *in situ* hybridization protocol.  
1193 Yolk sac DNA or anterior proximal extraembryonic regions prior to fixation were used for  
1194 genotyping. Catalogue numbers for ACDBio RNAscope probes used in this study: eGFP  
1195 (400281-C1, -C2, -C4), Tdgf1 (506411-C1), Fgf8 (313411-C1), Eomes (429641-C2), Myl7  
1196 (584271-C3), Anxa2 (501011-C2), Nkx2-5 (428241-C2). Whole-mount embryos were imaged in

1197 cold PBS using an upright epifluorescent microscope (Leica MZFLIII, Leica DFC 3000G, Lumen  
1198 Dynamics XCite 120LED) and acquisition software LASX (Leica). Control and *Mesp1* KO  
1199 embryo comparisons were imaged and processed with identical parameters.

1200

### 1201 **Whole-mount embryo X-gal staining and imaging**

1202 X-gal staining for LacZ enhancer activity was performed according to standard protocols  
1203 (Anderson et al., 2004; Materna et al., 2018; Sinha et al., 2015; Wilkinson & Nieto, 1993).

1204 Briefly, embryos were fixed in 4% paraformaldehyde at 4°C and stored in PBS until initiation of  
1205 standard X-gal staining protocol. Littermate embryos were processed and imaged identically  
1206 and simultaneously in brightfield using a Leica MZ165 FC stereomicroscope with DFC450  
1207 camera. Genotyping was done following blind processing.

1208

### 1209 **Whole-mount embryo immunostaining and light sheet imaging**

1210 Dissected embryos were fixed in 4% paraformaldehyde for 1 hour at room temperature  
1211 with gentle agitation, washed in PBS, and stored in PBS + 0.2% sodium azide short-term at 4°C  
1212 until initiation of immunostaining. Immunostaining was performed in PCR strip tubes. Embryos  
1213 were incubated in blocking solution; PBS + 5% normal donkey serum, 0.2% sodium azide, 0.5%  
1214 Triton X-100 (Sigma, X100-500 mL) with 100 µg/mL unconjugated Fab fragment donkey anti-  
1215 mouse (Jackson Immunoresearch, 715-007-003) for 2 hours at 37°C with gentle rocking  
1216 agitation. Following PBS washes, primary staining was done in blocking solution overnight and  
1217 subsequently washed with PBS. Secondary staining incubation was done  
1218 in blocking solution for 2-3 hours protected from light, and embryos were subjected to final PBS  
1219 washes. All steps of immunostaining protocol were done at 37°C with gentle rocking and  
1220 rotation. Antibodies used in this study: sheep polyclonal Foxc2 (R&D, AF6989), chicken  
1221 polyclonal GFP (Aves, GFP-1020), rabbit polyclonal Cre (Millipore, 69050). Light sheet embryo  
1222 images were acquired using Z1 Light Sheet Microscope (Zeiss) and processed as described  
1223 (Dominguez et al., 2022).

1224 **ACKNOWLEDGEMENTS**

1225 We thank members of the Bruneau Lab for thoughtful discussion, comments, and advice on the  
1226 study, Kathryn Claiborn for editorial assistance, Junli Zhang for TARGATT transgenic mouse  
1227 microinjections, M. Ryan Corces for advice on ArchR analysis, and Angelo Pelonero for general  
1228 bioinformatics advice. We thank the UCSF Center for Advanced Technology for sequencing,  
1229 and the Gladstone Institutes Bioinformatics, Genomics, and Microscopy and Histology cores for  
1230 technical advice and support.

1231 **COMPETING INTERESTS**

1232 B.G.B. and D.S. are founders, shareholders, and advisors of Tenaya Therapeutics. B.G.B. is an  
1233 advisor for SilverCreek Pharmaceuticals. The work presented here is not related to the interests  
1234 of these commercial entities.

1235

1236 **AUTHOR CONTRIBUTIONS**

1237 A.L.K. and B.G.B. conceived and designed the study, and interpreted the data. S.A.B.W.,  
1238 A.L.K., and S.S.R. performed embryo dissections. S.A.B.W. managed animal husbandry and  
1239 genotyping. S.A.B.W. and A.L.K. performed whole mount *in situ* hybridization experiments.  
1240 A.L.K. performed imaging and image processing of embryos used for sequencing library  
1241 preparations, and imaging and processing of *in situ* hybridization embryos. A.L.K. and S.S.R.  
1242 generated scRNA-seq and scATAC-seq libraries. A.L.K. performed scRNA-seq analyses. A.L.K.  
1243 and K.C. performed scATAC-seq analyses with input from S.S.R. and R.T. A.A. performed  
1244 peak, gene association analysis with input from R.T. W.P.D. generated the *Hipp11<sup>Smarcd3-F6::eGFP</sup>*  
1245 mouse and first observed the posterior *Smarcd3-F6* phenotype in *Mesp1* KO embryos. T.S.  
1246 generated, processed, and imaged *TdGF1* enhancer transgene embryos. M.H.D. generated  
1247 immunostaining and light sheet imaging embryo data. B.L.B. and D.S. supervised and advised.  
1248 A.L.K. prepared figures and wrote the manuscript with input from co-authors.

1249

1250 **FUNDING**

1251 This work was funded with grants from the National Heart, Lung, and Blood Institute (R01  
1252 HL114948 to B.G.B, the Bench to Bassinet Program UM1 HL098179, to B.G.B. and D.S, and  
1253 P01 HL146366 to B.G.B., D.S., and B.L.B.); The Roddenberry Foundation (B.G.B. and D.S.),  
1254 the L.K. Whittier Foundation (D.S.); Dario and Irina Sattui (D.S.); and The Younger Family Fund



1255 (B.G.B. and D.S.). A.L.K. was supported by fellowships from the National Science Foundation  
1256 Graduate Research Fellowship Program 2034836 and the American Heart  
1257 Association/Children's Heart Foundation predoctoral fellowship 817268. S.S.R. was supported  
1258 by the Winslow Family. M.H.D. was supported by National Institutes of Health T32 training  
1259 grants 2T32-HL007731-26 and T32-HL007843-24, as well as funding from UCSF Department of  
1260 Medicine, Division of Cardiology. This work was also supported by a National Institutes of  
1261 Health/National Center for Research Resources grant (C06 RR018928) to the J. David  
1262 Gladstone Institutes.

1263

#### 1264 **DATA AVAILABILITY**

1265 Raw and processed data for the whole embryo scRNA-seq and scATAC-seq datasets reported  
1266 in this paper are available through the Gene Expression Omnibus (GEO) with accession code  
1267 GSE210639. All analysis software is referenced in Methods section and is freely available from  
1268 respective developers. Analysis scripts used to generate figure panels are freely available from  
1269 the authors upon request.

1270 **REFERENCES**

1271

1272 Ajima, R., Sakakibara, Y., Sakurai-Yamatani, N., Muraoka, M. & Saga, Y. (2021) Formal proof  
1273 of the requirement of MESP1 and MESP2 in mesoderm specification and their  
1274 transcriptional control via specific enhancers in mice. *Development*. 148 (20).  
1275 doi:10.1242/dev.194613.

1276 Akerberg, B.N., Gu, F., VanDusen, N.J., Zhang, X., Dong, R., et al. (2019) A reference map of  
1277 murine cardiac transcription factor chromatin occupancy identifies dynamic and  
1278 conserved enhancers. *Nature Communications*. 10 (1), 4907. doi:10.1038/s41467-019-  
1279 12812-3.

1280 Alexanian, M., Maric, D., Jenkinson, S.P., Mina, M., Friedman, C.E., et al. (2017) A transcribed  
1281 enhancer dictates mesendoderm specification in pluripotency. *Nature Communications*. 8  
1282 (1), 1806. doi:10.1038/s41467-017-01804-w.

1283 Anderson, J.P., Dodou, E., Heidt, A.B., Val, S.J.D., Jaehnig, E.J., Greene, S.B., Olson, E.N. &  
1284 Black, B.L. (2004) HRC Is a Direct Transcriptional Target of MEF2 during Cardiac,  
1285 Skeletal, and Arterial Smooth Muscle Development In Vivo. *Molecular and Cellular*  
1286 *Biology*. 24 (9), 3757–3768. doi:10.1128/mcb.24.9.3757-3768.2004.

1287 Barnes, R.M., Harris, I.S., Jaehnig, E.J., Sauls, K., Sinha, T., Rojas, A., Schachterle, W.,  
1288 McCulley, D.J., Norris, R.A. & Black, B.L. (2016) MEF2C regulates outflow tract  
1289 alignment and transcriptional control of *Tdgfl*. *Development*. 143 (5), 774–779.  
1290 doi:10.1242/dev.126383.

1291 Bondue, A. & Blanpain, C. (2010) *Mesp1*. *Circulation Research*. 107 (12), 1414–1427.  
1292 doi:10.1161/circresaha.110.227058.

1293 Bondue, A., Lapouge, G., Paulissen, C., Semeraro, C., Iacovino, M., Kyba, M. & Blanpain, C.  
1294 (2008) *Mesp1* Acts as a Master Regulator of Multipotent Cardiovascular Progenitor  
1295 Specification. *Cell Stem Cell*. 3 (1), 69–84. doi:10.1016/j.stem.2008.06.009.

- 1296 Branney, P.A., Faas, L., Steane, S.E., Pownall, M.E. & Isaacs, H.V. (2009) Characterisation of  
1297 the Fibroblast Growth Factor Dependent Transcriptome in Early Development. *PLoS*  
1298 *ONE*. 4 (3), e4951. doi:10.1371/journal.pone.0004951.
- 1299 Brown, C.O., Chi, X., Garcia-Gras, E., Shirai, M., Feng, X.-H. & Schwartz, R.J. (2004) The  
1300 Cardiac Determination Factor, Nkx2-5, Is Activated by Mutual Cofactors GATA-4 and  
1301 Smad1/4 via a Novel Upstream Enhancer\*. *Journal of Biological Chemistry*. 279 (11),  
1302 10659–10669. doi:10.1074/jbc.m301648200.
- 1303 Bruneau, B.G. (2013) Signaling and Transcriptional Networks in Heart Development and  
1304 Regeneration. *Cold Spring Harbor Perspectives in Biology*. 5 (3), a008292.  
1305 doi:10.1101/cshperspect.a008292.
- 1306 Bruneau, B.G. (2008) The developmental genetics of congenital heart disease. *Nature*. 451  
1307 (7181), 943–948. doi:10.1038/nature06801.
- 1308 Buenrostro, J.D., Wu, B., Litzenburger, U.M., Ruff, D., Gonzales, M.L., Snyder, M.P., Chang,  
1309 H.Y. & Greenleaf, W.J. (2015) Single-cell chromatin accessibility reveals principles of  
1310 regulatory variation. *Nature*. 523 (7561), 486–490. doi:10.1038/nature14590.
- 1311 Butler, A., Hoffman, P., Smibert, P., Papalexi, E. & Satija, R. (2018) Integrating single-cell  
1312 transcriptomic data across different conditions, technologies, and species. *Nature*  
1313 *Biotechnology*. 36 (5), 411–420. doi:10.1038/nbt.4096.
- 1314 Cai, W., Zhou, W., Han, Z., Lei, J., Zhuang, J., Zhu, P., Wu, X. & Yuan, W. (2020) Master  
1315 regulator genes and their impact on major diseases. *PeerJ*. 8, e9952.  
1316 doi:10.7717/peerj.9952.
- 1317 Chen, Y. & Cao, X. (2009) NFAT directly regulates Nkx2-5 transcription during cardiac cell  
1318 differentiation. *Biology of the Cell*. 101 (6), 335–350. doi:10.1042/bc20080108.
- 1319 Cheng, P., Andersen, P., Hassel, D., Kaynak, B.L., Limphong, P., Juergensen, L., Kwon, C. &  
1320 Srivastava, D. (2013) Fibronectin mediates mesendodermal cell fate decisions.  
1321 *Development*. 140 (12), 2587–2596. doi:10.1242/dev.089052.

- 1322 Chiapparo, G., Lin, X., Lescroart, F., Chabab, S., Paulissen, C., Pitisci, L., Bondue, A. &  
1323 Blanpain, C. (2016) Mesp1 controls the speed, polarity, and directionality of  
1324 cardiovascular progenitor migration. *The Journal of Cell Biology*. 213 (4), 463–477.  
1325 doi:10.1083/jcb.201505082.
- 1326 Clark, C.D., Zhang, B., Lee, B., Evans, S.I., Lassar, A.B. & Lee, K.-H. (2013) Evolutionary  
1327 conservation of Nkx2.5 autoregulation in the second heart field. *Developmental Biology*.  
1328 374 (1), 198–209. doi:10.1016/j.ydbio.2012.11.007.
- 1329 Costello, I., Pimeisl, I.-M., Dräger, S., Bikoff, E.K., Robertson, E.J. & Arnold, S.J. (2011) The  
1330 T-box transcription factor Eomesodermin acts upstream of Mesp1 to specify cardiac  
1331 mesoderm during mouse gastrulation. *Nature Cell Biology*. 13 (9), 1084–1091.  
1332 doi:10.1038/ncb2304.
- 1333 Davis, T.L. & Rebay, I. (2017) Master regulators in development: Views from the *Drosophila*  
1334 retinal determination and mammalian pluripotency gene networks. *Developmental*  
1335 *Biology*. 421 (2), 93–107. doi:10.1016/j.ydbio.2016.12.005.
- 1336 Devine, W.P., Wythe, J.D., George, M., Koshiba-Takeuchi, K. & Bruneau, B.G. (2014) Early  
1337 patterning and specification of cardiac progenitors in gastrulating mesoderm. *eLife*. 3,  
1338 e03848. doi:10.7554/elife.03848.
- 1339 Dominguez, M.H., Krup, A.L., Muncie, J.M. & Bruneau, B.G. (2022) A spatiotemporal gradient  
1340 of mesoderm assembly governs cell fate and morphogenesis of the early mammalian  
1341 heart. *bioRxiv*. 2022.08.01.502159. doi:10.1101/2022.08.01.502159.
- 1342 Doppler, S.A., Werner, A., Barz, M., Lahm, H., Deutsch, M.-A., Dreßen, M., Schiemann, M.,  
1343 Voss, B., Gregoire, S., Kuppasamy, R., Wu, S.M., Lange, R. & Krane, M. (2014)  
1344 Myeloid Zinc Finger 1 (Mzf1) Differentially Modulates Murine Cardiogenesis by  
1345 Interacting with an Nkx2.5 Cardiac Enhancer. *PLoS ONE*. 9 (12), e113775.  
1346 doi:10.1371/journal.pone.0113775.

- 1347 Downs, K.M. & Davies, T. (1993) Staging of gastrulating mouse embryos by morphological  
1348 landmarks in the dissecting microscope. *Development*. 118 (4), 1255–1266.  
1349 doi:10.1242/dev.118.4.1255.
- 1350 Farrell, J.A., Wang, Y., Riesenfeld, S.J., Shekhar, K., Regev, A. & Schier, A.F. (2018) Single-  
1351 cell reconstruction of developmental trajectories during zebrafish embryogenesis.  
1352 *Science*. 360 (6392), eaar3131. doi:10.1126/science.aar3131.
- 1353 Fernandez-Guerrero, M., Zdral, S., Castilla-Ibeas, A., Lopez-Delisle, L., Duboule, D. & Ros,  
1354 M.A. (2021) Time-sequenced transcriptomes of developing distal mouse limb buds: A  
1355 comparative tissue layer analysis. *Developmental Dynamics*. doi:10.1002/dvdy.394.
- 1356 George, R.M. & Firulli, A.B. (2021) Deletion of a Hand1 lncRNA-Containing Septum  
1357 Transversum Enhancer Alters lncRNA Expression but Is Not Required for Hand1  
1358 Expression. *Journal of Cardiovascular Development and Disease*. 8 (5), 50.  
1359 doi:10.3390/jcdd8050050.
- 1360 Granja, J.M., Corces, M.R., Pierce, S.E., Bagdatli, S.T., Choudhry, H., Chang, H.Y. &  
1361 Greenleaf, W.J. (2021) ArchR is a scalable software package for integrative single-cell  
1362 chromatin accessibility analysis. *Nature Genetics*. 53 (3), 403–411. doi:10.1038/s41588-  
1363 021-00790-6.
- 1364 Gross-Thebing, T., Paksa, A. & Raz, E. (2014) Simultaneous high-resolution detection of  
1365 multiple transcripts combined with localization of proteins in whole-mount embryos.  
1366 *BMC Biology*. 12 (1), 55. doi:10.1186/s12915-014-0055-7.
- 1367 Gu, Z., Eils, R. & Schlesner, M. (2016) Complex heatmaps reveal patterns and correlations in  
1368 multidimensional genomic data. *Bioinformatics*. 32 (18), 2847–2849.  
1369 doi:10.1093/bioinformatics/btw313.
- 1370 Gu, Z., 2022. *rGreat: Client for GREAT Analysis*. <https://github.com/jokergoo/rGREAT>,  
1371 <http://great.stanford.edu/public/html/>  
1372

- 1373 Guo, X., Xu, Y., Wang, Z., Wu, Y., Chen, J., Wang, G., Lu, C., Jia, W., Xi, J., Zhu, S., Jiapaer,  
1374 Z., Wan, X., Liu, Z., Gao, S. & Kang, J. (2018) A Linc1405/Eomes Complex Promotes  
1375 Cardiac Mesoderm Specification and Cardiogenesis. *Cell Stem Cell*. 22 (6), 893-908.e6.  
1376 doi:10.1016/j.stem.2018.04.013.
- 1377 Hafemeister, C. & Satija, R. (2019) Normalization and variance stabilization of single-cell RNA-  
1378 seq data using regularized negative binomial regression. *Genome Biology*. 20 (1), 296.  
1379 doi:10.1186/s13059-019-1874-1.
- 1380 Haghverdi, L., Lun, A.T.L., Morgan, M.D. & Marioni, J.C. (2018) Batch effects in single-cell  
1381 RNA-sequencing data are corrected by matching mutual nearest neighbors. *Nature*  
1382 *Biotechnology*. 36 (5), 421–427. doi:10.1038/nbt.4091.
- 1383 Han, M.-Z., Xu, R., Xu, Y.-Y., Zhang, X., Ni, S.-L., Huang, B., Chen, A.-J., Wei, Y.-Z., Wang,  
1384 S., Li, W.-J., Zhang, Q., Li, G., Li, X.-G. & Wang, J. (2017) TAGLN2 is a candidate  
1385 prognostic biomarker promoting tumorigenesis in human gliomas. *Journal of*  
1386 *Experimental & Clinical Cancer Research*. 36 (1), 155. doi:10.1186/s13046-017-0619-9.
- 1387 Han, Z., Yu, Y., Cai, B., Xu, Z., Bao, Z., et al. (2020) YAP/TEAD3 signal mediates cardiac  
1388 lineage commitment of human-induced pluripotent stem cells. *Journal of Cellular*  
1389 *Physiology*. 235 (3), 2753–2760. doi:10.1002/jcp.29179.
- 1390 Haraguchi, S., Kitajima, S., Takagi, A., Takeda, H., Inoue, T. & Saga, Y. (2001) Transcriptional  
1391 regulation of *Mesp1* and *Mesp2* genes: differential usage of enhancers during  
1392 development. *Mechanisms of Development*. 108 (1–2), 59–69. doi:10.1016/s0925-  
1393 4773(01)00478-6.
- 1394 Harvey, R.P. (2002) Patterning the vertebrate heart. *Nature Reviews Genetics*. 3 (7), 544–556.  
1395 doi:10.1038/nrg843.
- 1396 Huang, G., Ma, L., Shen, L., Lei, Y., Guo, L., Deng, Y. & Ding, Y. (2022) MIF/SCL3A2  
1397 depletion inhibits the proliferation and metastasis of colorectal cancer cells via the



- 1398 AKT/GSK-3 $\beta$  pathway and cell iron death. *Journal of Cellular and Molecular Medicine*.  
1399 26 (12), 3410–3422. doi:10.1111/jcmm.17352.
- 1400 Katsanou, V., Milatos, S., Yiakouvaki, A., Sgantzis, N., Kotsoni, A., Alexiou, M., Harokopos,  
1401 V., Aidinis, V., Hemberger, M. & Kontoyiannis, D.L. (2009) The RNA-Binding Protein  
1402 Elavl1/HuR Is Essential for Placental Branching Morphogenesis and Embryonic  
1403 Development. *Molecular and Cellular Biology*. 29 (10), 2762–2776.  
1404 doi:10.1128/mcb.01393-08.
- 1405 Kelly, R.G. (2016) How Mesp1 makes a move. *The Journal of Cell Biology*. 213 (4), 411–413.  
1406 doi:10.1083/jcb.201604121.
- 1407 Kelly, R.G., Buckingham, M.E. & Moorman, A.F. (2014) Heart Fields and Cardiac  
1408 Morphogenesis. *Cold Spring Harbor Perspectives in Medicine*. 4 (10), a015750.  
1409 doi:10.1101/cshperspect.a015750.
- 1410 Kitajima, S., Takagi, A., Inoue, T. & Saga, Y. (2000) MesP1 and MesP2 are essential for the  
1411 development of cardiac mesoderm. *Development*. 127 (15), 3215–3226.  
1412 doi:10.1242/dev.127.15.3215.
- 1413 Klymiuk, I., Kenner, L., Adler, T., Busch, D.H., Boersma, A., Irmeler, M., Fridrich, B., Gailus-  
1414 Durner, V., Fuchs, H., Leitner, N., Müller, M., Kühn, R., Schleder, M., Treise, I.,  
1415 Angelis, M.H. de & Beckers, J. (2012) In Vivo Functional Requirement of the Mouse  
1416 Ifitm1 Gene for Germ Cell Development, Interferon Mediated Immune Response and  
1417 Somitogenesis. *PLoS ONE*. 7 (10), e44609. doi:10.1371/journal.pone.0044609.
- 1418 Kokkinopoulos, I., Ishida, H., Saba, R., Ruchaya, P., Cabrera, C., Struebig, M., Barnes, M.,  
1419 Terry, A., Kaneko, M., Shintani, Y., Coppen, S., Shiratori, H., Ameen, T., Mein, C.,  
1420 Hamada, H., Suzuki, K. & Yashiro, K. (2015) Single-Cell Expression Profiling Reveals a  
1421 Dynamic State of Cardiac Precursor Cells in the Early Mouse Embryo. *PLoS ONE*. 10  
1422 (10), e0140831. doi:10.1371/journal.pone.0140831.

- 1423 Lange, U., Saitou, M., Western, P., Barton, S. & Surani, M. (2003) The Fragilis interferon-  
1424 inducible gene family of transmembrane proteins is associated with germ cell  
1425 specification in mice. *BMC Developmental Biology*. 3 (1), 1–1. doi:10.1186/1471-213x-  
1426 3-1.
- 1427 Lescroart, F., Chabab, S., Lin, X., Rulands, S., Paulissen, C., Rodolosse, A., Auer, H., Achouri,  
1428 Y., Dubois, C., Bondue, A., Simons, B.D. & Blanpain, C. (2014) Early lineage restriction  
1429 in temporally distinct populations of Mesp1 progenitors during mammalian heart  
1430 development. *Nature Cell Biology*. 16 (9), 829–840. doi:10.1038/ncb3024.
- 1431 Lescroart, F., Wang, X., Lin, X., Swedlund, B., Gargouri, S., Sánchez-Dànes, A., Moignard, V.,  
1432 Dubois, C., Paulissen, C., Kinston, S., Göttgens, B. & Blanpain, C. (2018) Defining the  
1433 earliest step of cardiovascular lineage segregation by single-cell RNA-seq. *Science*. 359  
1434 (6380), eaao4174. doi:10.1126/science.aao4174.
- 1435 Liberatore, C.M., Searcy-Schrick, R.D., Vincent, E.B. & Yutzey, K.E. (2002) Nkx-2.5 Gene  
1436 Induction in Mice Is Mediated by a Smad Consensus Regulatory Region. *Developmental*  
1437 *Biology*. 244 (2), 243–256. doi:10.1006/dbio.2002.0604.
- 1438 Lien, C.-L., McAnally, J., Richardson, J.A. & Olson, E.N. (2002) Cardiac-Specific Activity of an  
1439 Nkx2–5 Enhancer Requires an Evolutionarily Conserved Smad Binding Site.  
1440 *Developmental Biology*. 244 (2), 257–266. doi:10.1006/dbio.2002.0603.
- 1441 Lien, C.L., Wu, C., Mercer, B., Webb, R., Richardson, J.A. & Olson, E.N. (1999) Control of  
1442 early cardiac-specific transcription of Nkx2-5 by a GATA-dependent enhancer.  
1443 *Development*. 126 (1), 75–84. doi:10.1242/dev.126.1.75.
- 1444 Lin, X., Swedlund, B., Ton, M.-L.N., Ghazanfar, S., Guibentif, C., Paulissen, C., Baudalet, E.,  
1445 Plaindoux, E., Achouri, Y., Calonne, E., Dubois, C., Mansfield, W., Zaffran, S., Marioni,  
1446 J.C., Fuks, F., Göttgens, B., Lescroart, F. & Blanpain, C. (2022) Mesp1 controls the  
1447 chromatin and enhancer landscapes essential for spatiotemporal patterning of early  
1448 cardiovascular progenitors. *Nature Cell Biology*. 24 (7), 1114–1128. doi:10.1038/s41556-  
1449 022-00947-3.

- 1450 Lindsley, R.C., Gill, J.G., Murphy, T.L., Langer, E.M., Cai, M., Mashayekhi, M., Wang, W.,  
1451 Niwa, N., Nerbonne, J.M., Kyba, M. & Murphy, K.M. (2008) *Mesp1* Coordinately  
1452 Regulates Cardiovascular Fate Restriction and Epithelial-Mesenchymal Transition in  
1453 Differentiating ESCs. *Cell Stem Cell*. 3 (1), 55–68. doi:10.1016/j.stem.2008.04.004.
- 1454 Liu, Y. (2017) Earlier and broader roles of *Mesp1* in cardiovascular development. *Cellular and*  
1455 *Molecular Life Sciences*. 74 (11), 1969–1983. doi:10.1007/s00018-016-2448-y.
- 1456 MacNeill, C., French, R., Evans, T., Wessels, A. & Burch, J.B.E. (2000) Modular Regulation of  
1457 *cGATA-5* Gene Expression in the Developing Heart and Gut. *Developmental Biology*.  
1458 217 (1), 62–76. doi:10.1006/dbio.1999.9539.
- 1459 Madisen, L., Zwingman, T.A., Sunkin, S.M., Oh, S.W., Zariwala, H.A., Gu, H., Ng, L.L.,  
1460 Palmiter, R.D., Hawrylycz, M.J., Jones, A.R., Lein, E.S. & Zeng, H. (2010) A robust and  
1461 high-throughput Cre reporting and characterization system for the whole mouse brain.  
1462 *Nature Neuroscience*. 13 (1), 133–140. doi:10.1038/nn.2467.
- 1463 Materna, S.C., Sinha, T., Barnes, R.M., Bueren, K.L. van & Black, B.L. (2018) Cardiovascular  
1464 development and survival require *Mef2c* function in the myocardial but not the  
1465 endothelial lineage. *Developmental Biology*. 445 (2), 170–177.  
1466 doi:10.1016/j.ydbio.2018.12.002.
- 1467 Meijer, H.A., Pavert, S.A.V.D., Stroband, H.W.J. & Boerjan, M.L. (2000) Expression of the  
1468 organizer specific homeobox gene *Goosecoid* (*gsc*) in porcine embryos. *Molecular*  
1469 *Reproduction and Development*. 55 (1), 1–7. doi:10.1002/(sici)1098-  
1470 2795(200001)55:1<1::aid-mrd1>3.0.co;2-a.
- 1471 Migeotte, I., Grego-Bessa, J. & Anderson, K.V. (2011) *Rac1* mediates morphogenetic responses  
1472 to intercellular signals in the gastrulating mouse embryo. *Development*. 138 (14), 3011–  
1473 3020. doi:10.1242/dev.059766.
- 1474 Molkenstin, J.D., Antos, C., Mercer, B., Taigen, T., Miano, J.M. & Olson, E.N. (2000) Direct  
1475 Activation of a *GATA6* Cardiac Enhancer by *Nkx2.5*: Evidence for a Reinforcing

- 1476           Regulatory Network of Nkx2.5 and GATA Transcription Factors in the Developing  
1477           Heart. *Developmental Biology*. 217 (2), 301–309. doi:10.1006/dbio.1999.9544.
- 1478   Moulik, M., Vatta, M., Witt, S.H., Arola, A.M., Murphy, R.T., McKenna, W.J., Boriek, A.M.,  
1479           Oka, K., Labeit, S., Bowles, N.E., Arimura, T., Kimura, A. & Towbin, J.A. (2009)  
1480           ANKRD1, the Gene Encoding Cardiac Ankyrin Repeat Protein, Is a Novel Dilated  
1481           Cardiomyopathy Gene. *Journal of the American College of Cardiology*. 54 (4), 325–333.  
1482           doi:10.1016/j.jacc.2009.02.076.
- 1483   Nees, S.N. & Chung, W.K. (2019) Genetic Basis of Human Congenital Heart Disease. *Cold  
1484           Spring Harbor Perspectives in Biology*. 12 (9), a036749.  
1485           doi:10.1101/cshperspect.a036749.
- 1486   Pearce, S.C. (1992) Breakthroughs in Statistics, Methodology and Distribution. *Springer Series  
1487           in Statistics*. 59–65. doi:10.1007/978-1-4612-4380-9\_5.
- 1488   Pikkarainen, S., Tokola, H., Kerkelä, R. & Ruskoaho, H. (2004) GATA transcription factors in  
1489           the developing and adult heart. *Cardiovascular Research*. 63 (2), 196–207.  
1490           doi:10.1016/j.cardiores.2004.03.025.
- 1491   Probst, S., Sagar, S., Tomic, J., Schwan, C., Grün, D. & Arnold, S.J. (2020) Spatiotemporal  
1492           sequence of mesoderm and endoderm lineage segregation during mouse gastrulation.  
1493           *Development*. 148 (1), dev193789. doi:10.1242/dev.193789.
- 1494   Pursani, V., Pethe, P., Bashir, M., Sampath, P., Tanavde, V. & Bhartiya, D. (2017) Genetic and  
1495           Epigenetic Profiling Reveals EZH2-mediated Down Regulation of OCT-4 Involves  
1496           NR2F2 during Cardiac Differentiation of Human Embryonic Stem Cells. *Scientific  
1497           Reports*. 7 (1), 13051. doi:10.1038/s41598-017-13442-9.
- 1498   Reifers, F., Walsh, E.C., Leger, S., Stainier, D.Y. & Brand, M. (2000) Induction and  
1499           differentiation of the zebrafish heart requires fibroblast growth factor 8 (fgf8/acerebellar).  
1500           *Development*. 127 (2), 225–235. doi:10.1242/dev.127.2.225.

- 1501 Rojas, A., Val, S.D., Heidt, A.B., Xu, S.-M., Bristow, J. & Black, B.L. (2005) Gata4 expression  
1502 in lateral mesoderm is downstream of BMP4 and is activated directly by Forkhead and  
1503 GATA transcription factors through a distal enhancer element. *Development*. 132 (15),  
1504 3405–3417. doi:10.1242/dev.01913.
- 1505 Saga, Y. (1998) Genetic rescue of segmentation defect in MesP2-deficient mice by MesP1 gene  
1506 replacement. *Mechanisms of Development*. 75 (1–2), 53–66. doi:10.1016/s0925-  
1507 4773(98)00077-x.
- 1508 Saga, Y., Hata, N., Kobayashi, S., Magnuson, T., Seldin, M.F. & Taketo, M.M. (1996) MesP1: a  
1509 novel basic helix-loop-helix protein expressed in the nascent mesodermal cells during  
1510 mouse gastrulation. *Development*. 122 (9), 2769–2778. doi:10.1242/dev.122.9.2769.
- 1511 Saga, Y., Kitajima, S. & Miyagawa-Tomita, S. (2000) Mesp1 Expression Is the Earliest Sign of  
1512 Cardiovascular Development. *Trends in Cardiovascular Medicine*. 10 (8), 345–352.  
1513 doi:10.1016/s1050-1738(01)00069-x.
- 1514 Saga, Y., Miyagawa-Tomita, S., Takagi, A., Kitajima, S., Miyazaki, J. i & Inoue, T. (1999)  
1515 MesP1 is expressed in the heart precursor cells and required for the formation of a single  
1516 heart tube. *Development*. 126 (15), 3437–3447. doi:10.1242/dev.126.15.3437.
- 1517 Sang, T., Yang, J., Liu, J., Han, Y., Li, Y., Zhou, X. & Wang, X. (2021) AMOT suppresses  
1518 tumor progression via regulating DNA damage response signaling in diffuse large B-cell  
1519 lymphoma. *Cancer Gene Therapy*. 28 (10–11), 1125–1135. doi:10.1038/s41417-020-  
1520 00258-5.
- 1521 Sarropoulos, I., Sepp, M., Frömel, R., Leiss, K., Trost, N., Leushkin, E., Okonechnikov, K.,  
1522 Joshi, P., Giere, P., Kutscher, L.M., Cardoso-Moreira, M., Pfister, S.M. & Kaessmann, H.  
1523 (2021) Developmental and evolutionary dynamics of cis-regulatory elements in mouse  
1524 cerebellar cells. *Science*. 373 (6558). doi:10.1126/science.abg4696.

- 1525 Satija, R., Farrell, J.A., Gennert, D., Schier, A.F. & Regev, A. (2015) Spatial reconstruction of  
1526 single-cell gene expression data. *Nature Biotechnology*. 33 (5), 495–502.  
1527 doi:10.1038/nbt.3192.
- 1528 Saykali, B., Mathiah, N., Nahaboo, W., Racu, M.-L., Hammou, L., Defrance, M. & Migeotte, I.  
1529 (2019) Distinct mesoderm migration phenotypes in extra-embryonic and embryonic  
1530 regions of the early mouse embryo. *eLife*. 8, e42434. doi:10.7554/elife.42434.
- 1531 Schachterle, W., Rojas, A., Xu, S.-M. & Black, B.L. (2012) ETS-dependent regulation of a distal  
1532 Gata4 cardiac enhancer. *Developmental Biology*. 361 (2), 439–449.  
1533 doi:10.1016/j.ydbio.2011.10.023.
- 1534 Schep, A.N., Wu, B., Buenrostro, J.D. & Greenleaf, W.J. (2017) chromVAR: inferring  
1535 transcription-factor-associated accessibility from single-cell epigenomic data. *Nature*  
1536 *Methods*. 14 (10), 975–978. doi:10.1038/nmeth.4401.
- 1537 Schwartz, B., Marks, M., Wittler, L., Werber, M., Währisch, S., Nordheim, A., Herrmann, B.G.  
1538 & Grote, P. (2014) SRF is essential for mesodermal cell migration during elongation of  
1539 the embryonic body axis. *Mechanisms of Development*. 133, 23–35.  
1540 doi:10.1016/j.mod.2014.07.001.
- 1541 Searcy, R.D., Vincent, E.B., Liberatore, C.M. & Yutzey, K.E. (1998) A GATA-dependent nkx-  
1542 2.5 regulatory element activates early cardiac gene expression in transgenic mice.  
1543 *Development*. 125 (22), 4461–4470. doi:10.1242/dev.125.22.4461.
- 1544 Seo, S. & Kume, T. (2006) Forkhead transcription factors, Foxc1 and Foxc2, are required for the  
1545 morphogenesis of the cardiac outflow tract. *Developmental Biology*. 296 (2), 421–436.  
1546 doi:10.1016/j.ydbio.2006.06.012.
- 1547 Shi, D.-L. & Grifone, R. (2021) RNA-Binding Proteins in the Post-transcriptional Control of  
1548 Skeletal Muscle Development, Regeneration and Disease. *Frontiers in Cell and*  
1549 *Developmental Biology*. 9, 738978. doi:10.3389/fcell.2021.738978.



- 1550 Simon, C.S., Downes, D.J., Gosden, M.E., Telenius, J., Higgs, D.R., Hughes, J.R., Costello, I.,  
1551 Bikoff, E.K. & Robertson, E.J. (2017) Functional characterisation of cis-regulatory  
1552 elements governing dynamic Eomes expression in the early mouse embryo. *Development*  
1553 (*Cambridge, England*). 144 (7), 1249–1260. doi:10.1242/dev.147322.
- 1554 Sinha, T., Lin, L., Li, D., Davis, J., Evans, S., Wynshaw-Boris, A. & Wang, J. (2015) Mapping  
1555 the dynamic expression of Wnt11 and the lineage contribution of Wnt11-expressing cells  
1556 during early mouse development. *Developmental Biology*. 398 (2), 177–192.  
1557 doi:10.1016/j.ydbio.2014.11.005.
- 1558 Smemo, S., Campos, L.C., Moskowitz, I.P., Krieger, J.E., Pereira, A.C. & Nobrega, M.A. (2012)  
1559 Regulatory variation in a TBX5 enhancer leads to isolated congenital heart disease.  
1560 *Human Molecular Genetics*. 21 (14), 3255–3263. doi:10.1093/hmg/dds165.
- 1561 Soibam, B., Benham, A., Kim, J., Weng, K., Yang, L., Xu, X., Robertson, M., Azares, A.,  
1562 Cooney, A.J., Schwartz, R.J. & Liu, Y. (2015) Genome-Wide Identification of MESP1  
1563 Targets Demonstrates Primary Regulation Over Mesendoderm Gene Activity. *STEM*  
1564 *CELLS*. 33 (11), 3254–3265. doi:10.1002/stem.2111.
- 1565 Soysa, T.Y. de, Ranade, S.S., Okawa, S., Ravichandran, S., Huang, Y., Salunga, H.T., Schrickler,  
1566 A., Sol, A. del, Gifford, C.A. & Srivastava, D. (2019) Single-cell analysis of  
1567 cardiogenesis reveals basis for organ-level developmental defects. *Nature*. 572 (7767),  
1568 120–124. doi:10.1038/s41586-019-1414-x.
- 1569 Stefanovic, S., Laforest, B., Desvignes, J.-P., Lescroart, F., Argiro, L., Maurel-Zaffran, C.,  
1570 Salgado, D., Plaindoux, E., Bono, C.D., Pazur, K., Théveniau-Ruissy, M., Bérout, C.,  
1571 Puceat, M., Gavalas, A., Kelly, R.G. & Zaffran, S. (2020) Hox-dependent coordination of  
1572 mouse cardiac progenitor cell patterning and differentiation. *eLife*. 9, e55124.  
1573 doi:10.7554/elife.55124.
- 1574 Stuart, T., Butler, A., Hoffman, P., Hafemeister, C., Papalexi, E., Mauck, W.M., Hao, Y.,  
1575 Stoeckius, M., Smibert, P. & Satija, R. (2019) Comprehensive Integration of Single-Cell  
1576 Data. *Cell*. 177 (7), 1888-1902.e21. doi:10.1016/j.cell.2019.05.031.

- 1577 Takeuchi, J.K., Lickert, H., Bisgrove, B.W., Sun, X., Yamamoto, M., Chawengsaksophak, K.,  
1578 Hamada, H., Yost, H.J., Rossant, J. & Bruneau, B.G. (2007) Baf60c is a nuclear Notch  
1579 signaling component required for the establishment of left–right asymmetry. *Proceedings*  
1580 *of the National Academy of Sciences*. 104 (3), 846–851. doi:10.1073/pnas.0608118104.
- 1581 Totic, J., Kim, G.-J., Pavlovic, M., Schröder, C.M., Mersiowsky, S.-L., Barg, M., Hofherr, A.,  
1582 Probst, S., Köttgen, M., Hein, L. & Arnold, S.J. (2019) Eomes and Brachyury control  
1583 pluripotency exit and germ-layer segregation by changing the chromatin state. *Nature*  
1584 *Cell Biology*. 21 (12), 1518–1531. doi:10.1038/s41556-019-0423-1.
- 1585 Vincentz, J.W., Firulli, B.A., Toolan, K.P., Arking, D.E., Sotoodehnia, N., Wan, J., Chen, P.-S.,  
1586 Vries, C. de G., Christoffels, V.M., Lohe, M.R. der & Firulli, A.B. (2019) Variation in a  
1587 Left Ventricle–Specific Hand1 Enhancer Impairs GATA Transcription Factor Binding  
1588 and Disrupts Conduction System Development and Function. *Circulation Research*. 125  
1589 (6), 575–589. doi:10.1161/circresaha.119.315313.
- 1590 Vincentz, J.W., Firulli, B.A., Toolan, K.P., Osterwalder, M., Pennacchio, L.A. & Firulli, A.B.  
1591 (2021) HAND transcription factors cooperatively specify the aorta and pulmonary trunk.  
1592 *Developmental Biology*. doi:10.1016/j.ydbio.2021.03.011.
- 1593 Wang, T., Yuan, J., Zhang, J., Tian, R., Ji, W., Zhou, Y., Yang, Y., Song, W., Zhang, F. & Niu,  
1594 R. (2015) Anxa2 binds to STAT3 and promotes epithelial to mesenchymal transition in  
1595 breast cancer cells. *Oncotarget*. 6 (31), 30975–30992. doi:10.18632/oncotarget.5199.
- 1596 Weninger, W.J., Floro, K.L., Bennett, M.B., Withington, S.L., Preis, J.I., Barbera, J.P.M.,  
1597 Mohun, T.J. & Dunwoodie, S.L. (2005) Cited2 is required both for heart morphogenesis  
1598 and establishment of the left-right axis in mouse development. *Development*. 132 (6),  
1599 1337–1348. doi:10.1242/dev.01696.
- 1600 Wilkinson, D.G. & Nieto, M.A. (1993) Detection of messenger RNA by in Situ hybridization to  
1601 tissue sections and whole mounts. *Methods in Enzymology*. 225, 361–373.  
1602 doi:10.1016/0076-6879(93)25025-w.

- 1603 Wu, S.M. (2008) *Mesp1* at the Heart of Mesoderm Lineage Specification. *Cell Stem Cell*. 3 (1),  
1604 1–2. doi:10.1016/j.stem.2008.06.017.
- 1605 Yin, J. & Wang, G. (2014) The Mediator complex: a master coordinator of transcription and cell  
1606 lineage development. *Development*. 141 (5), 977–987. doi:10.1242/dev.098392.
- 1607 Yuan, X., Scott, I.C. & Wilson, M.D. (2021) Heart Enhancers: Development and Disease  
1608 Control at a Distance. *Frontiers in Genetics*. 12, 642975.  
1609 doi:10.3389/fgene.2021.642975.
- 1610 Yuan, X., Song, M., Devine, P., Bruneau, B.G., Scott, I.C. & Wilson, M.D. (2018) Heart  
1611 enhancers with deeply conserved regulatory activity are established early in zebrafish  
1612 development. *Nature Communications*. 9 (1), 4977. doi:10.1038/s41467-018-07451-z.
- 1613 Zhu, L., Gomez-Duran, A., Saretzki, G., Jin, S., Tilgner, K., Melguizo-Sanchis, D., Anyfantis,  
1614 G., Al-Aama, J., Vallier, L., Chinnery, P., Lako, M. & Armstrong, L. (2016) The  
1615 mitochondrial protein CHCHD2 primes the differentiation potential of human induced  
1616 pluripotent stem cells to neuroectodermal lineages. *The Journal of Cell Biology*. 215 (2),  
1617 187–202. doi:10.1083/jcb.201601061.
- 1618 Zhu, S., Wurdak, H., Wang, J., Lyssiotis, C.A., Peters, E.C., Cho, C.Y., Wu, X. & Schultz, P.G.  
1619 (2009) A Small Molecule Primes Embryonic Stem Cells for Differentiation. *Cell Stem*  
1620 *Cell*. 4 (5), 416–426. doi:10.1016/j.stem.2009.04.001.
- 1621 Zug, R. (2022) Developmental disorders caused by haploinsufficiency of transcriptional  
1622 regulators: a perspective based on cell fate determination. *Biology Open*. 11 (1),  
1623 bio058896. doi:10.1242/bio.058896.
- 1624
- 1625
- 1626
- 1627
- 1628

**Fig. 1**

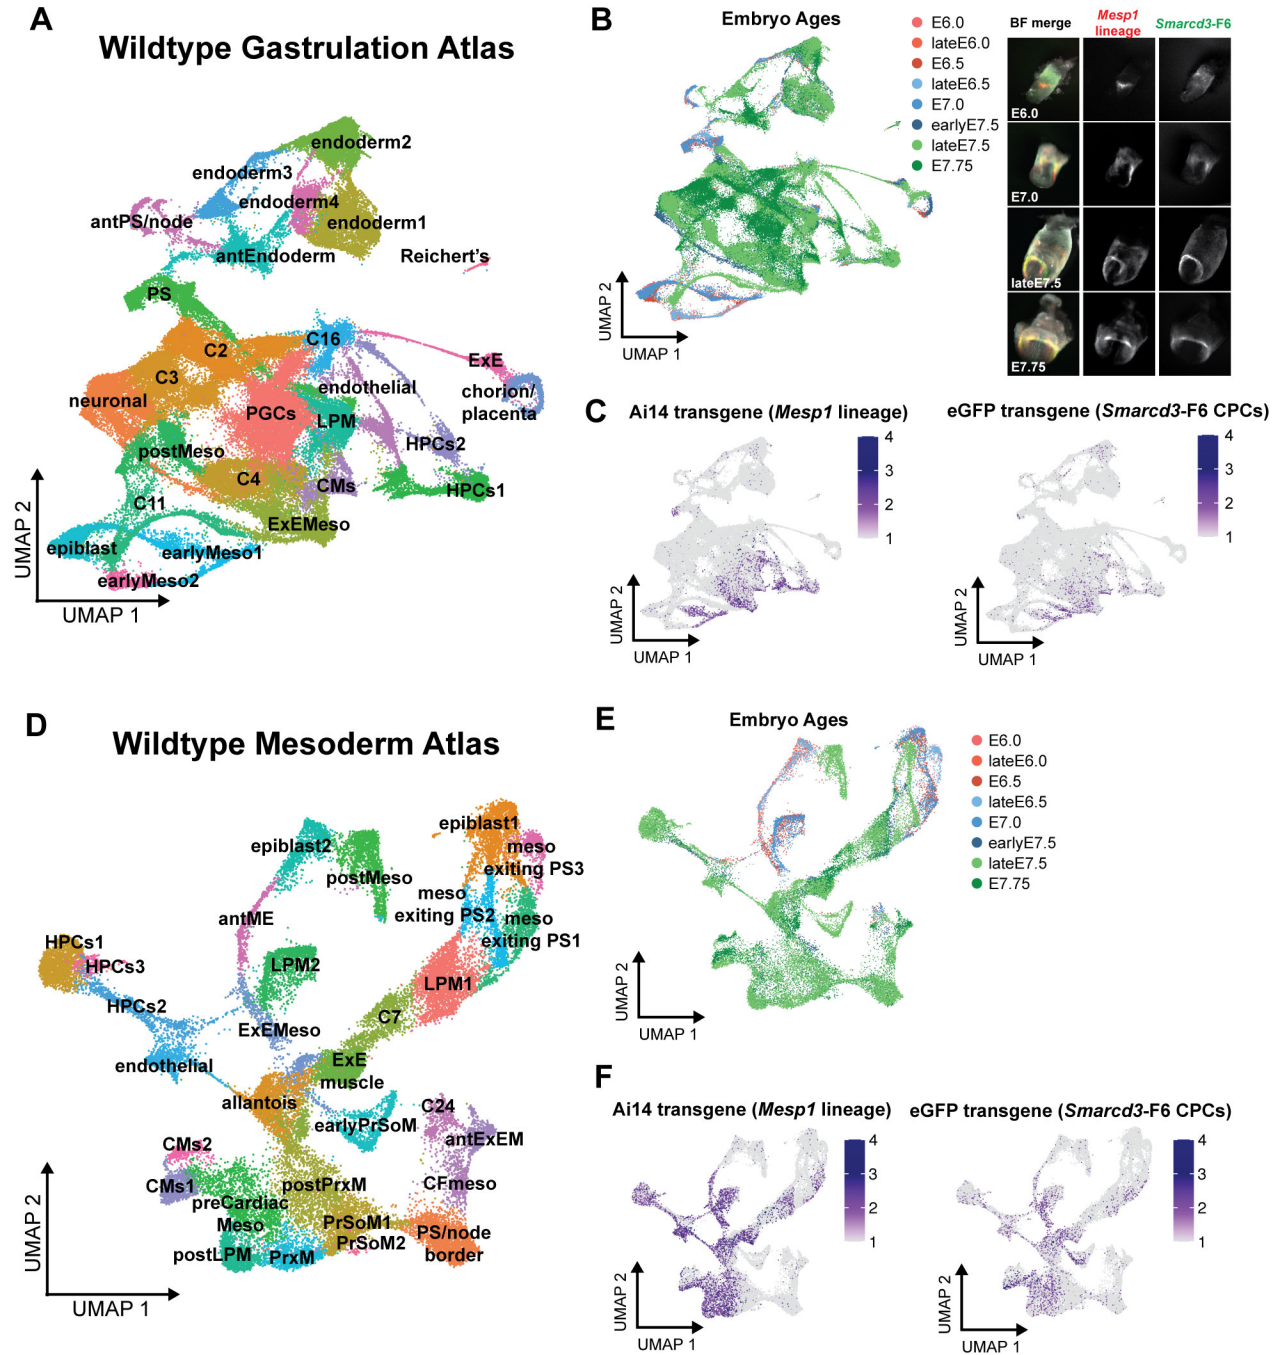



**Fig. 2**

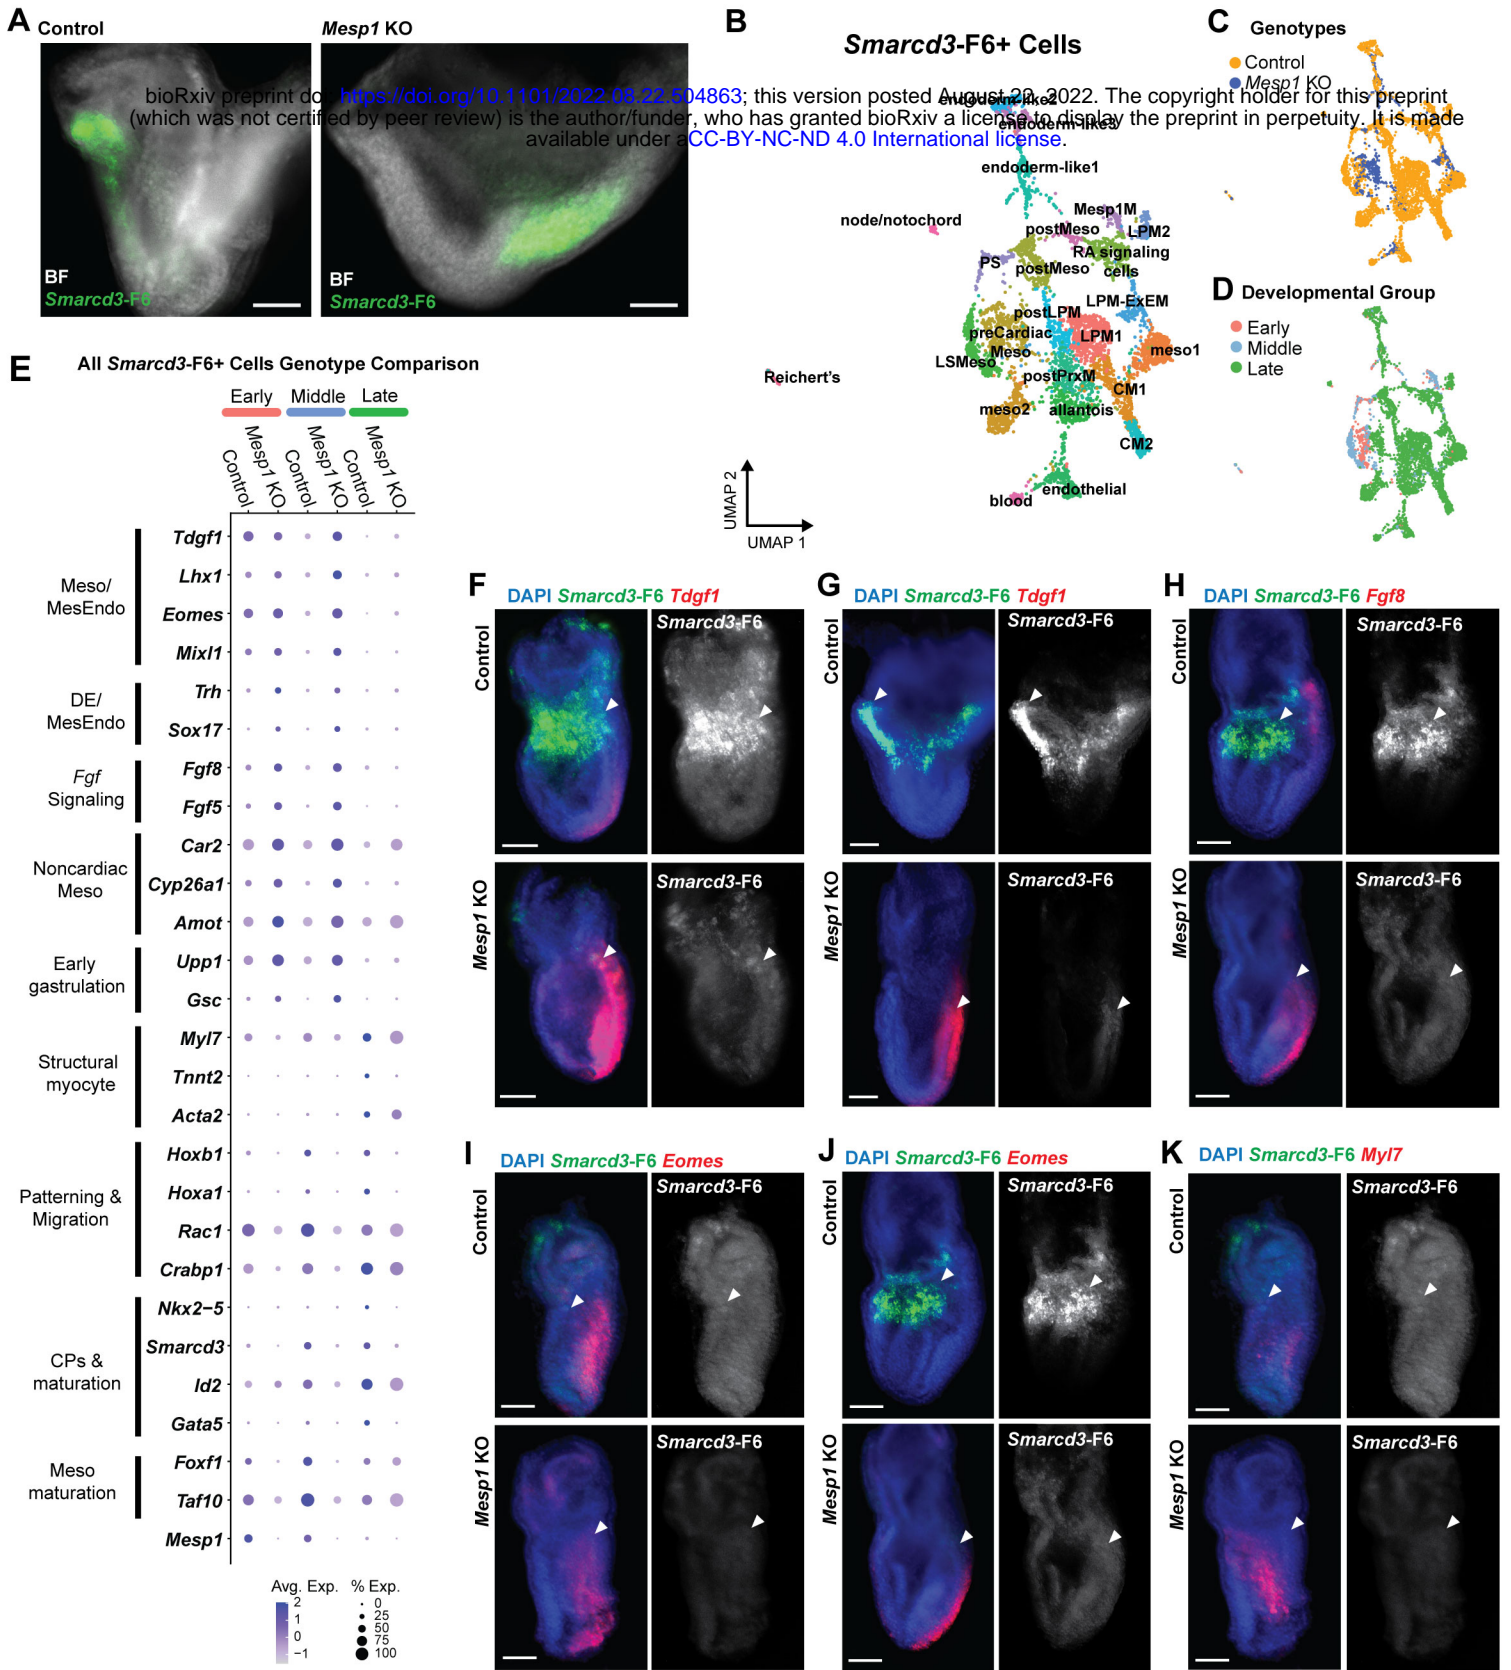

**Fig. 3.**

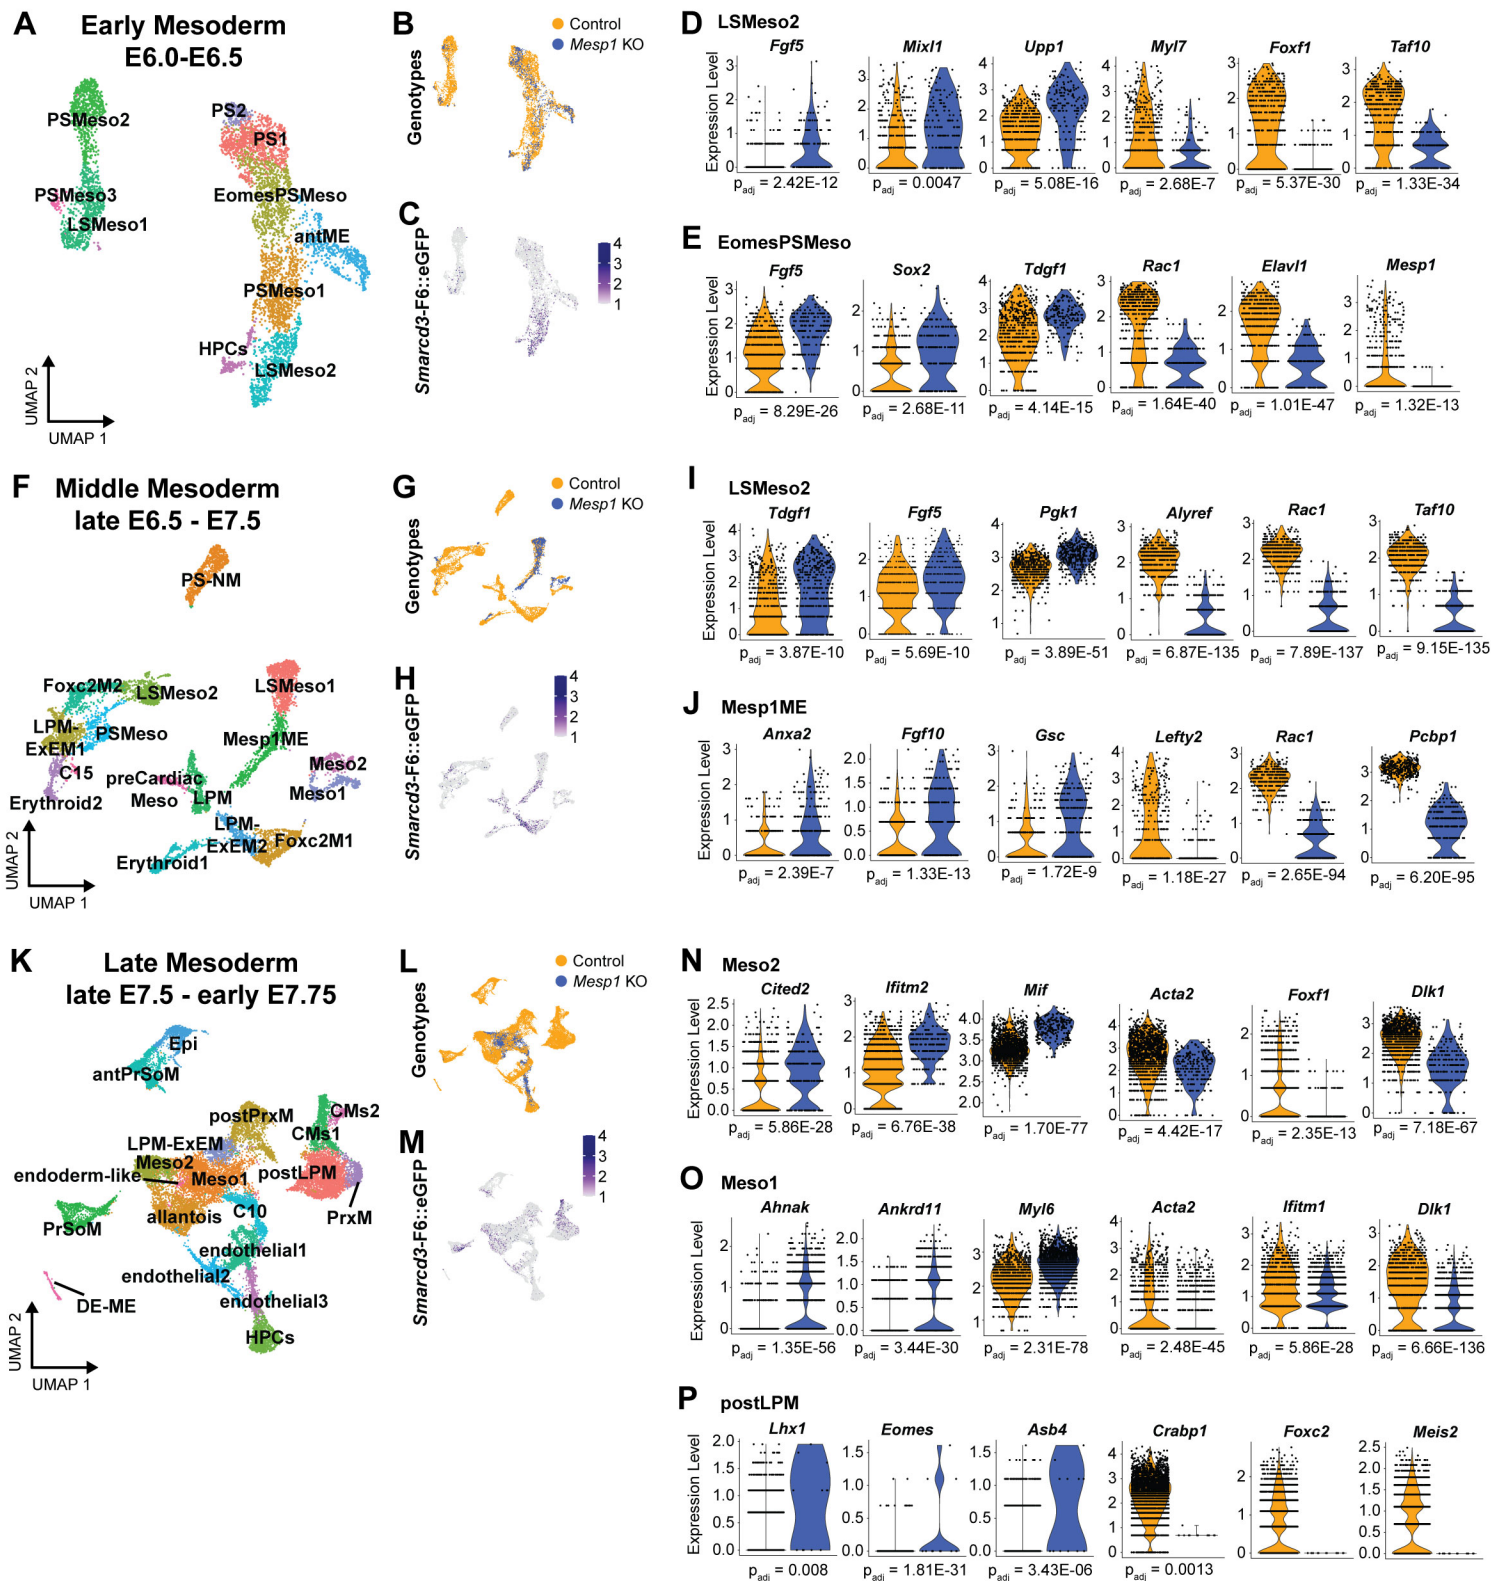



**Fig. 4**

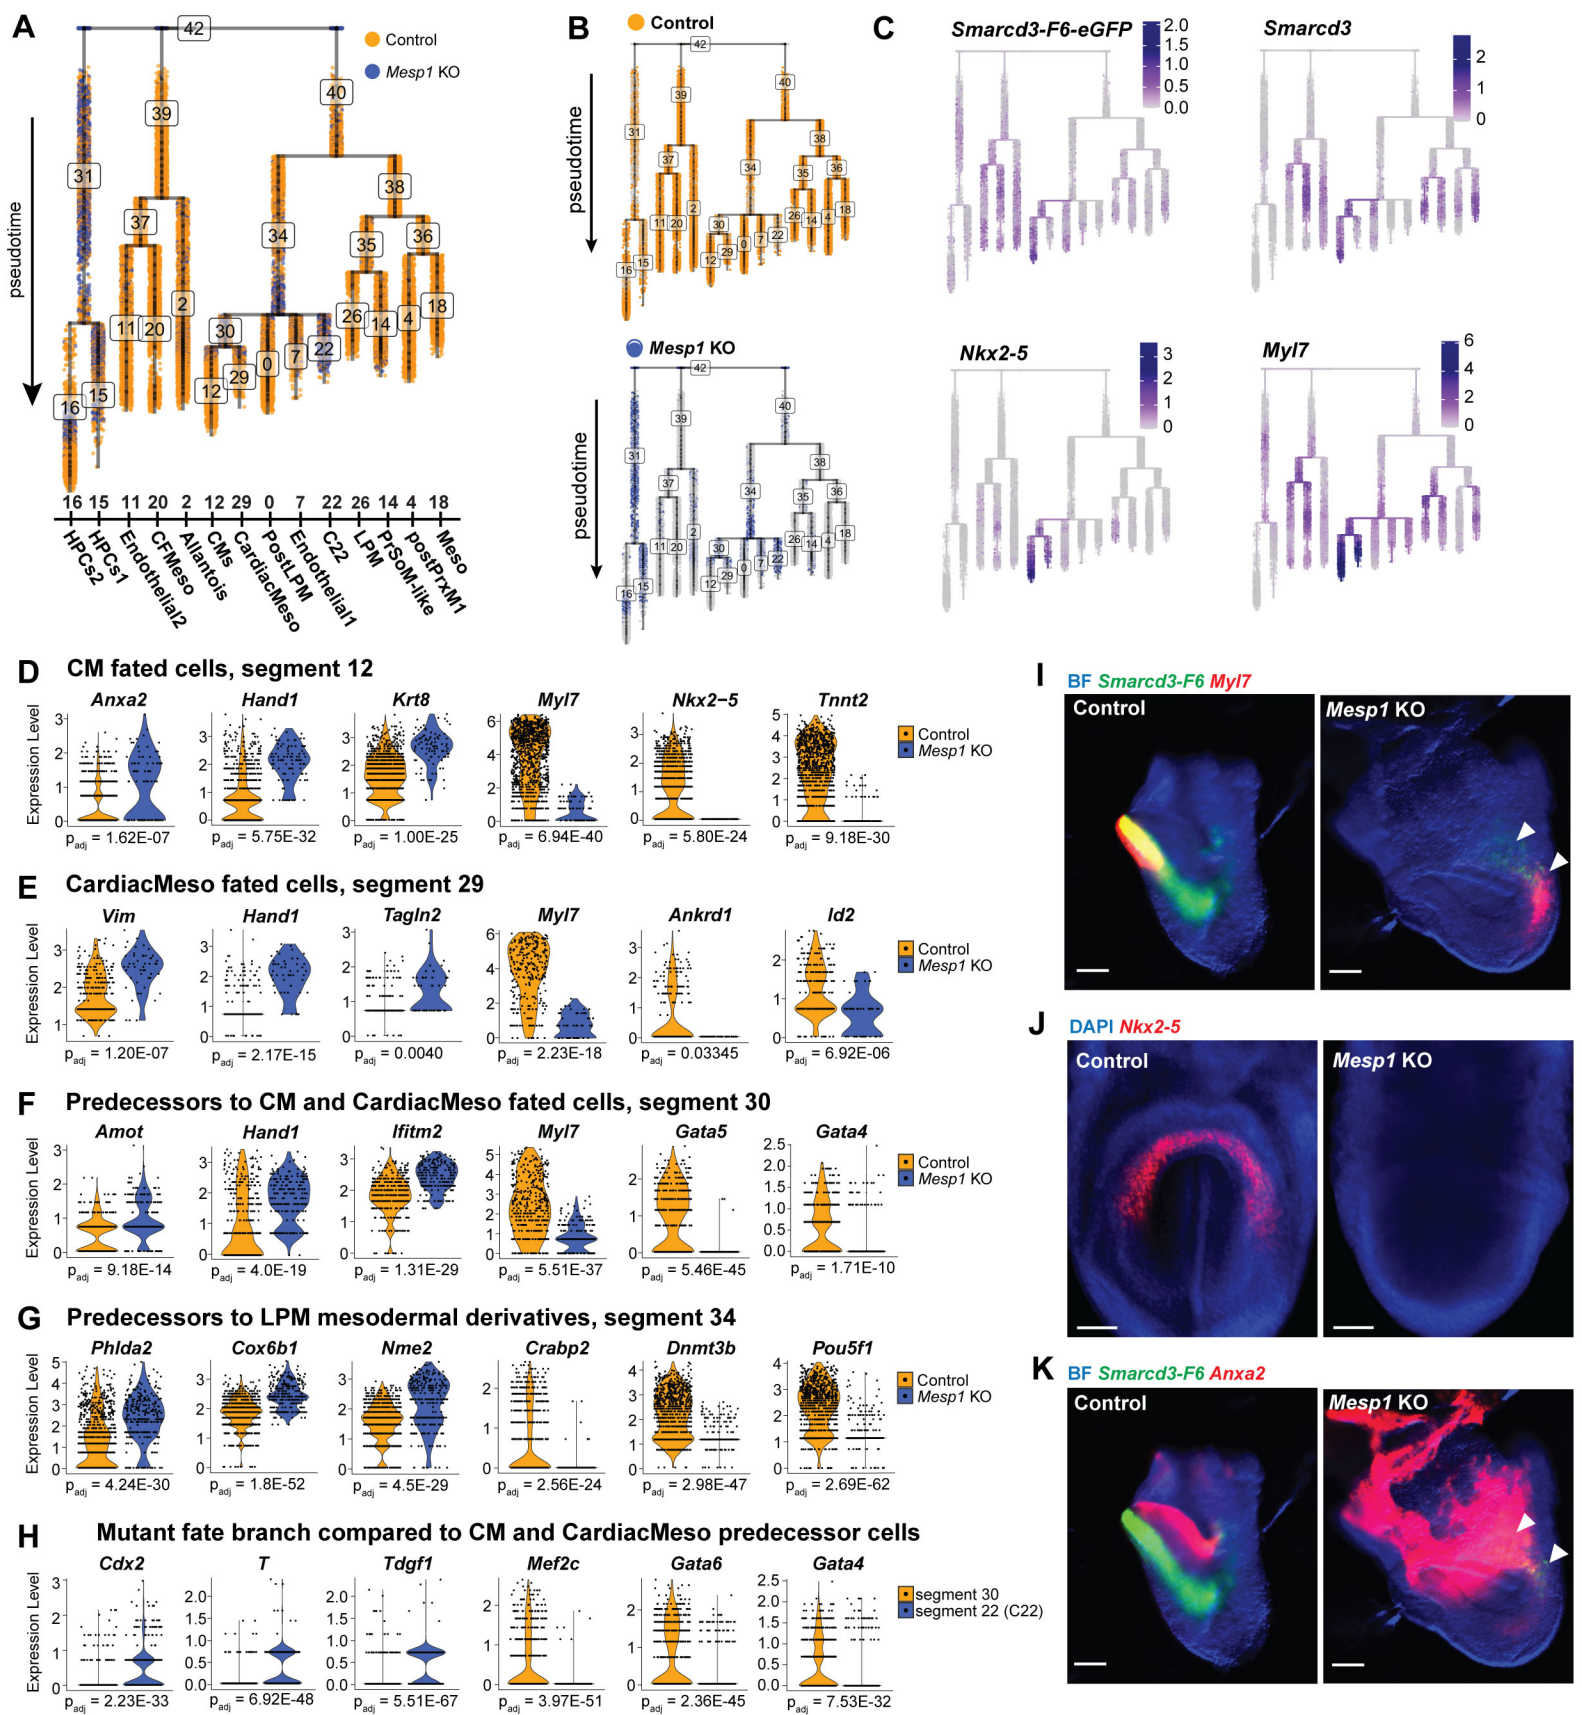



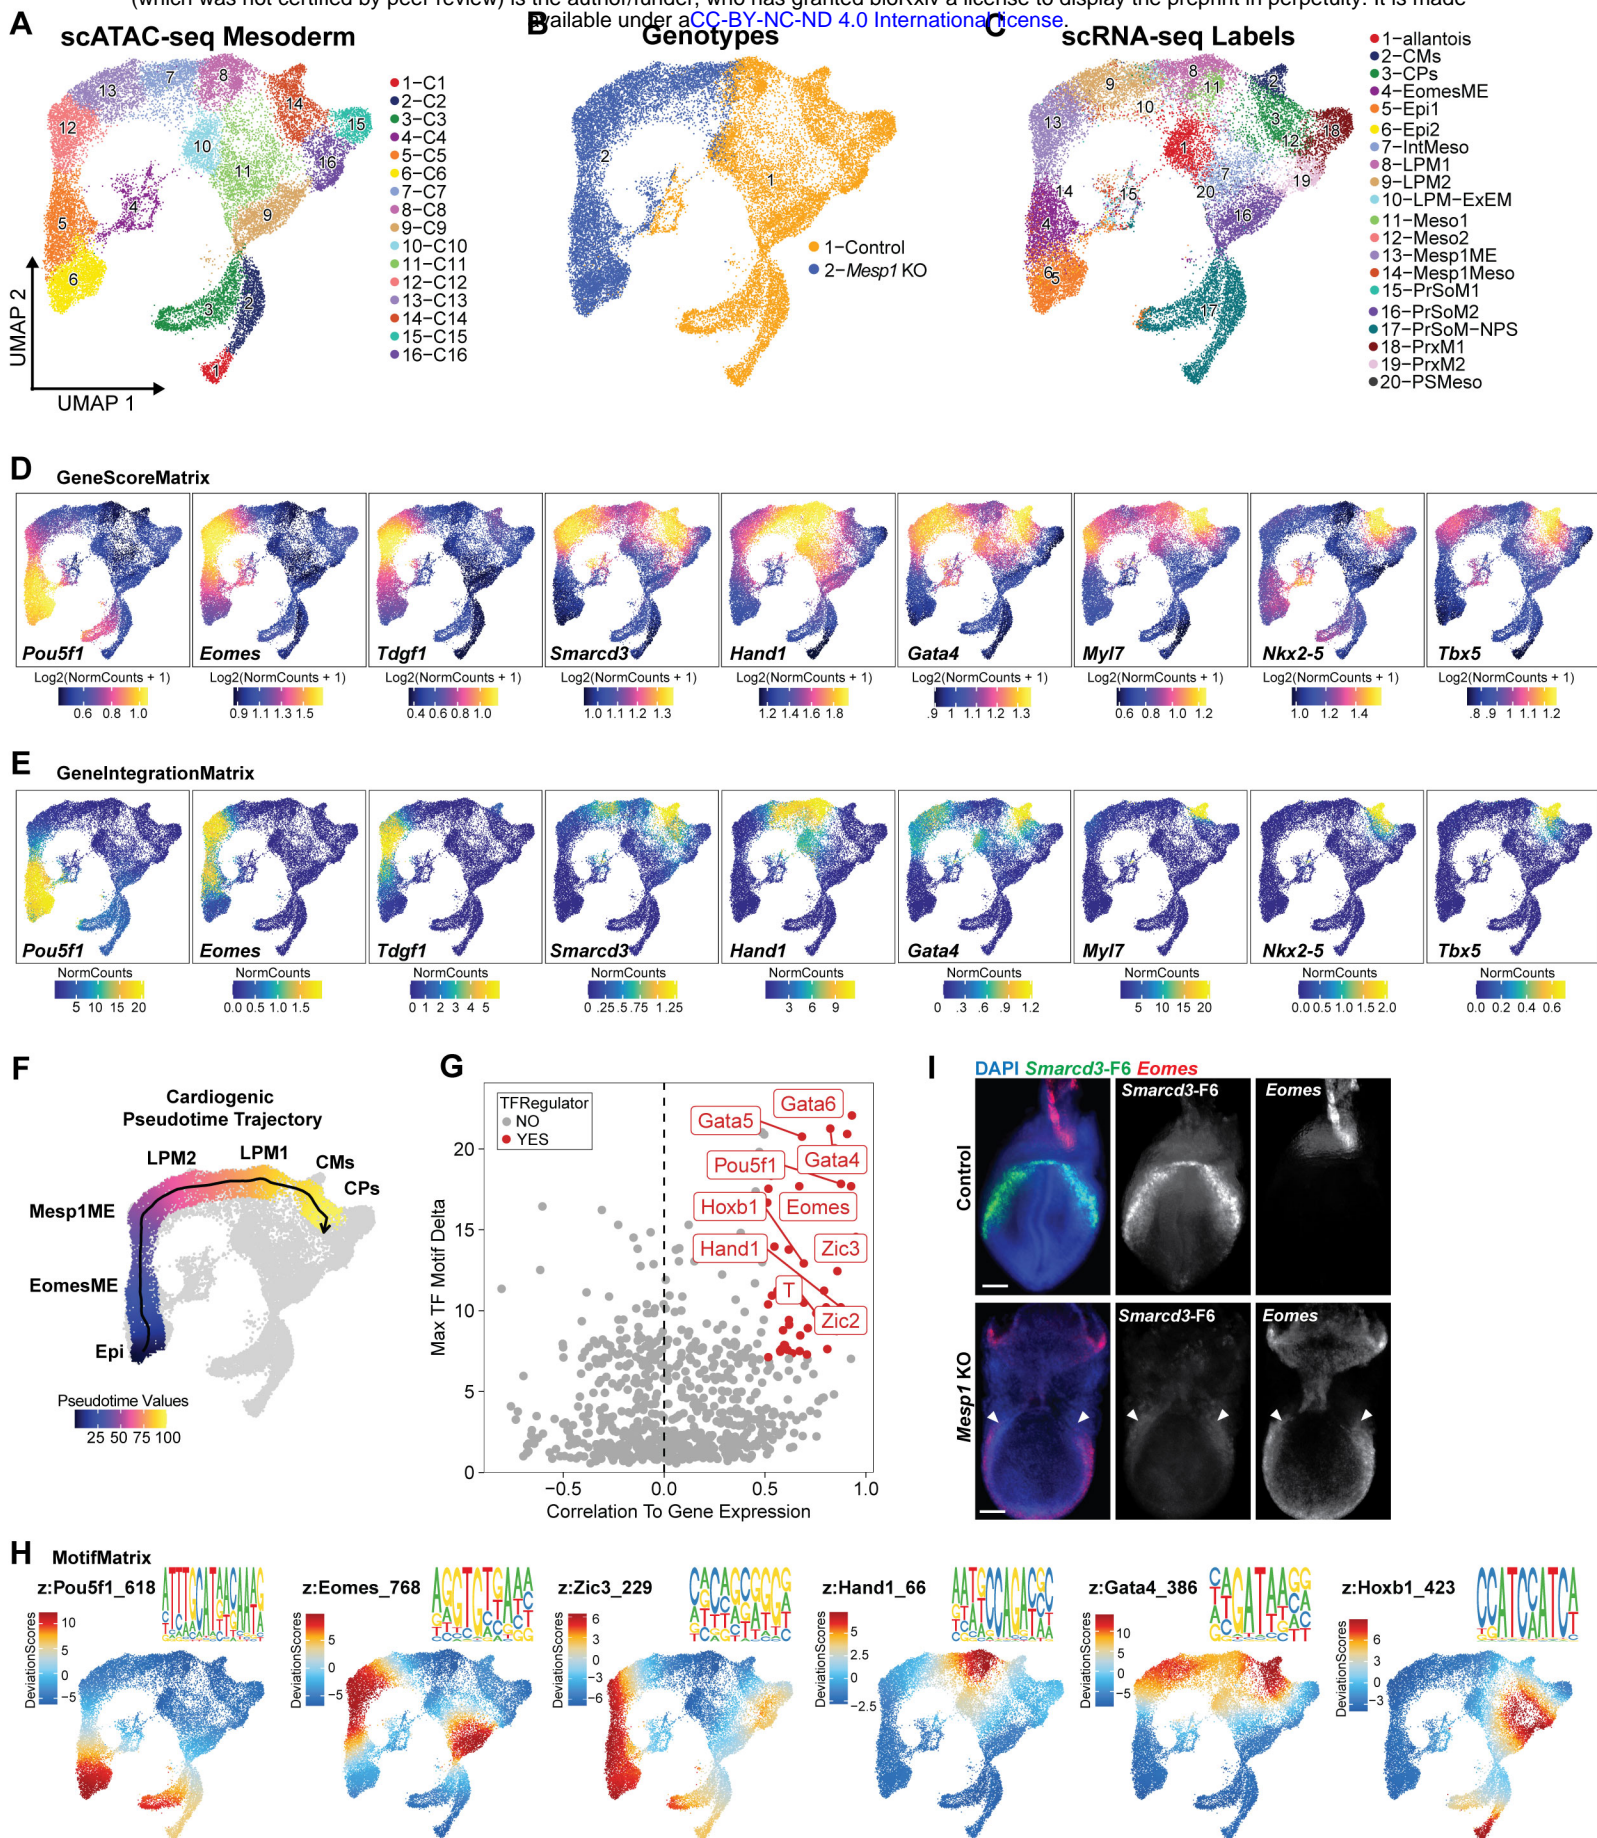

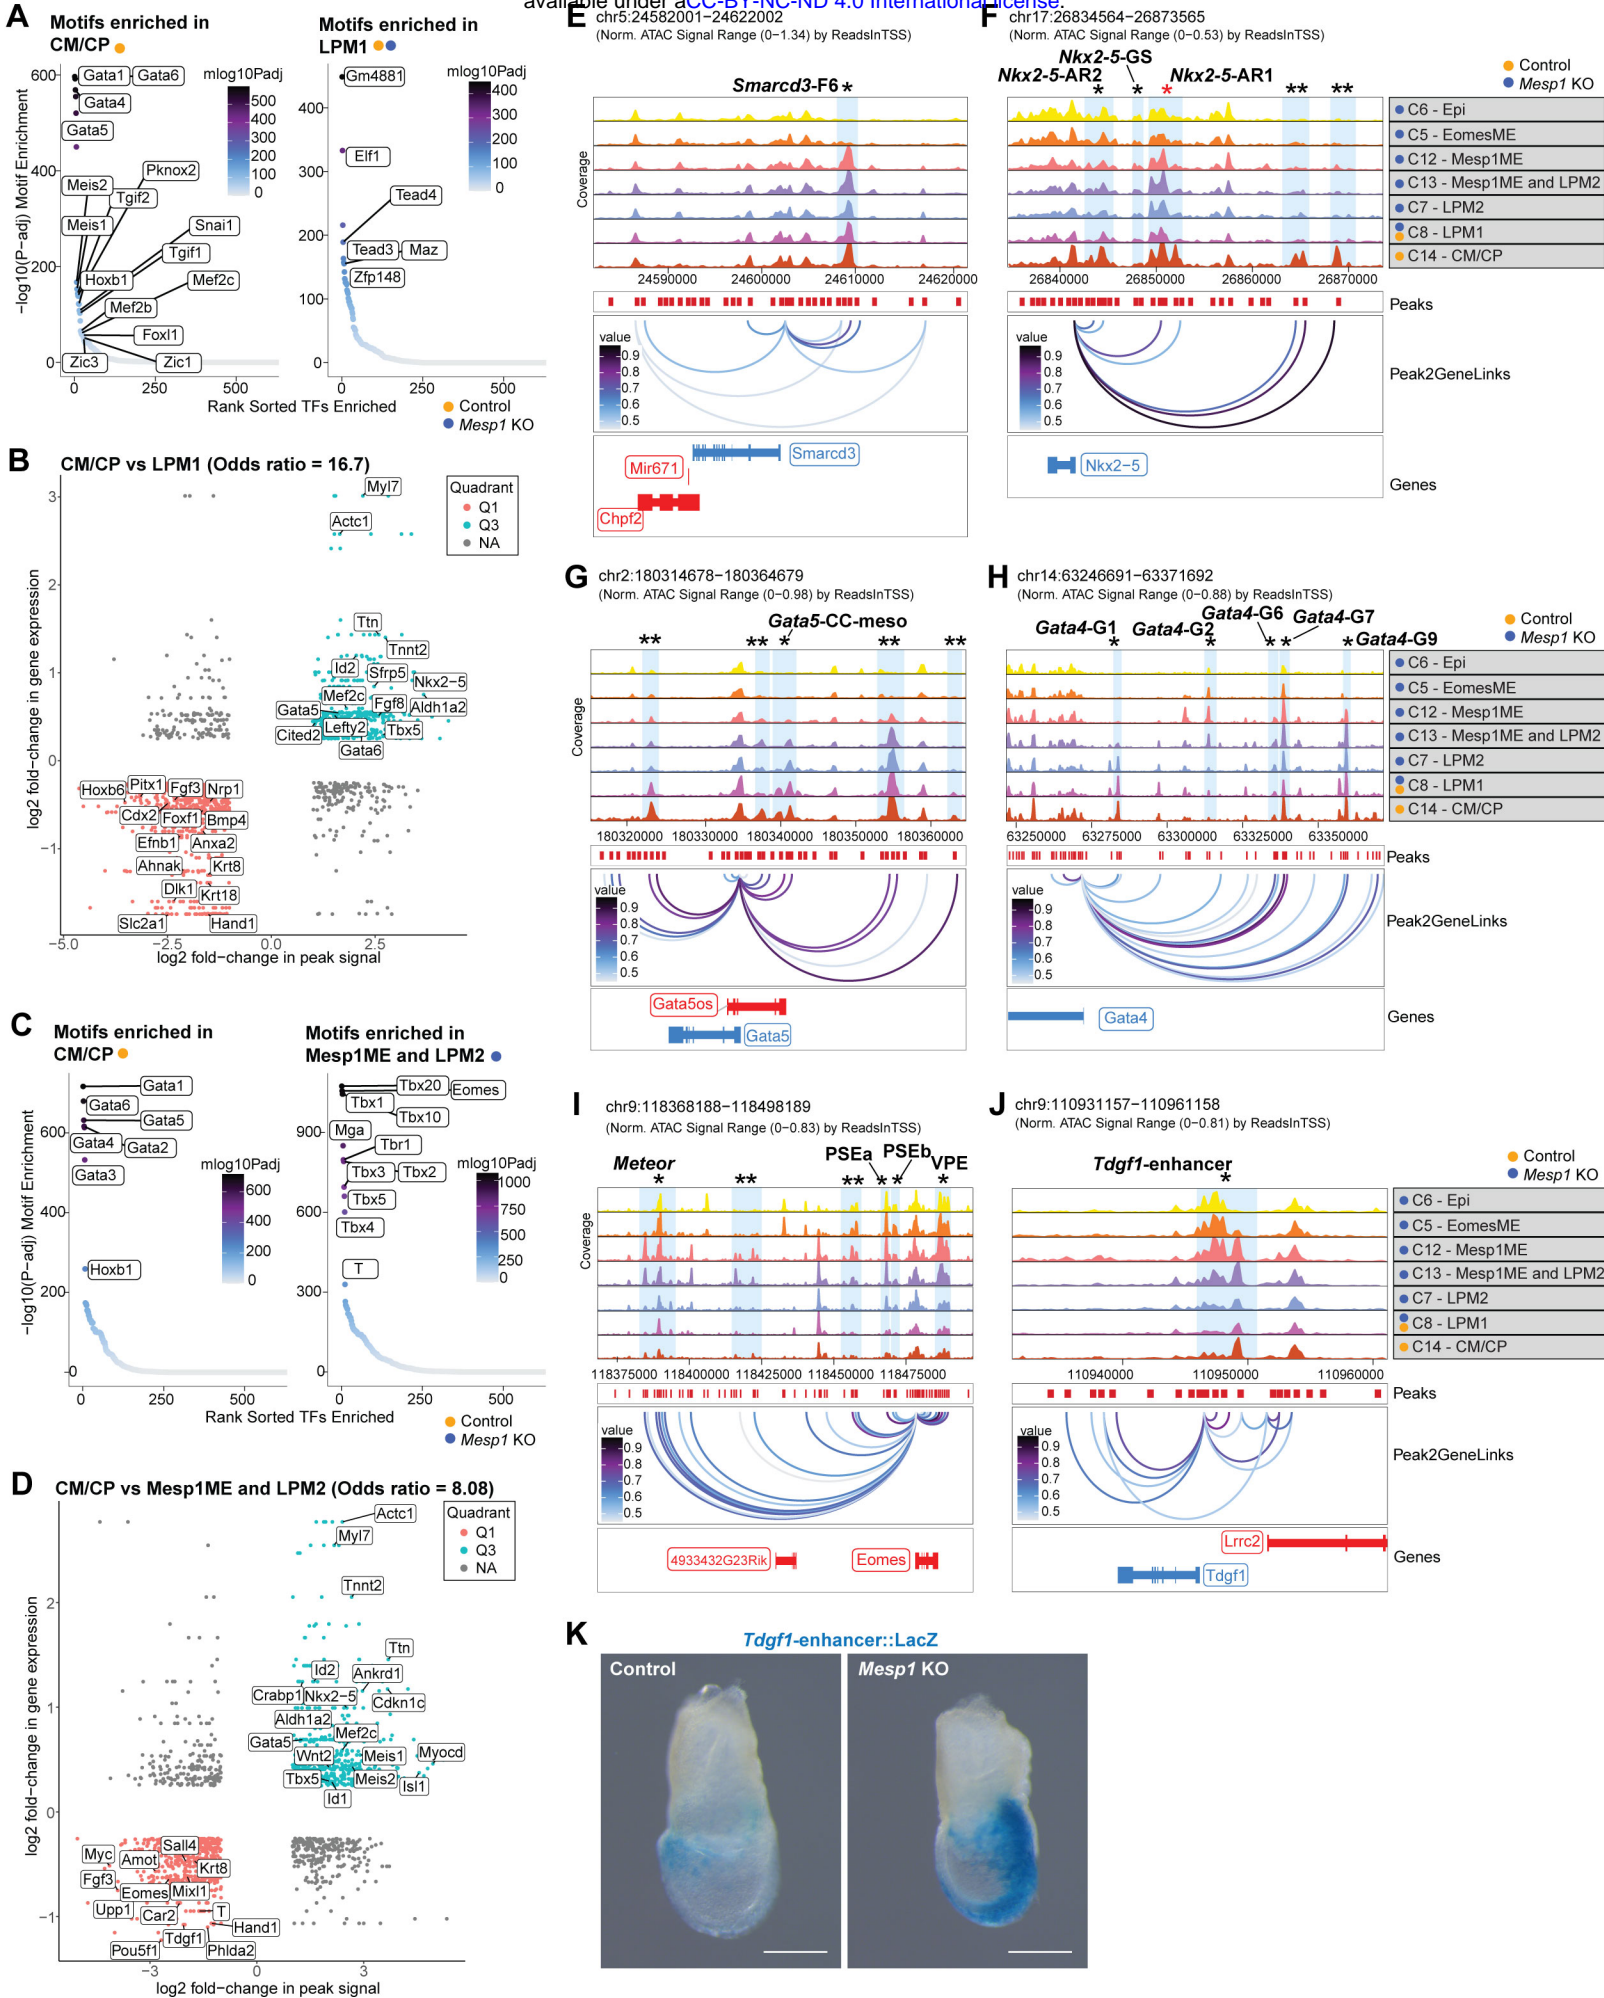



**Fig.7**

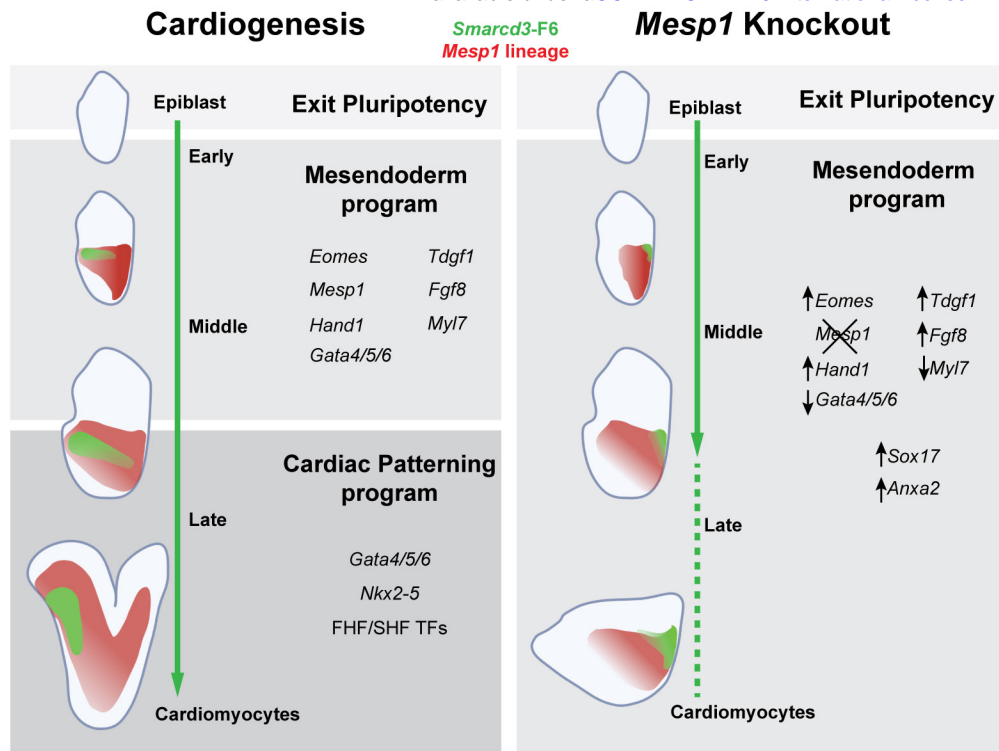

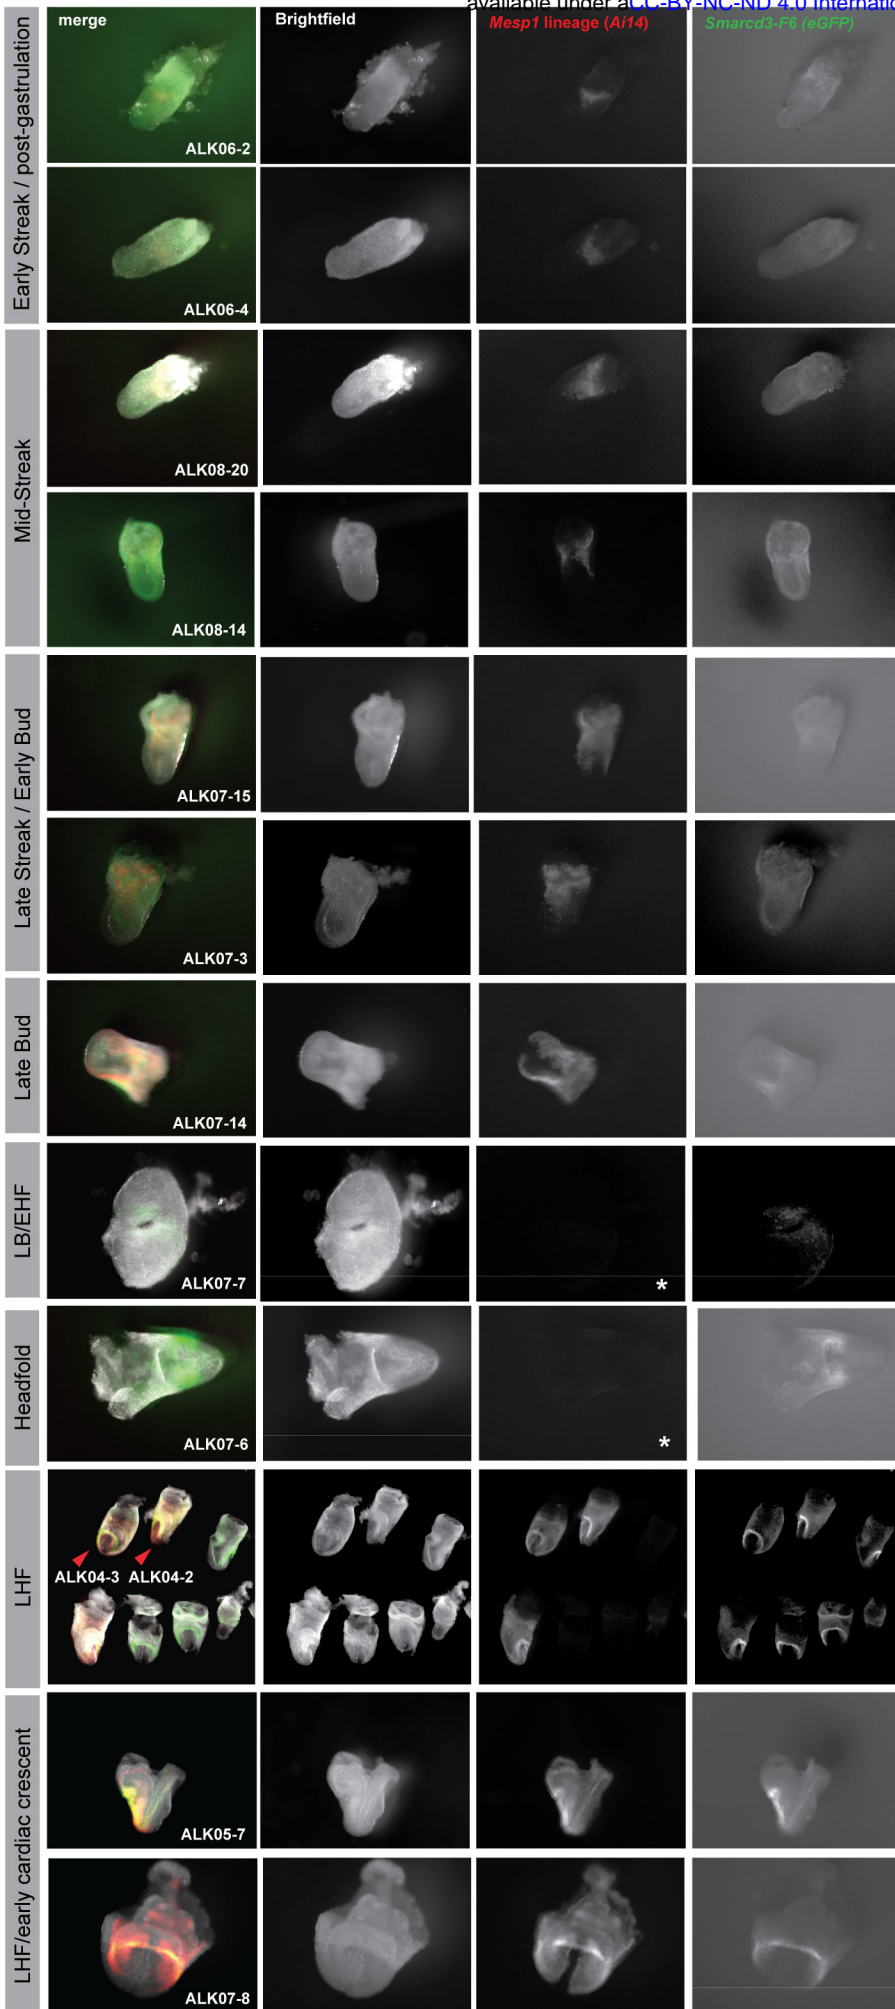

**A**

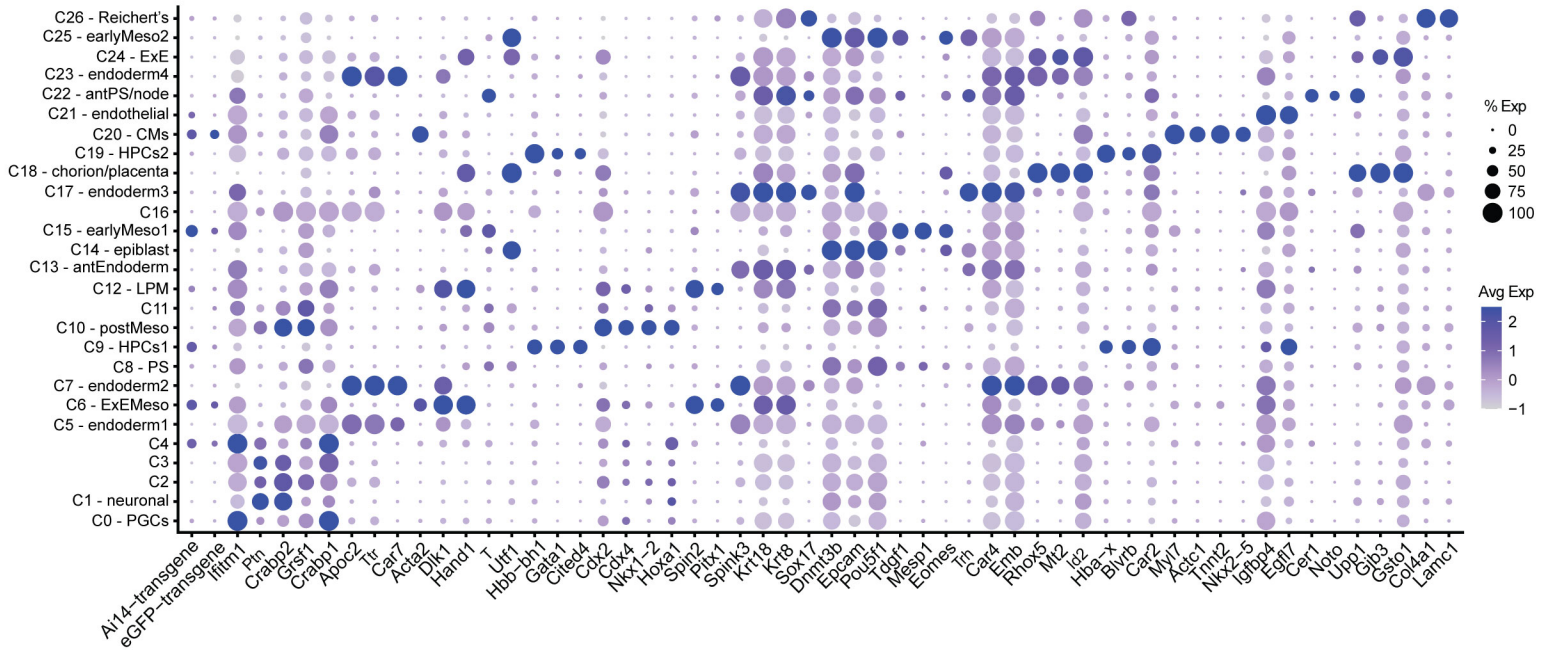

**B**

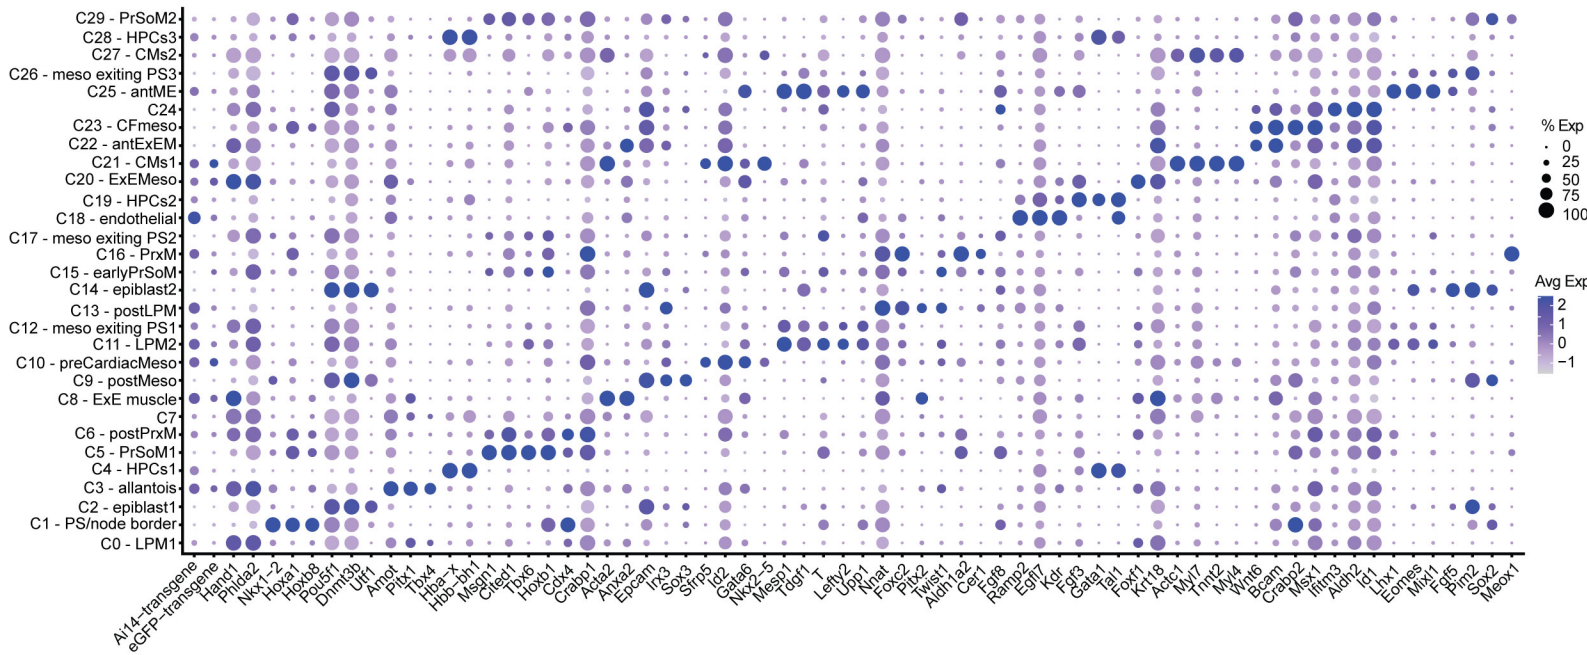

**Fig. S3**

**A Early cardiac and mesoderm genes**

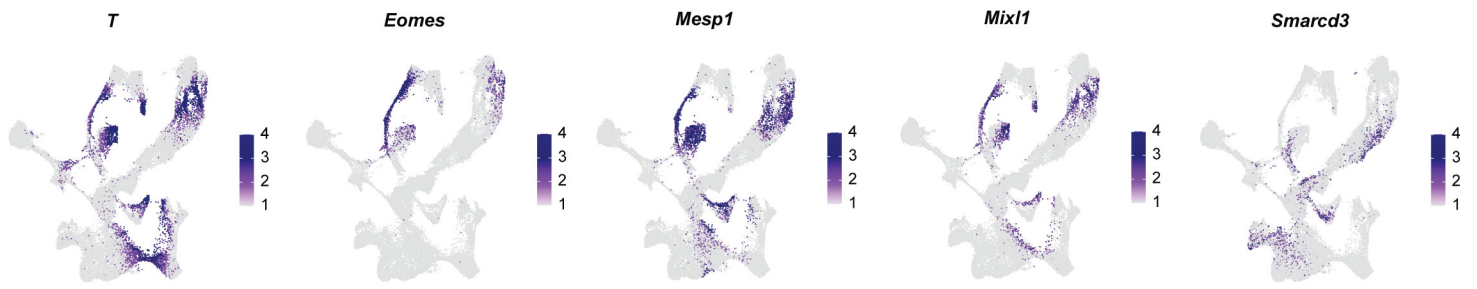

**B Structural cardiomyocyte genes**

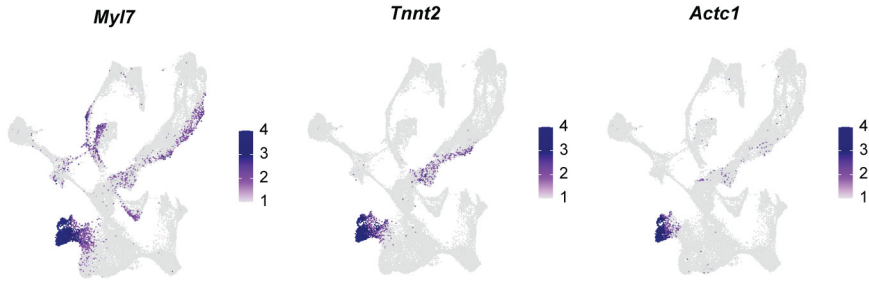

**C Cardiac transcription factors**

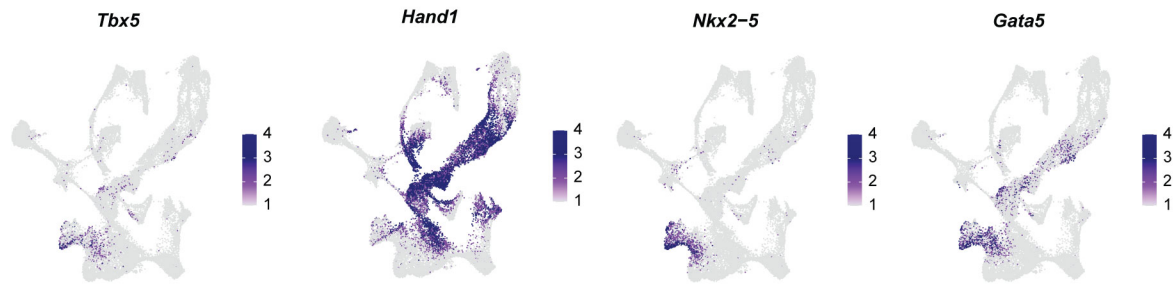



**A**

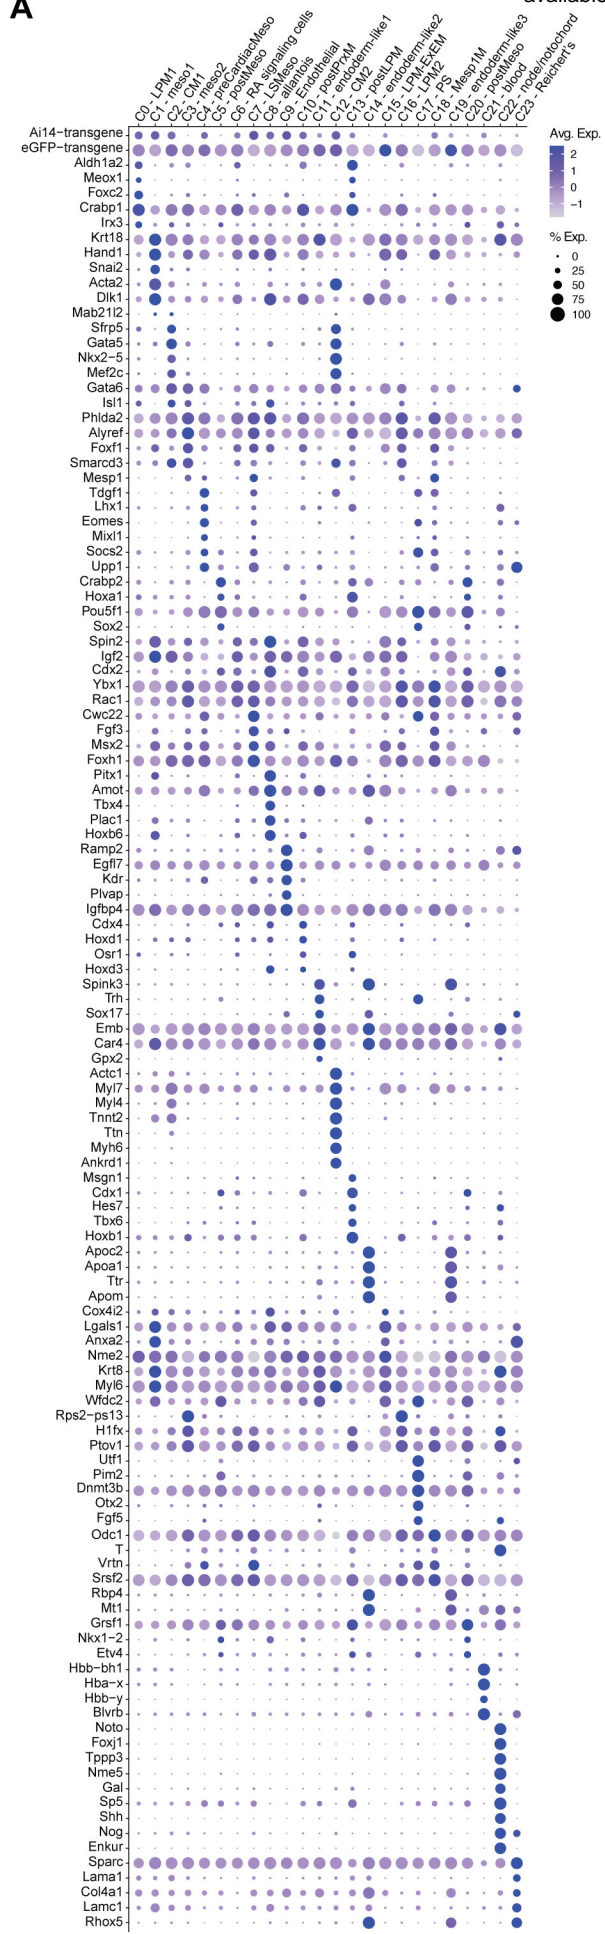

**B**

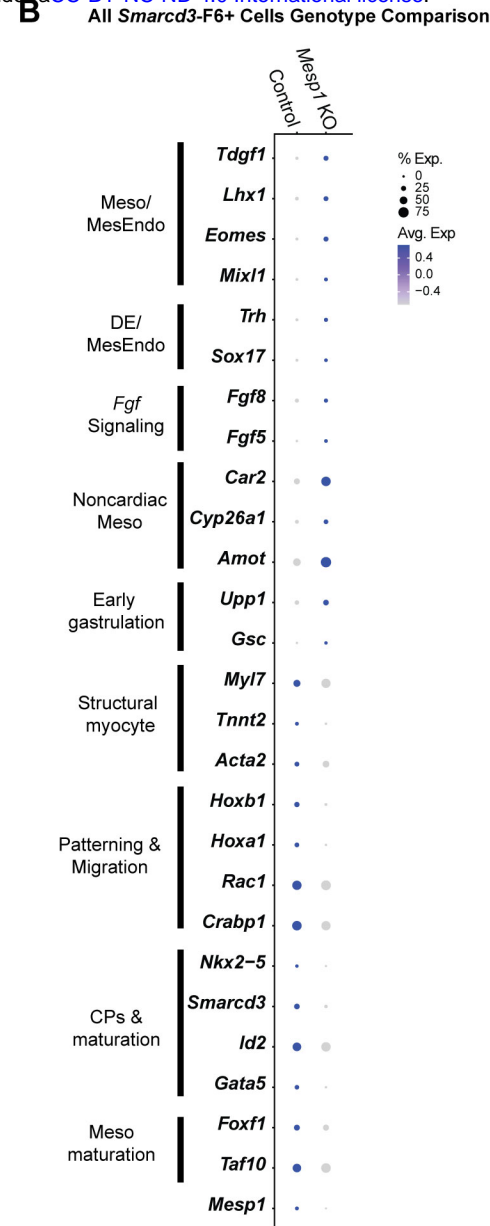

**C**

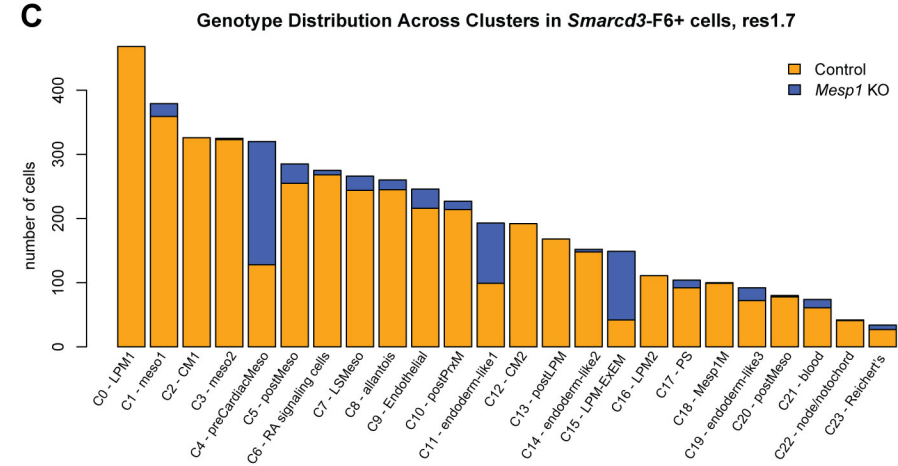

**A**

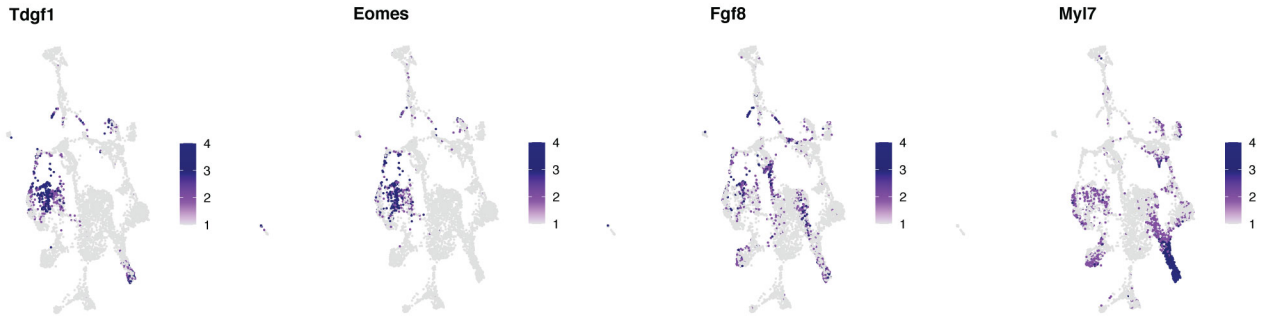

**B preCardiacMeso**

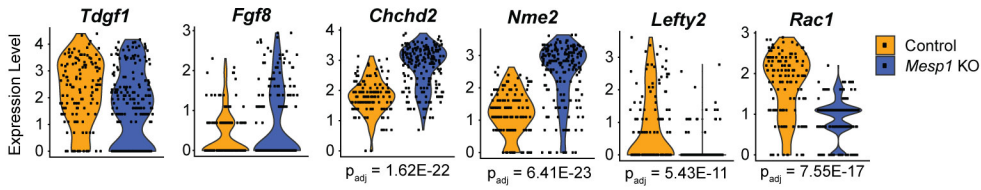

**C LSMeso**

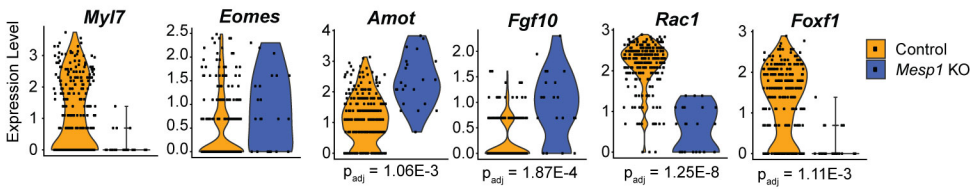

**D LPM-ExEM**

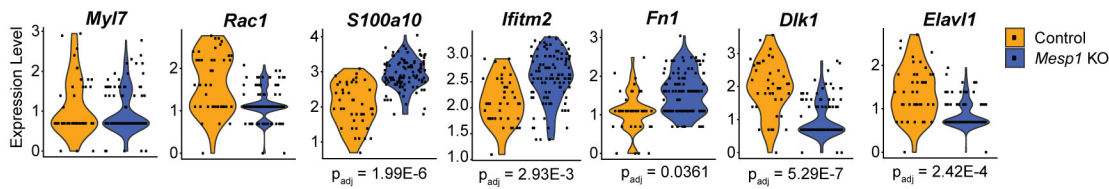

**E Endoderm-like1**

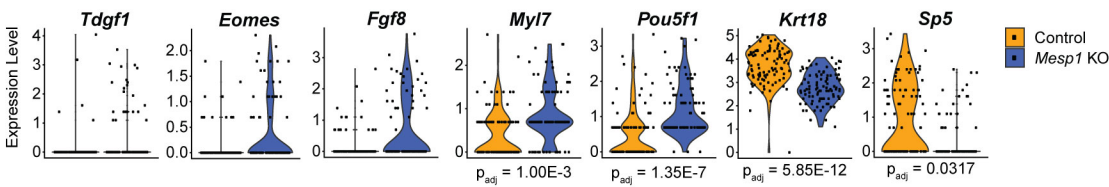





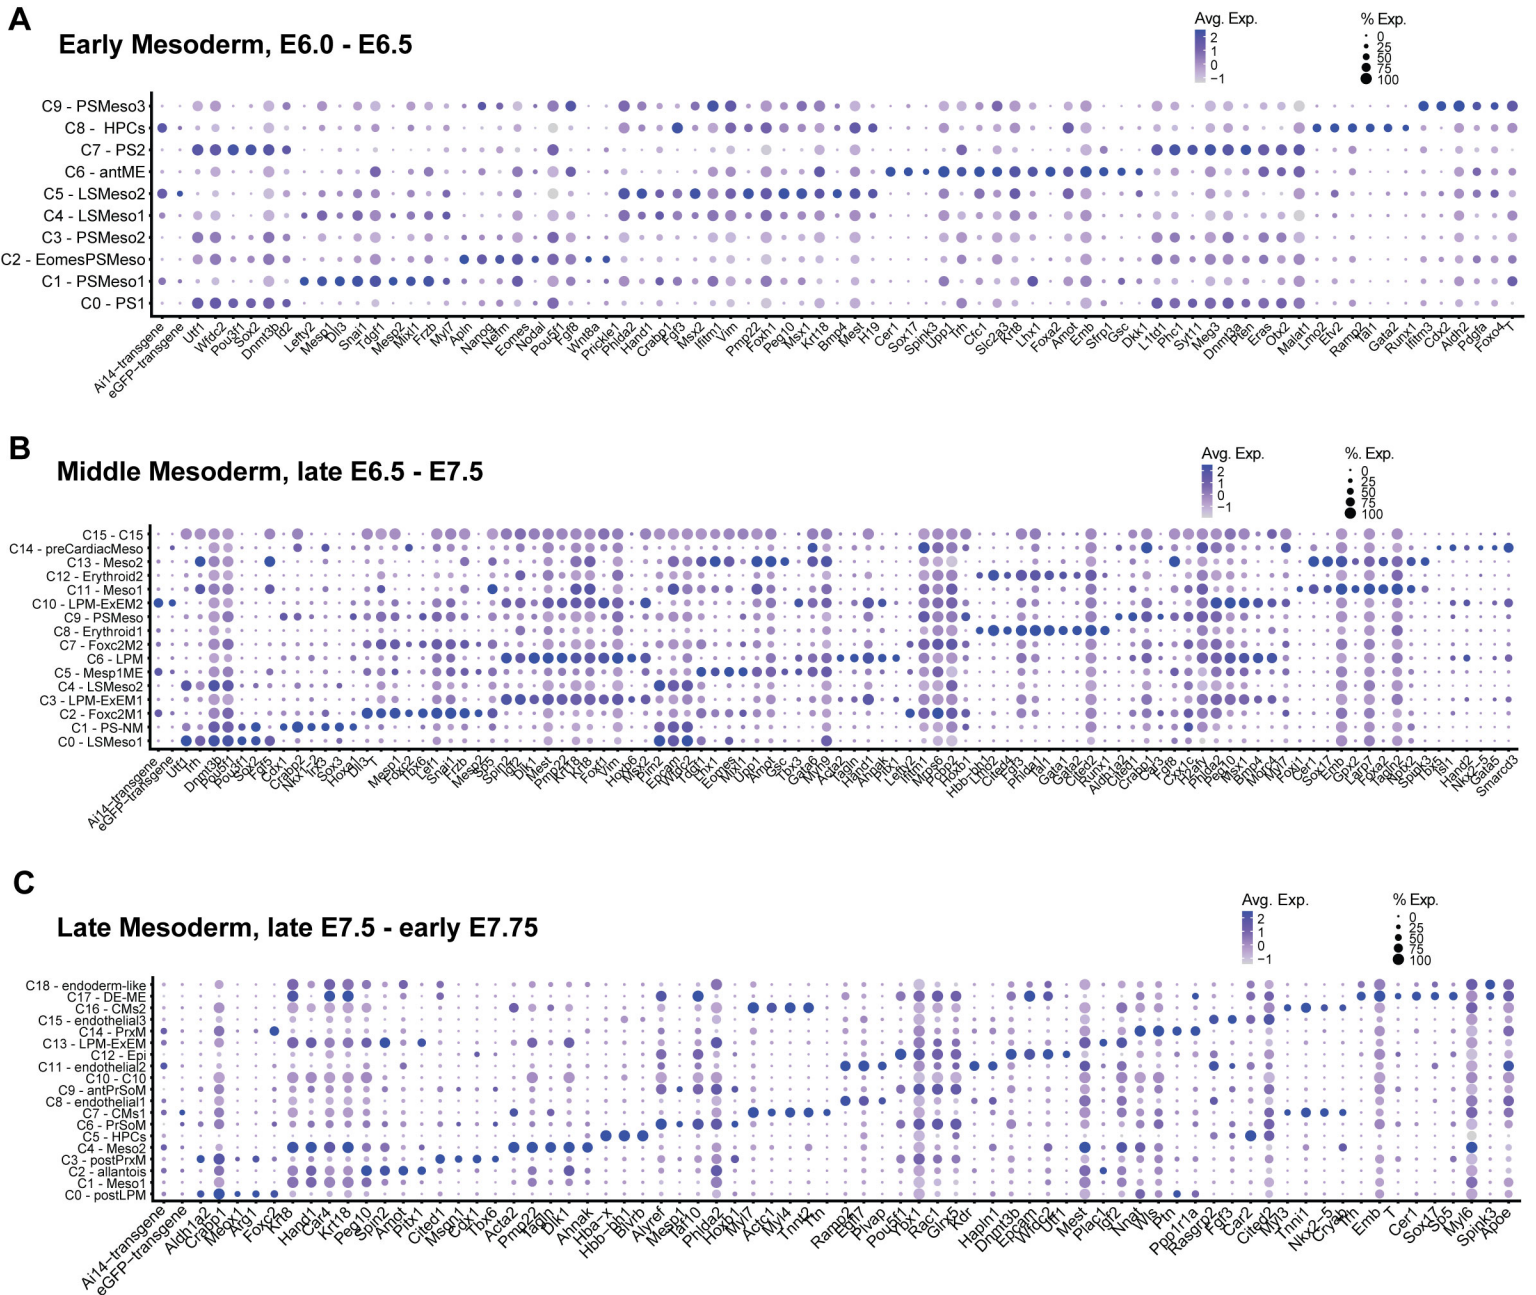

**Fig. S8**

**A**

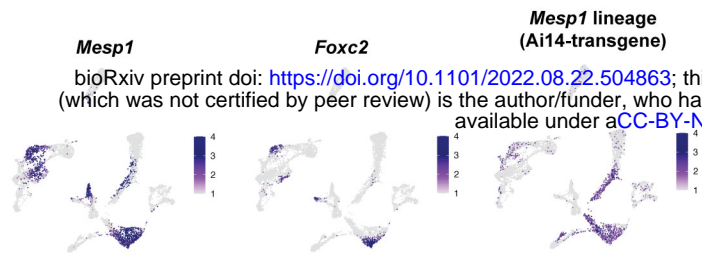

**B** *Foxc2 Smarcd3-F6 Cre (Mesp1)*

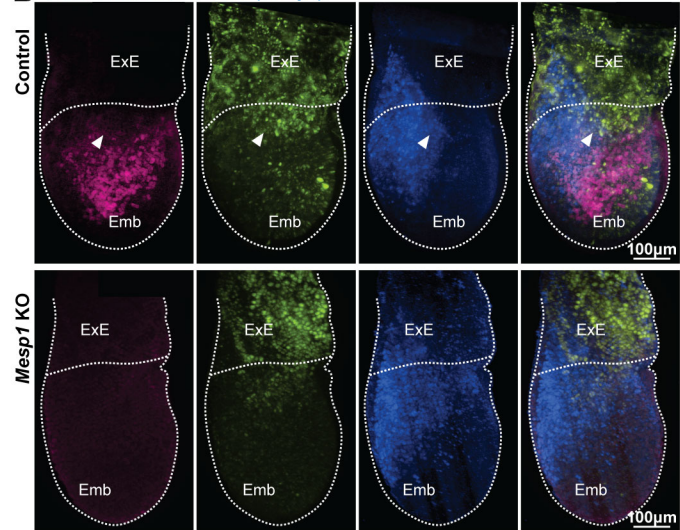

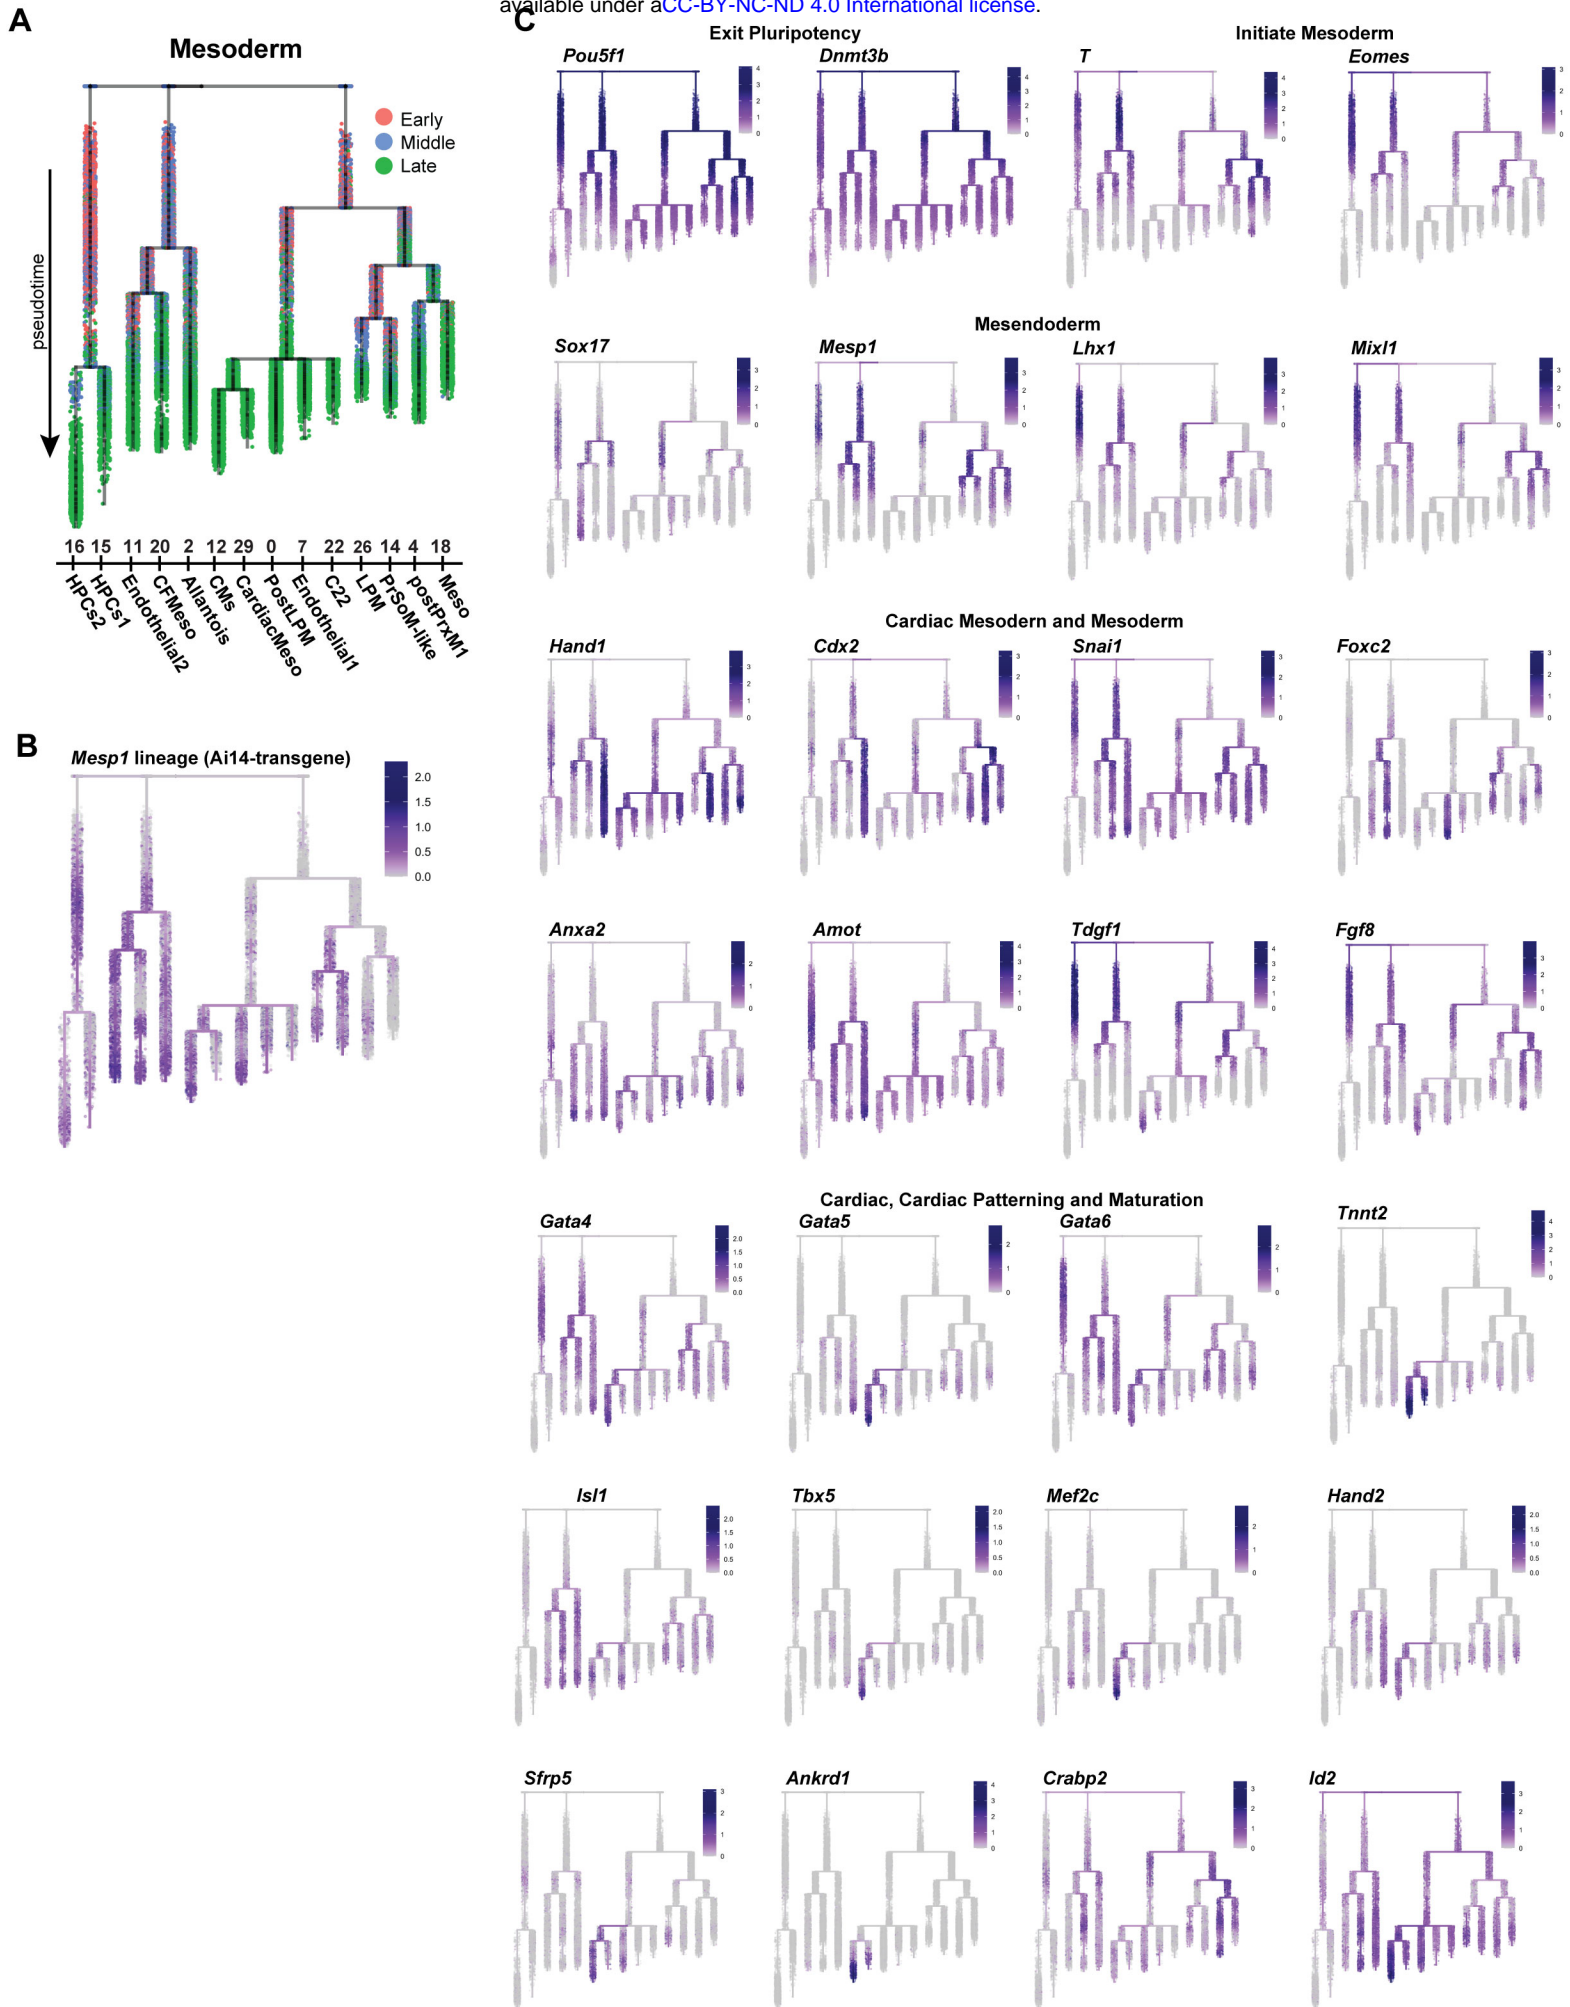



**Fig. S10**

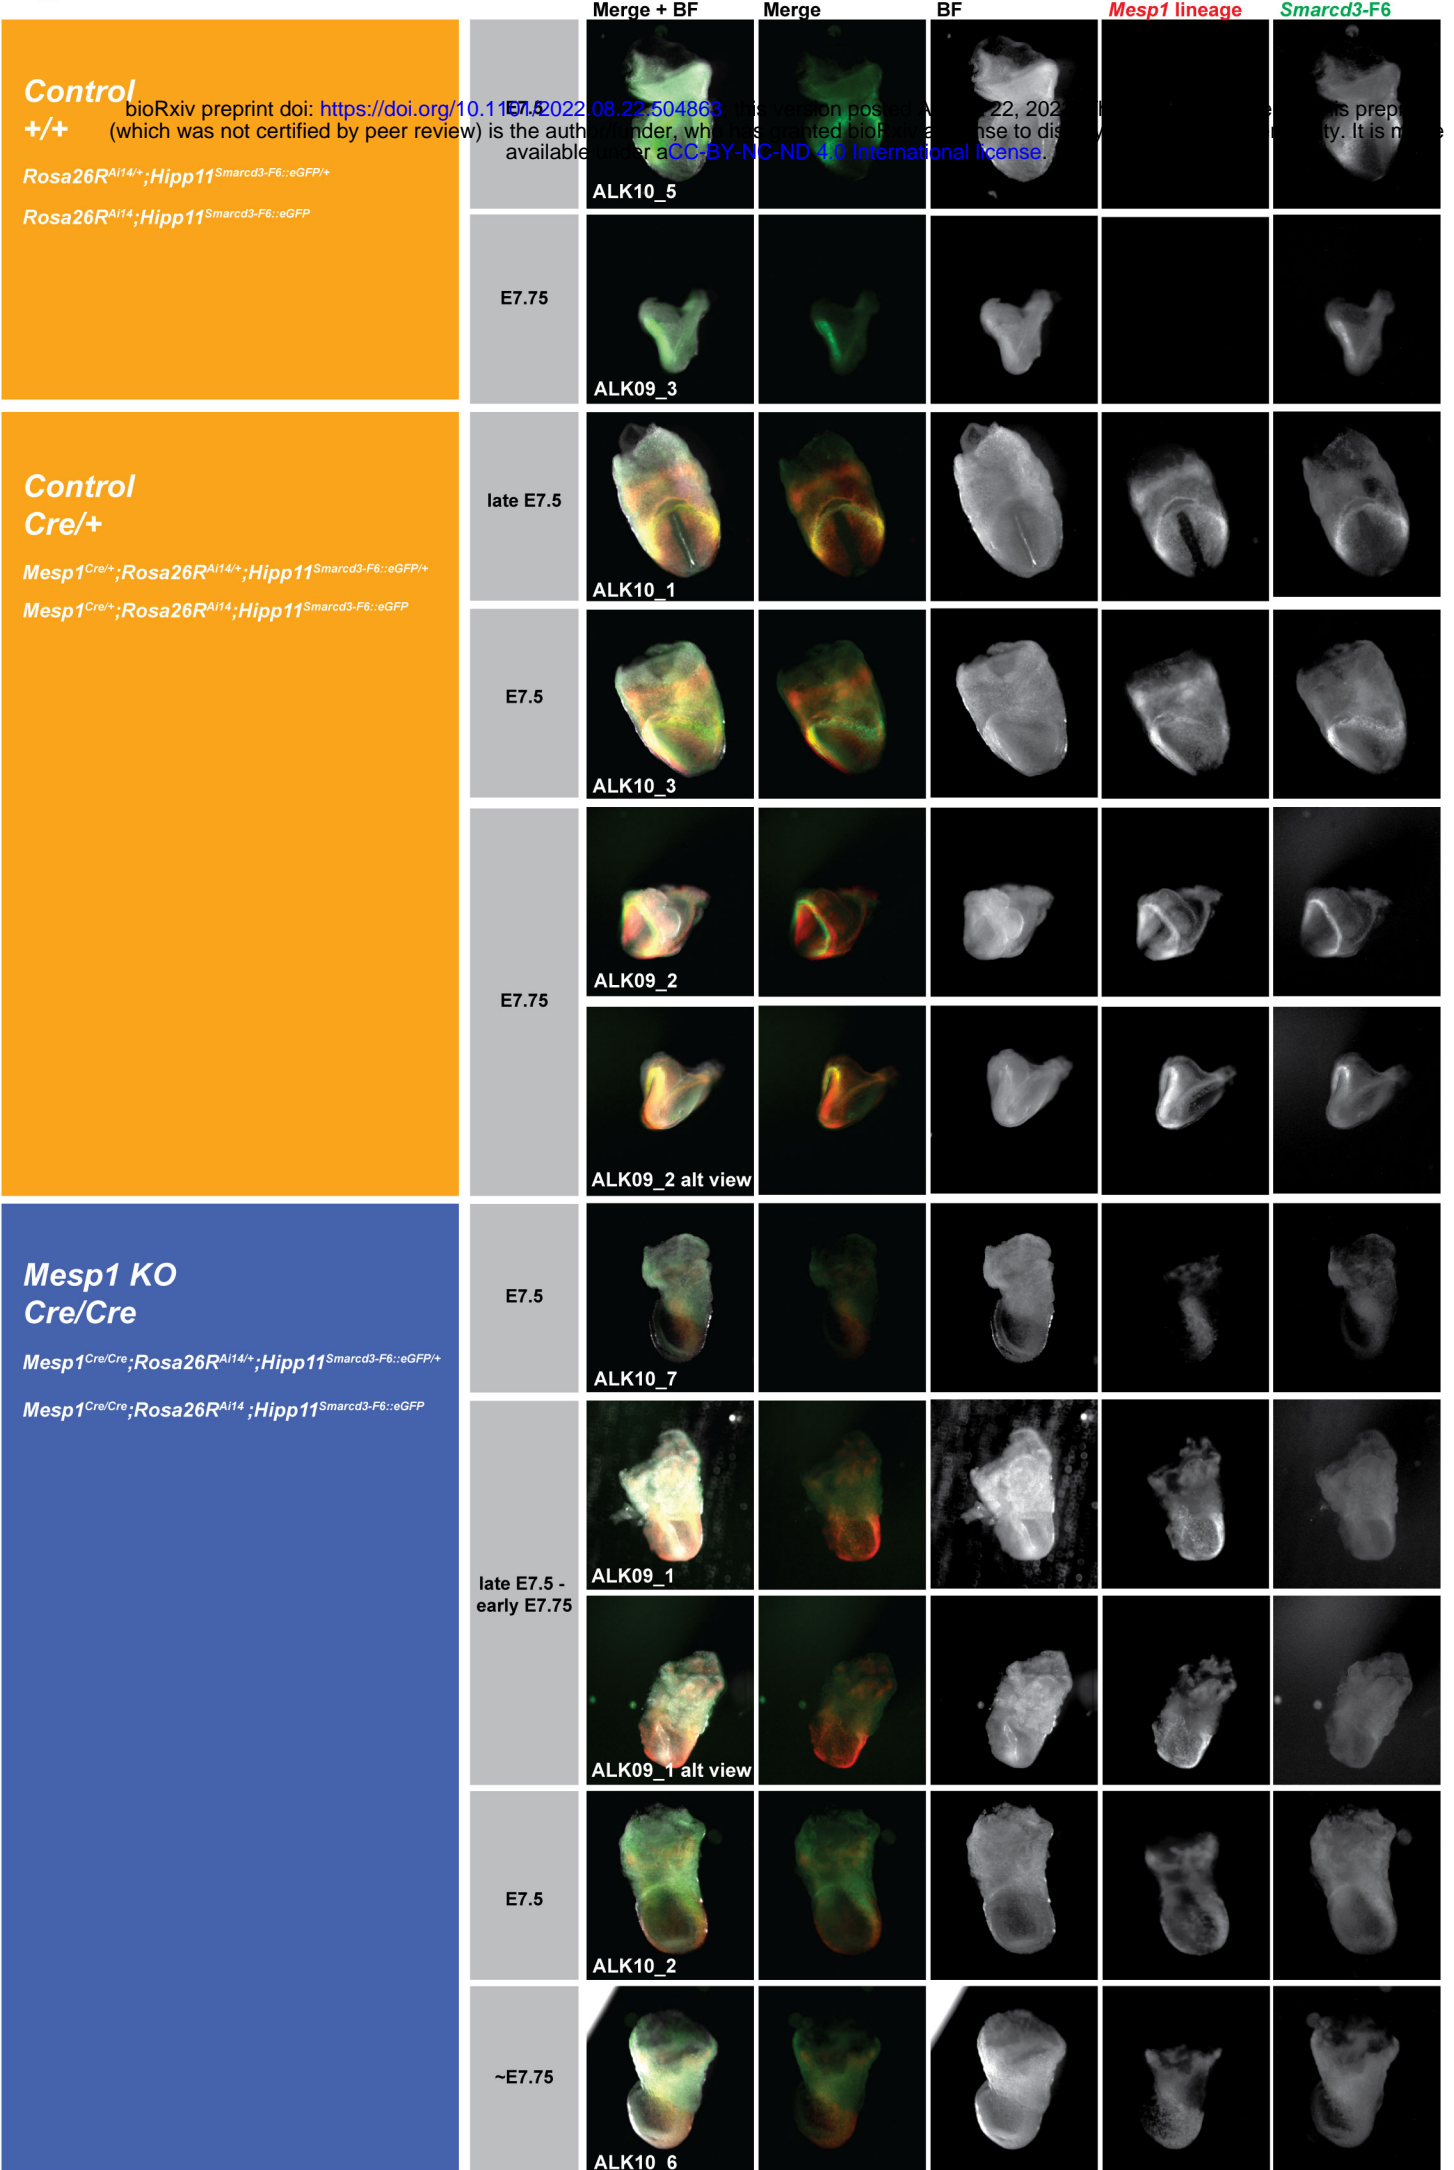



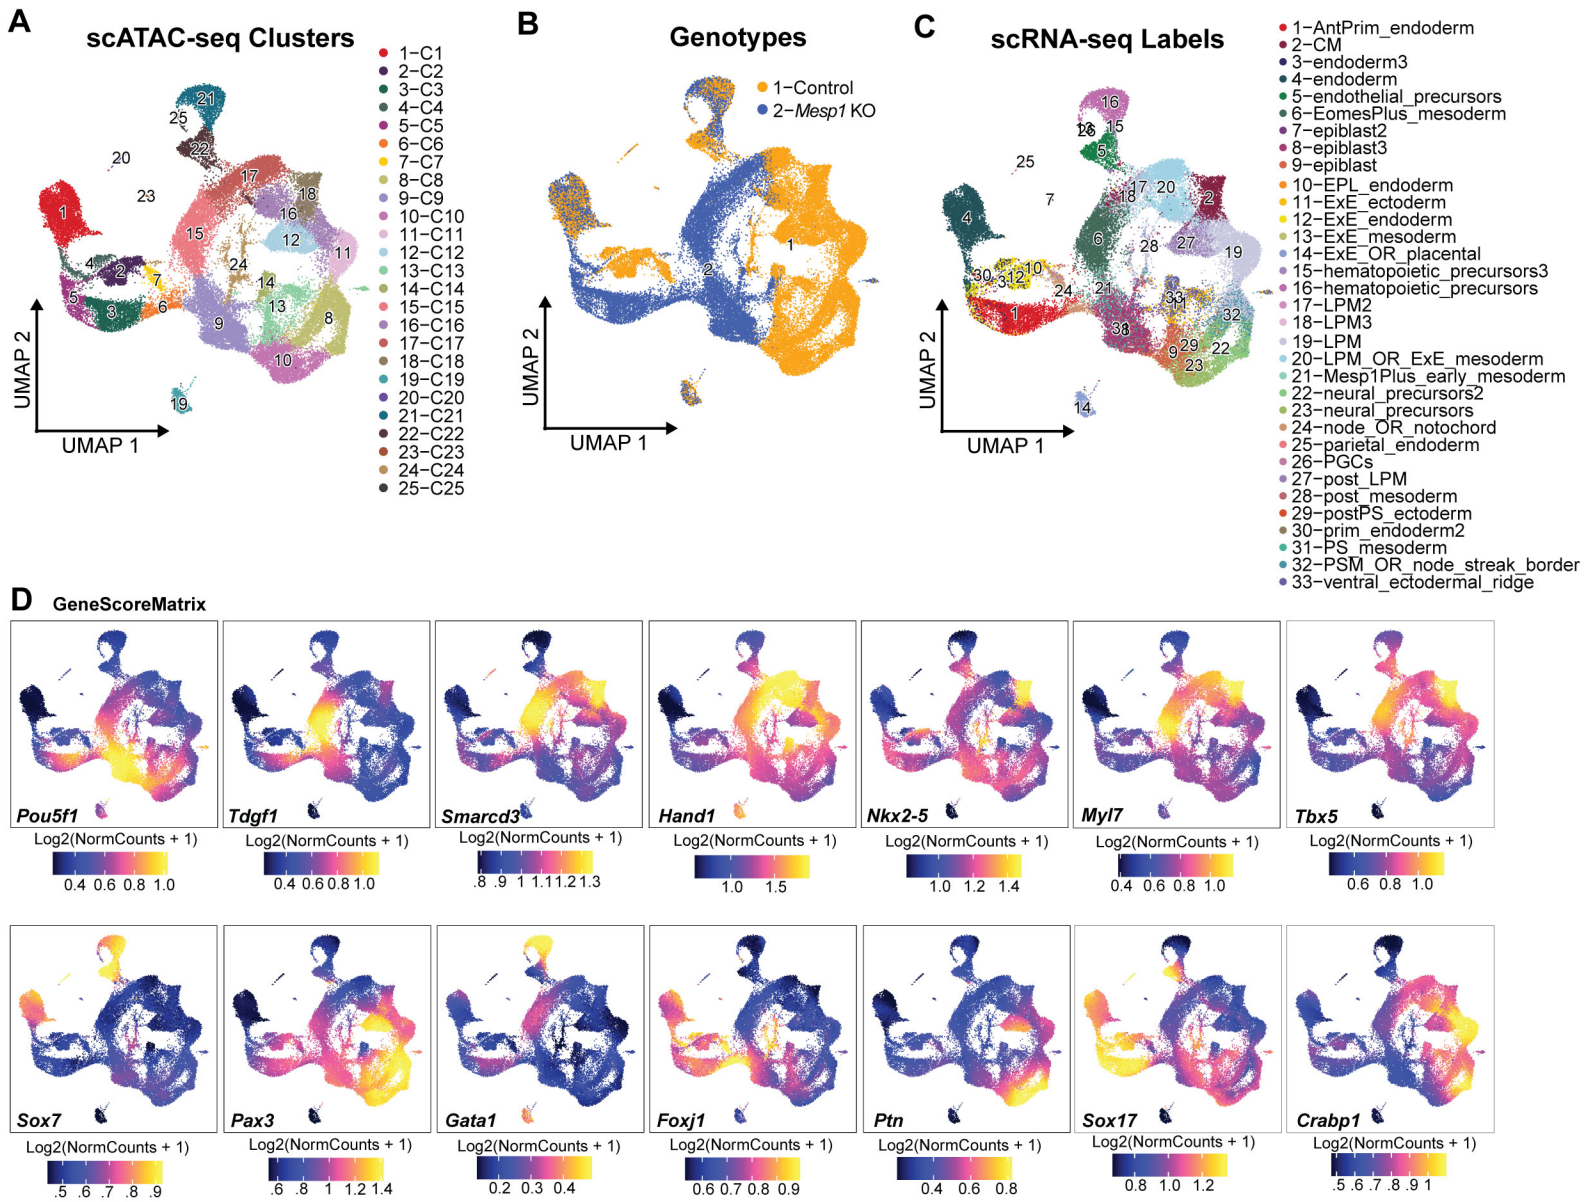

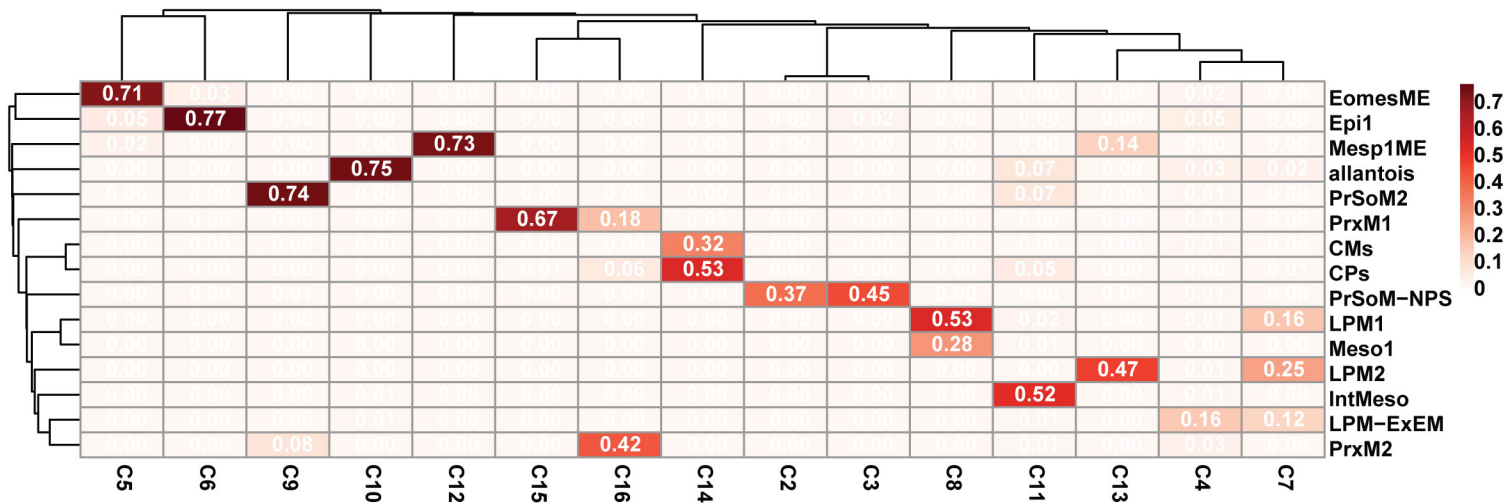

**A**

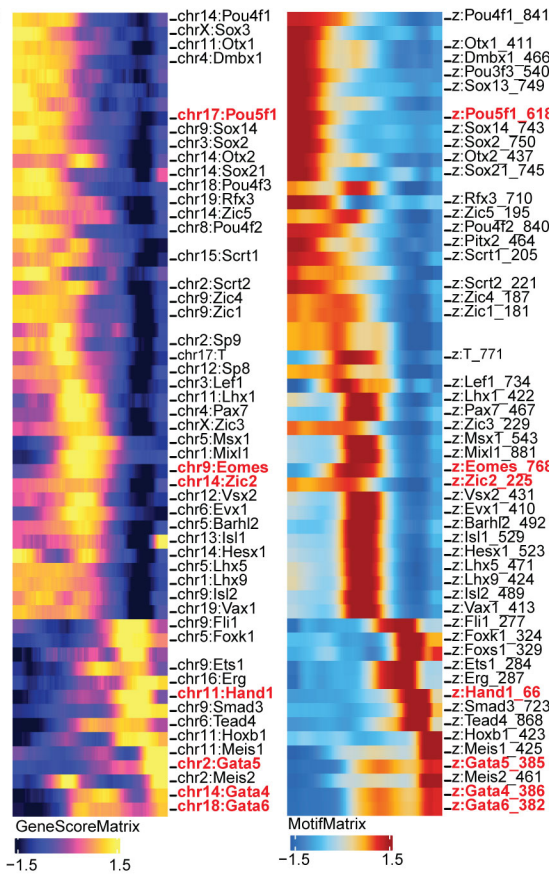

**B**

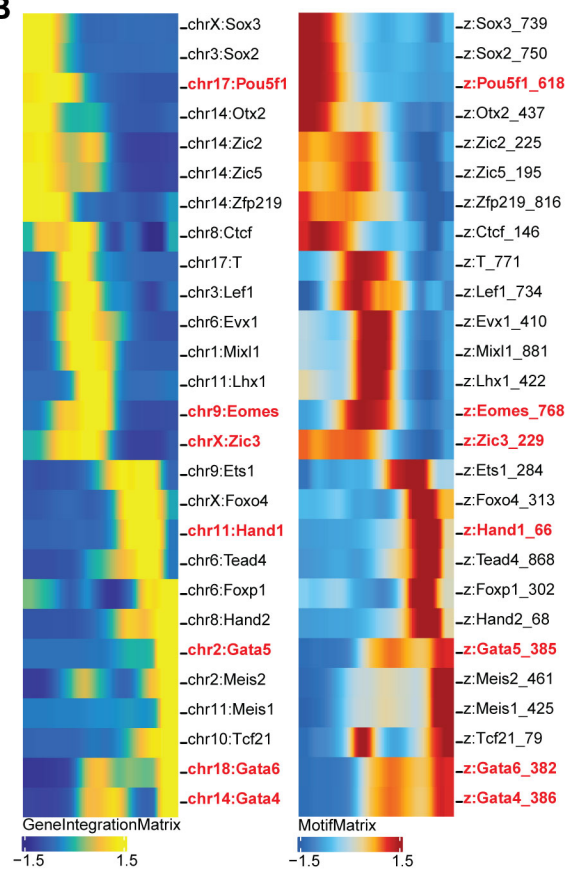



### A Marker Peaks

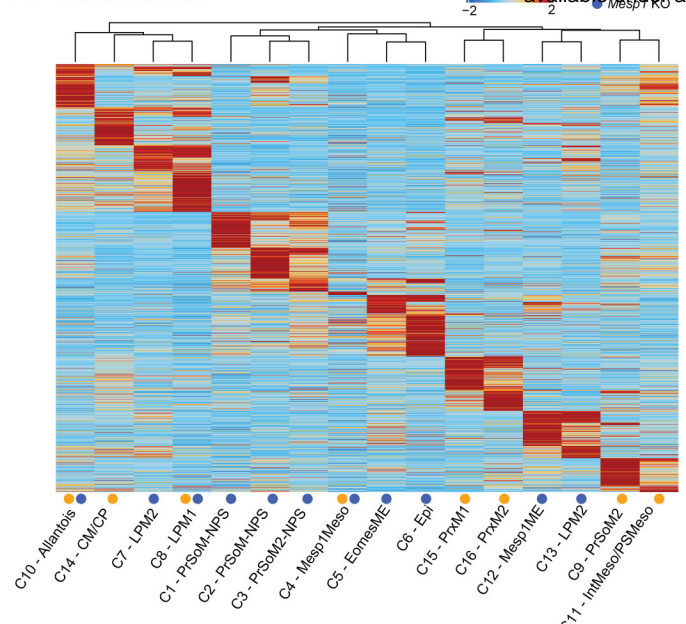

### B Enriched Motifs

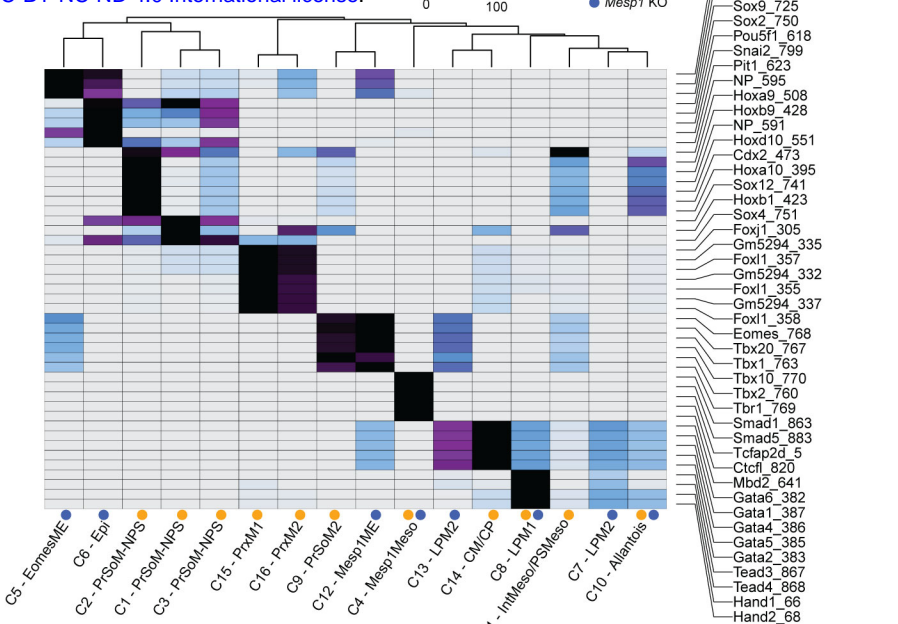

### C Differential Peak Enrichment

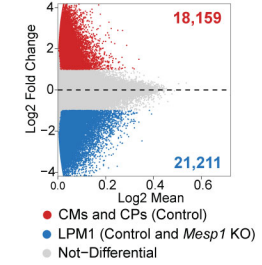

### D Differential Peak Enrichment

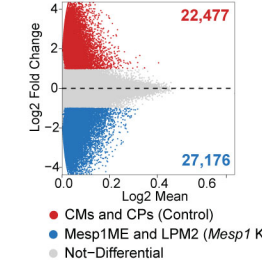

### E Differential Peak Enrichment

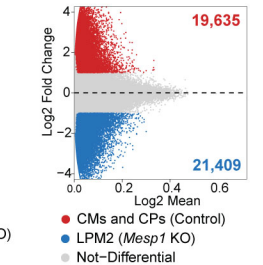

### F Differential Peak Enrichment

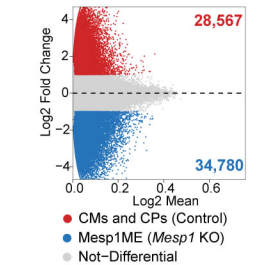

### G Differential Peak Enrichment

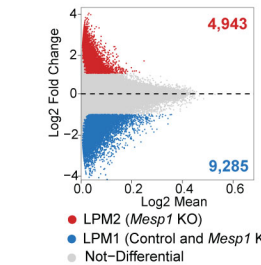

### H Motifs enriched in CM/CP

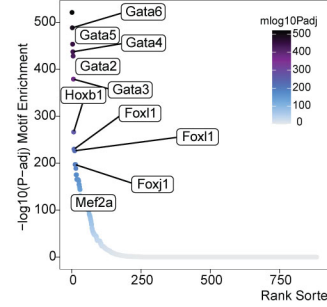

### Motifs enriched in LPM2

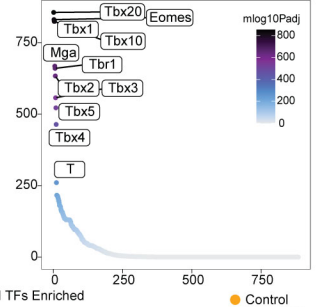

### J Motifs enriched in CM/CP

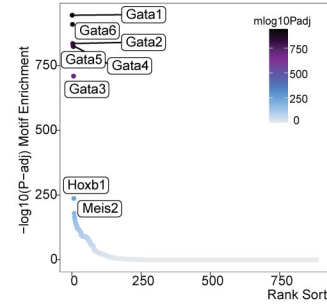

### Motifs enriched in Mesp1ME

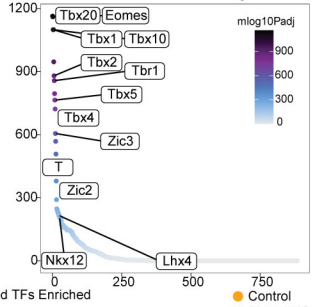

### L Motifs enriched in LPM2

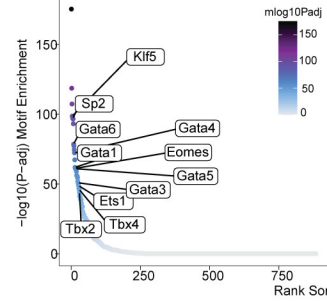

### Motifs enriched in LPM1

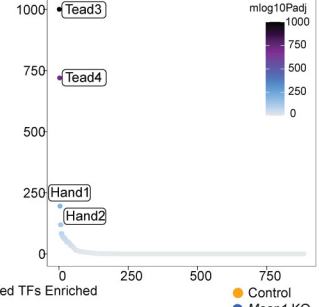

### I CM/CP vs LPM2 (Odds ratio = 6.65)

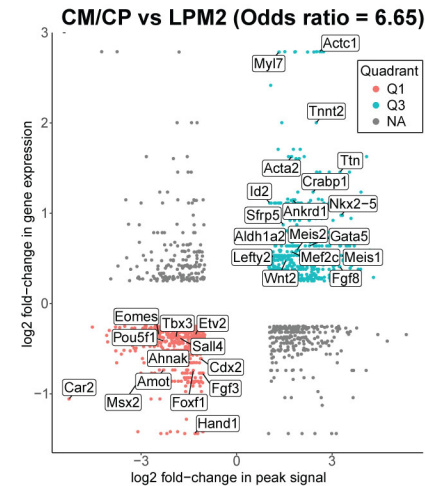

### K CM/CP vs Mesp1ME (Odds ratio = 7.7)

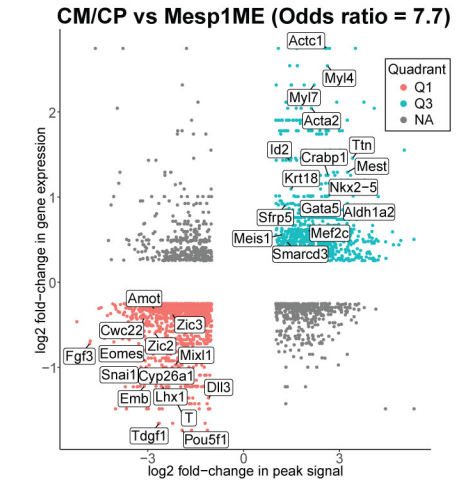

### M LPM2 vs LPM1 (Odds ratio = 8.37)

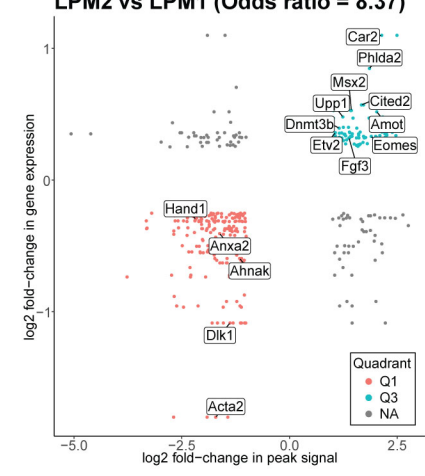

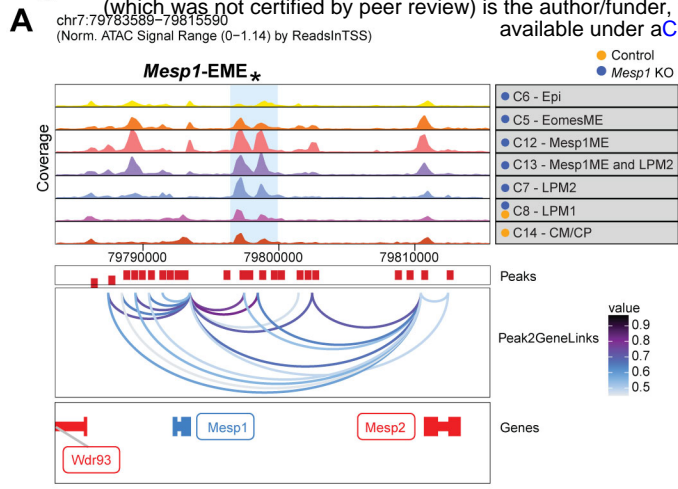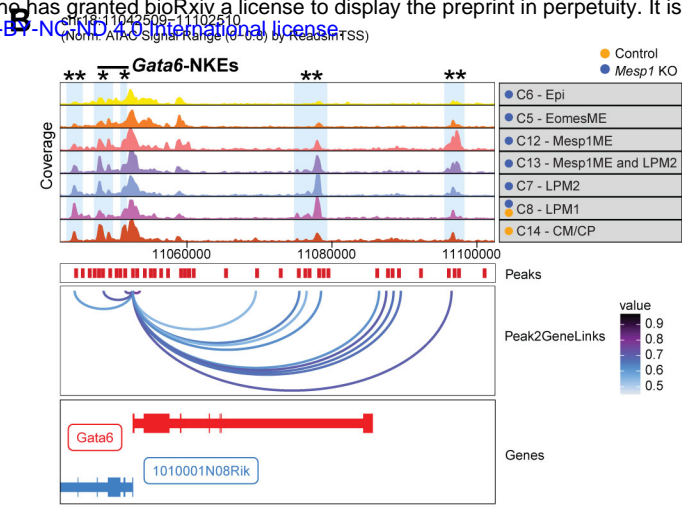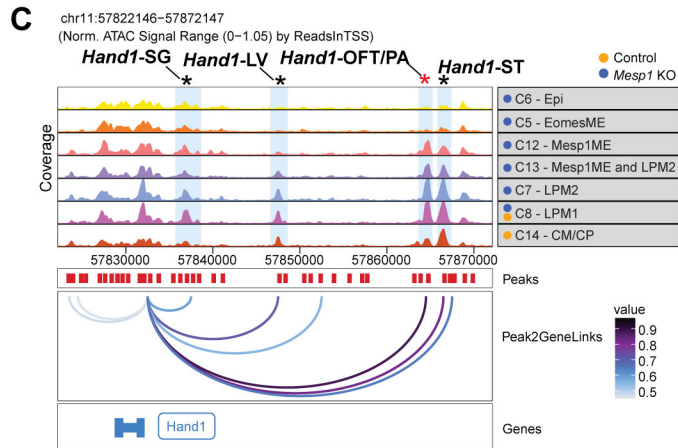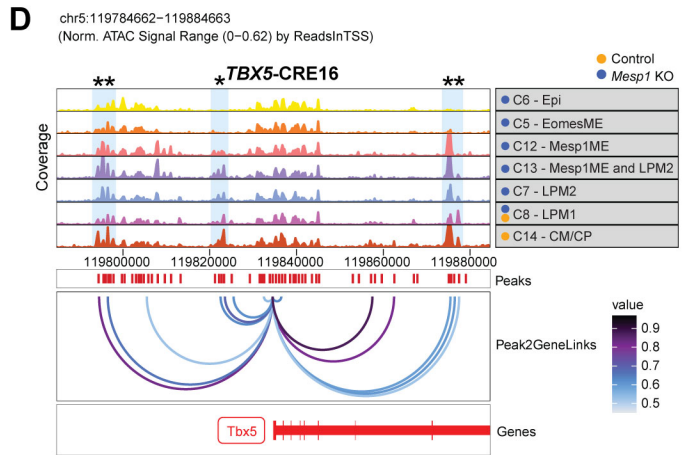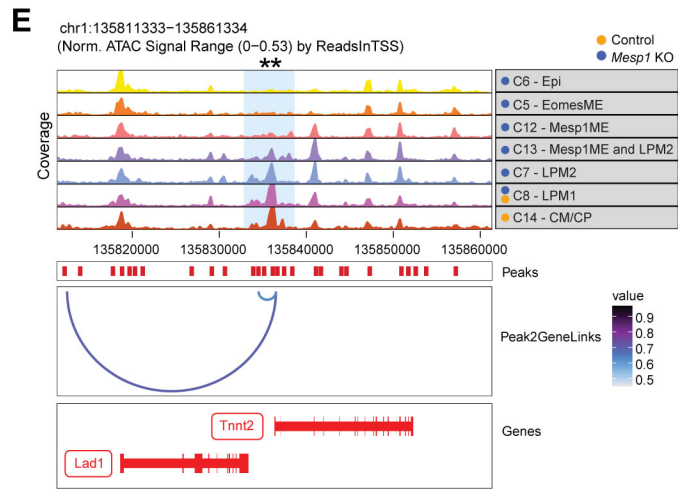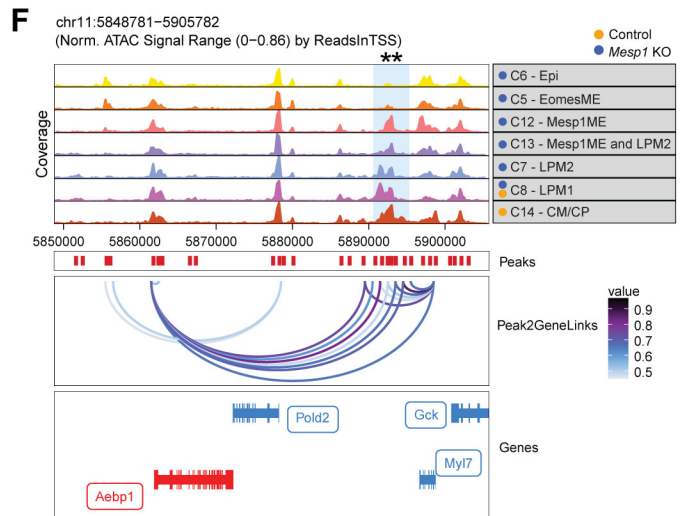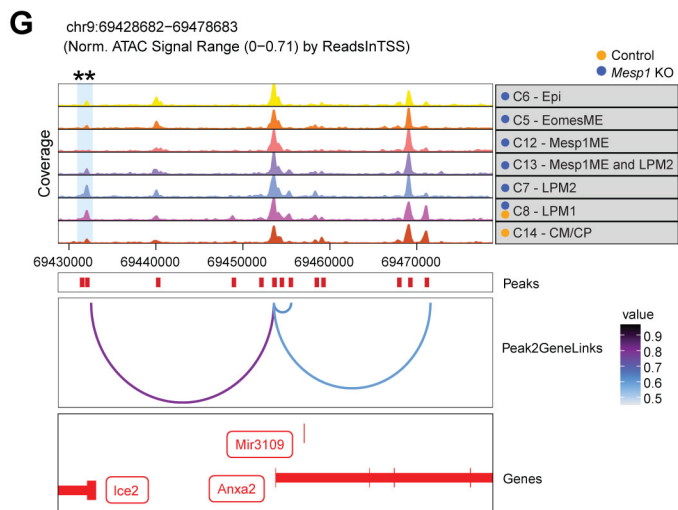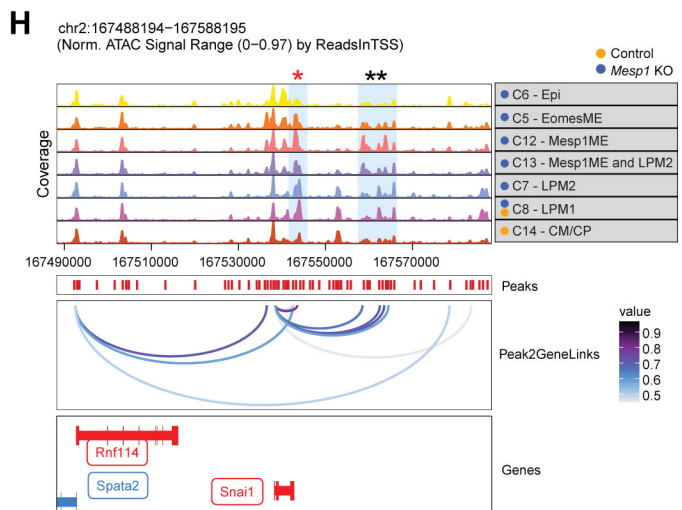

Source: https://www.biorxiv.org/content/10.1101/2022.08.22.504863v1.full.pdf
